# Supplementary material
Source: publisher site journal article supplement (https://www.spandidos-publications.com/2127/downloadSupplementary)
Supplement: Supplementary file 1 [file downloadSupplementary]

## Sheet: DEGs
Data S1. Differentially expressed genes (DEGs) screened (consisting of 844 upregulated and 1,270 downregulated DEGs) between CRC and normal tissues.
Genes	Log fold-change	Average Expression	t	P-value	Adjusted P-value	B
KRT80	6.78772	6.2338	29.0325	4.07559e-38	8.36719e-34	76.0147
MMP7	6.71798	5.48862	15.3663	5.86416e-23	1.38381e-20	41.9526
COL11A1	6.46615	5.55401	13.9526	6.51244e-21	7.95836e-19	37.2809
KRT23	6.30261	5.98658	10.4367	2.37452e-15	5.78279e-14	24.5468
DPEP1	6.24204	7.63436	10.9646	3.15622e-16	9.65682e-15	26.5548
CDH3	5.9798	7.71395	21.502	1.14294e-30	2.93307e-27	59.4385
FOXQ1	5.77044	6.51132	17.1844	1.97153e-25	1.22653e-22	47.5867
KIAA1199	5.6209	8.66255	18.6496	2.64614e-27	2.71627e-24	51.8375
GRIN2D	5.36923	6.77431	23.2827	1.33473e-32	8.2715e-29	63.7774
ETV4	5.33615	8.2557	20.8952	5.5571e-30	1.14087e-26	57.8915
CPNE7	5.25208	5.51088	17.8754	2.5057e-26	2.07013e-23	49.6225
CLDN2	5.16159	7.1434	9.03038	5.86972e-13	8.28746e-12	19.0661
CA9	5.15597	5.56327	10.3193	3.73572e-15	8.73512e-14	24.0959
INHBA	4.882	5.19703	15.2536	8.45932e-23	1.88772e-20	41.5895
MMP3	4.84557	6.42624	8.91431	9.31574e-13	1.27162e-11	18.607
C6orf223	4.73627	6.60481	12.9061	2.50656e-19	1.86448e-17	33.6546
CLDN1	4.68854	8.43983	21.6266	8.29673e-31	2.43331e-27	59.7516
CXCL5	4.42415	5.52784	7.62016	1.67333e-10	1.41372e-09	13.4537
PDX1	4.35146	5.9918	13.1172	1.18691e-19	9.70807e-18	34.3975
MMP1	4.27418	8.07284	9.53068	8.10498e-14	1.38778e-12	21.0348
TRIM29	4.1276	8.40791	13.0577	1.46449e-19	1.16535e-17	34.1887
KLK10	4.02342	6.69365	7.55078	2.21229e-10	1.80683e-09	13.177
C2CD4A	3.99432	6.3018	11.1251	1.71939e-16	5.62984e-15	27.1591
VWA2	3.96634	6.57218	10.996	2.80205e-16	8.67441e-15	26.6732
TACSTD2	3.93758	6.72283	8.04399	3.04077e-11	3.02163e-10	15.1451
PRSS22	3.92796	6.14899	11.3592	7.12907e-17	2.58586e-15	28.0351
ADAM12	3.92171	6.47863	9.91253	1.81339e-14	3.59699e-13	22.5242
GYLTL1B	3.87788	6.84356	11.7859	1.45641e-17	6.58593e-16	29.6151
IL8	3.8267	8.28468	8.44255	6.13774e-12	7.09903e-11	16.7337
MMP11	3.82593	9.16512	11.4254	5.56334e-17	2.09186e-15	28.2818
SIM2	3.81789	5.93474	16.2277	3.75725e-24	1.50209e-21	44.6732
PKP1	3.81134	5.64832	11.0359	2.40948e-16	7.63373e-15	26.8234
COL7A1	3.79155	6.85346	12.2456	2.69833e-18	1.51357e-16	31.292
NKD1	3.76927	7.0258	8.00029	3.62501e-11	3.55403e-10	14.9707
ACAN	3.72442	5.66695	10.561	1.47266e-15	3.77922e-14	25.0222
SULT2B1	3.64522	6.75726	14.3414	1.73854e-21	2.60527e-19	38.5918
MSX2	3.62112	5.39883	10.5464	1.55762e-15	3.96748e-14	24.9663
CHI3L1	3.60909	6.94678	7.28125	6.54083e-10	4.83381e-09	12.1031
NKD2	3.54363	6.02498	10.8447	4.97816e-16	1.4314e-14	26.1013
TRIB3	3.52691	8.68081	21.1259	3.03411e-30	6.92114e-27	58.4838
TESC	3.44466	7.33338	10.5938	1.29868e-15	3.36217e-14	25.1472
FAP	3.41207	6.37468	8.07573	2.67649e-11	2.70548e-10	15.2717
CTHRC1	3.39927	7.3823	11.6109	2.78633e-17	1.1305e-15	28.9697
C17orf96	3.3881	6.28882	17.5146	7.3091e-26	5.00186e-23	48.5663
SLCO4A1	3.37422	8.57818	15.0293	1.7614e-22	3.46744e-20	40.8626
CBX2	3.33093	6.415	14.6137	6.97559e-22	1.14113e-19	39.4978
SPTBN2	3.32647	7.82939	15.9242	9.79143e-24	3.3503e-21	43.7253
LRP8	3.3194	6.79759	14.3328	1.78993e-21	2.65452e-19	38.5629
APLN	3.26694	5.95918	11.7208	1.85305e-17	8.04295e-16	29.3755
CGREF1	3.23623	7.16497	9.79423	2.87969e-14	5.48424e-13	22.0641
FOSL1	3.22272	6.27975	7.74094	1.02917e-10	9.15065e-10	13.9356
MDFI	3.21821	6.18242	13.9777	5.97683e-21	7.43663e-19	37.3661
UCA1	3.19411	5.77273	6.63606	8.6633e-09	5.14634e-08	9.54836
HAGHL	3.18048	5.16747	12.5205	9.97007e-19	6.2595e-17	32.282
SERPINB5	3.17251	7.94776	7.59675	1.83864e-10	1.53474e-09	13.3603
ADAMTS12	3.15189	5.66774	8.49422	4.98995e-12	5.87743e-11	16.9394
TNS4	3.1437	9.03094	7.955	4.34921e-11	4.17044e-10	14.7899
TGFBI	3.01618	12.5245	12.2139	3.02805e-18	1.67532e-16	31.1773
SLC7A5	2.99295	10.3101	15.0842	1.47119e-22	3.08199e-20	41.0411
LMTK3	2.9709	5.66583	13.1052	1.23833e-19	1.00885e-17	34.3554
SLC6A6	2.95141	9.68205	14.483	1.07983e-21	1.69228e-19	39.0643
STC2	2.94803	6.9192	7.54687	2.24739e-10	1.83236e-09	13.1614
MLXIPL	2.94569	7.68439	8.86546	1.13179e-12	1.51866e-11	18.4135
CXCL11	2.93388	5.68651	7.15652	1.07952e-09	7.67668e-09	11.6072
TMPRSS13	2.92185	5.51195	7.4265	3.6474e-10	2.84719e-09	12.6816
KAL1	2.91744	6.13746	9.0642	5.13146e-13	7.36706e-12	19.1997
PRR7	2.91043	5.31493	17.6579	4.76904e-26	3.49673e-23	48.9876
SLC6A20	2.90097	6.27763	5.8624	1.8302e-07	8.49321e-07	6.54314
JUB	2.88158	7.51112	19.2845	4.39415e-28	5.19128e-25	53.6038
PCSK9	2.87328	8.55229	7.96264	4.21764e-11	4.06242e-10	14.8204
C10orf81	2.86348	8.17068	10.8077	5.73281e-16	1.63238e-14	25.9609
LRRC8E	2.83288	6.88684	14.6125	7.00353e-22	1.14113e-19	39.4938
ASCL2	2.82552	8.5544	7.68525	1.28771e-10	1.11925e-09	13.7134
SH3TC2	2.80248	6.44844	9.54185	7.75639e-14	1.3359e-12	21.0785
KIF26B	2.79914	5.11924	7.73751	1.04344e-10	9.24947e-10	13.922
SP5	2.79429	5.93823	8.03723	3.12464e-11	3.09598e-10	15.1181
GLS2	2.76784	5.31565	13.0281	1.62615e-19	1.27423e-17	34.0846
PABPC1L	2.7488	6.8008	10.3412	3.4323e-15	8.06236e-14	24.1802
NFE2L3	2.70695	10.0231	16.2805	3.18445e-24	1.33422e-21	44.8368
MYOM3	2.69778	7.03579	6.65225	8.12204e-09	4.84866e-08	9.61207
CCNO	2.6605	5.50397	8.7201	2.02144e-12	2.57445e-11	17.8371
RHPN1	2.65782	6.88278	11.8357	1.21184e-17	5.6672e-16	29.798
TNFRSF6B	2.65606	7.26142	6.7579	5.32865e-09	3.30007e-08	10.0284
PVT1	2.65428	5.75978	18.7943	1.75138e-27	1.89242e-24	52.2437
FAM40B	2.65307	5.73152	10.9093	3.8945e-16	1.16212e-14	26.3456
SRPX2	2.64854	7.58605	6.34895	2.70932e-08	1.46683e-07	8.42343
KRT7	2.64752	5.07391	7.98093	3.91858e-11	3.80371e-10	14.8934
FER1L4	2.64363	6.2043	7.76393	9.38219e-11	8.41855e-10	14.0274
MACC1	2.62237	9.17091	14.102	3.91131e-21	5.1806e-19	37.787
AZGP1	2.60039	8.65891	8.06714	2.77059e-11	2.78551e-10	15.2374
DUSP4	2.58025	6.76857	6.84098	3.8232e-09	2.42854e-08	10.3565
LOC92659	2.57972	5.28034	17.2608	1.56536e-25	1.00427e-22	47.8145
MEX3A	2.57444	6.84185	11.9889	6.89559e-18	3.43778e-16	30.3588
WISP1	2.57392	5.58471	7.91401	5.129e-11	4.86591e-10	14.6263
PSAT1	2.55933	8.88782	10.2891	4.19731e-15	9.64958e-14	23.98
TNFRSF12A	2.55321	8.75082	11.415	5.78567e-17	2.15662e-15	28.2428
LGR5	2.52672	8.86333	6.81229	4.28795e-09	2.70367e-08	10.2431
VSNL1	2.52269	7.42651	10.3153	3.79432e-15	8.86205e-14	24.0805
CXCL3	2.51994	7.44846	6.35792	2.61487e-08	1.42057e-07	8.45841
C20orf46	2.50852	5.11854	8.32366	9.88753e-12	1.09488e-10	16.2602
MYEOV	2.48518	6.9585	6.76993	5.07873e-09	3.15767e-08	10.0758
UBD	2.48232	9.07386	7.16382	1.04833e-09	7.47041e-09	11.6362
CXCL1	2.4484	8.56167	7.10332	1.33651e-09	9.29487e-09	11.3958
FUT1	2.44582	5.94404	14.0045	5.453e-21	6.9105e-19	37.4572
MPP6	2.44579	5.34759	10.0526	1.05071e-14	2.19441e-13	23.0671
APOC2	2.44361	5.41735	7.47477	3.00373e-10	2.38003e-09	12.8739
KIAA1549	2.42442	8.09685	15.3053	7.14872e-23	1.61278e-20	41.7564
SLC7A11	2.41724	7.48946	9.25829	2.37623e-13	3.67073e-12	19.9651
MSX1	2.41434	5.19087	8.78615	1.55287e-12	2.03061e-11	18.0991
TMPRSS3	2.41045	5.76302	7.94575	4.51411e-11	4.31848e-10	14.753
CELSR3	2.40829	7.09336	9.43466	1.18339e-13	1.94983e-12	20.6584
MTHFD1L	2.40234	8.66209	16.1908	4.21847e-24	1.63406e-21	44.5586
ARNTL2	2.38227	6.47072	12.8736	2.81404e-19	2.05757e-17	33.5395
TEAD4	2.37151	7.96078	15.7711	1.59413e-23	4.99034e-21	43.2428
GDF15	2.34936	9.90457	7.0304	1.79057e-09	1.21804e-08	11.1065
ATHL1	2.34382	8.53881	7.83632	7.01103e-11	6.46324e-10	14.3163
XKRX	2.33568	5.72287	8.20088	1.61867e-11	1.70242e-10	15.7709
COL1A1	2.32211	14.0245	6.42611	1.99585e-08	1.11073e-07	8.72479
RPL36A	2.31932	6.36995	10.0367	1.11774e-14	2.32494e-13	23.0055
GRHL1	2.31189	5.49285	10.3762	2.99904e-15	7.10972e-14	24.3145
GDPD5	2.2781	7.78725	9.20711	2.91035e-13	4.41607e-12	19.7635
BGN	2.27539	10.9408	7.12506	1.22484e-09	8.60574e-09	11.4822
FJX1	2.26975	5.10067	11.9658	7.5052e-18	3.67737e-16	30.2745
S100P	2.26891	10.5651	6.04972	8.80544e-08	4.34662e-07	7.26254
KCNH8	2.26464	5.20811	9.15058	3.64168e-13	5.40982e-12	19.5407
LEF1	2.25961	6.86068	9.90061	1.89976e-14	3.75381e-13	22.4779
TMEM132A	2.25128	8.29443	15.2187	9.47606e-23	2.09187e-20	41.4771
GABRE	2.24485	7.45807	7.81304	7.69951e-11	7.0473e-10	14.2234
PHLDA1	2.2428	10.2878	8.5845	3.47629e-12	4.22547e-11	17.2984
CDC25B	2.21385	10.5711	13.0769	1.36847e-19	1.10609e-17	34.2561
CDKN2A	2.20953	5.39285	6.73705	5.79131e-09	3.56723e-08	9.94612
STC1	2.2008	7.21078	7.99403	3.71735e-11	3.62897e-10	14.9457
SERPINE1	2.19976	8.30776	5.70829	3.32723e-07	1.46395e-06	5.95619
ANLN	2.19059	9.15494	15.0428	1.68513e-22	3.38804e-20	40.9065
GOLGA7B	2.18715	6.11326	8.90411	9.7021e-13	1.32085e-11	18.5666
TNFSF9	2.17652	5.28653	6.86605	3.45843e-09	2.21257e-08	10.4556
SLC11A1	2.17522	5.96961	7.07776	1.48086e-09	1.0202e-08	11.2944
ANKRD13B	2.16968	7.0789	13.4876	3.24042e-20	3.19836e-18	35.6874
GTF2IRD1	2.16717	9.35225	15.5236	3.52706e-23	9.28341e-21	42.4563
MIR17HG	2.15937	5.51869	10.2599	4.70068e-15	1.0699e-13	23.8673
GALNT6	2.15802	9.46743	10.1604	6.91102e-15	1.51423e-13	23.4839
SEC14L2	2.15198	6.32414	10.3019	3.99558e-15	9.26884e-14	24.029
CELSR1	2.14712	8.36813	8.19611	1.64997e-11	1.7309e-10	15.7518
SNTB1	2.14434	9.23351	10.7787	6.40344e-16	1.80581e-14	25.8508
SMOX	2.13996	7.74966	13.4922	3.18989e-20	3.1637e-18	35.703
PPM1H	2.1336	8.76618	12.5826	7.97296e-19	5.11515e-17	32.5042
COL27A1	2.131	6.77354	7.45689	3.22775e-10	2.54086e-09	12.8027
OSBPL3	2.12929	8.93361	19.6609	1.5464e-28	2.24098e-25	54.6299
XRCC2	2.12804	5.81296	13.3019	6.19984e-20	5.47363e-18	35.0428
TTC26	2.12488	5.83172	13.3871	4.60125e-20	4.23604e-18	35.3391
NEBL	2.11202	9.7436	9.20298	2.95839e-13	4.48565e-12	19.7473
TRIP13	2.10592	7.90694	13.3519	5.2032e-20	4.69548e-18	35.2169
SHH	2.0946	5.48692	7.4882	2.84573e-10	2.26533e-09	12.9275
C1orf135	2.09198	5.635	13.8543	9.12082e-21	1.06392e-18	36.9464
SLC17A9	2.08462	8.53349	7.65626	1.44705e-10	1.24106e-09	13.5977
SCD	2.07687	11.9434	7.59342	1.86348e-10	1.55013e-09	13.347
MFAP2	2.07531	7.58017	7.7261	1.09248e-10	9.63014e-10	13.8764
C7orf68	2.07429	8.18544	11.0228	2.53156e-16	7.9227e-15	26.7742
IQGAP3	2.06548	9.24747	10.2572	4.74958e-15	1.07864e-13	23.857
ORC6L	2.06509	7.33134	13.0345	1.58967e-19	1.25042e-17	34.1072
UNC5CL	2.06241	6.89222	9.08163	4.78815e-13	6.95195e-12	19.2686
RNF43	2.05921	11.2087	8.27223	1.21543e-11	1.31677e-10	16.0553
WDR62	2.04921	7.08775	9.43822	1.16691e-13	1.92733e-12	20.6723
RECQL4	2.0421	8.27038	11.5705	3.23748e-17	1.30325e-15	28.8204
UBE2C	2.0378	9.58138	12.0311	5.90692e-18	3.00834e-16	30.5127
MET	2.02665	10.8937	15.0499	1.64639e-22	3.37791e-20	40.9295
ATP11A	2.01585	9.70102	10.8498	4.88296e-16	1.41164e-14	26.1206
MYBL2	2.00195	9.95109	10.1316	7.72927e-15	1.67386e-13	23.3725
C9orf140	2.00021	9.83158	11.4871	4.41776e-17	1.70482e-15	28.5112
UHRF1	1.99453	7.91264	11.7587	1.61073e-17	7.12678e-16	29.5149
TCF7	1.99125	8.95262	9.112	4.24419e-13	6.22826e-12	19.3884
RAD54B	1.98505	6.52026	12.5094	1.03759e-18	6.47467e-17	32.2423
ARID3A	1.98277	7.15651	10.8251	5.36479e-16	1.53826e-14	26.0269
DIO2	1.97727	6.76919	6.80168	4.47366e-09	2.81127e-08	10.2012
SOX9	1.96711	11.3314	11.5736	3.20073e-17	1.29098e-15	28.8318
C11orf82	1.9616	6.80707	12.8553	3.00344e-19	2.1703e-17	33.4748
SKA3	1.95512	7.88158	12.6478	6.30672e-19	4.18248e-17	32.7373
GZMB	1.94472	6.18014	5.50373	7.30731e-07	3.03191e-06	5.18479
PAQR4	1.94382	9.37401	15.1366	1.23924e-22	2.65018e-20	41.2111
BRCA2	1.94372	6.94608	12.139	3.97978e-18	2.13412e-16	30.9055
KIF14	1.93998	6.833	9.85218	2.29557e-14	4.44185e-13	22.2896
E2F7	1.9359	6.3309	11.1356	1.65303e-16	5.42788e-15	27.1983
AXIN2	1.93543	10.4744	6.90524	2.95638e-09	1.91768e-08	10.6106
TPX2	1.93108	10.3691	12.5234	9.86632e-19	6.22543e-17	32.2924
MCM10	1.9263	7.07661	10.0632	1.0081e-14	2.12053e-13	23.1083
CENPI	1.92189	5.79218	9.64941	5.08129e-14	9.15077e-13	21.4992
PMAIP1	1.91781	7.24314	11.3228	8.17029e-17	2.892e-15	27.8994
DBNDD1	1.9104	7.40073	9.02679	5.95415e-13	8.39552e-12	19.0519
TROAP	1.89365	7.87972	10.4846	1.97501e-15	4.89697e-14	24.7301
PLAU	1.88675	9.30849	7.99793	3.65961e-11	3.58112e-10	14.9612
FXYD5	1.88147	9.99651	15.6834	2.11061e-23	6.10456e-21	42.9649
RELL2	1.88047	5.46489	8.64305	2.75049e-12	3.39961e-11	17.5311
ERCC6L	1.8732	6.80058	10.7899	6.13348e-16	1.74405e-14	25.8937
ASPHD1	1.86489	5.75065	8.01242	3.45234e-11	3.39609e-10	15.0191
GRB7	1.86335	9.0576	8.85904	1.16112e-12	1.55295e-11	18.388
HOMER1	1.86179	6.28885	7.68549	1.28649e-10	1.11913e-09	13.7143
MTBP	1.85836	6.27491	11.8119	1.3231e-17	6.09043e-16	29.7106
LOC388796	1.85033	8.56651	10.7564	6.97056e-16	1.92605e-14	25.7664
MYC	1.85006	11.6271	9.43619	1.17629e-13	1.9397e-12	20.6644
KIF18B	1.84482	7.78408	10.4606	2.16646e-15	5.33942e-14	24.6381
ENC1	1.84147	10.6963	15.5525	3.21348e-23	8.56788e-21	42.5485
CEP72	1.83962	6.33711	14.0718	4.33536e-21	5.66911e-19	37.6849
RGS16	1.83572	7.50103	7.45038	3.31343e-10	2.60331e-09	12.7767
DGAT2	1.83332	8.42893	8.98309	7.08442e-13	9.86725e-12	18.8791
PLEKHG4	1.82664	8.3935	9.45723	1.08262e-13	1.80114e-12	20.7469
PUS7	1.82349	8.6893	17.599	5.68243e-26	4.02277e-23	48.8147
DSCC1	1.81265	7.28701	11.8834	1.01645e-17	4.83047e-16	29.9729
SLC22A3	1.81126	7.79347	6.44011	1.88807e-08	1.05446e-07	8.77954
C2	1.80688	10.3217	8.86412	1.13783e-12	1.52478e-11	18.4082
SYT7	1.79937	9.42901	8.10686	2.3617e-11	2.41223e-10	15.3959
TGIF2	1.79547	8.78	10.7308	7.68799e-16	2.09886e-14	25.6689
PTP4A3	1.79049	8.91366	6.95124	2.45913e-09	1.62073e-08	10.7927
PROX1	1.78435	6.65459	5.87409	1.74876e-07	8.14661e-07	6.58786
ECT2	1.77706	10.001	14.3217	1.85806e-21	2.68634e-19	38.5258
PKMYT1	1.77509	8.35712	9.89081	1.97387e-14	3.88902e-13	22.4398
SHROOM4	1.77148	8.08229	7.2464	7.52394e-10	5.49898e-09	11.9645
TTYH3	1.77048	11.1785	12.7659	4.13213e-19	2.85632e-17	33.1577
TNFSF15	1.77047	5.09812	9.7719	3.14273e-14	5.91929e-13	21.9771
FAM72D	1.76587	5.60283	9.69101	4.31562e-14	7.90363e-13	21.6617
ATP6V1C2	1.76505	6.64874	10.5397	1.59839e-15	4.06125e-14	24.9406
DACH1	1.76172	8.15553	6.79784	4.54277e-09	2.85383e-08	10.186
IFITM1	1.75851	11.9389	8.96169	7.71404e-13	1.06934e-11	18.7945
SOX4	1.74891	10.7052	11.734	1.76448e-17	7.70741e-16	29.4242
NSUN5P1	1.74884	6.66706	9.70424	4.09732e-14	7.52397e-13	21.7133
SNAI1	1.74575	6.31405	7.69744	1.22606e-10	1.07019e-09	13.762
TOP1MT	1.74325	9.5165	14.5244	9.40038e-22	1.48454e-19	39.2018
DIAPH3	1.73832	7.52567	10.3121	3.84152e-15	8.96208e-14	24.0682
AGT	1.73688	7.65156	5.93171	1.39701e-07	6.63442e-07	6.8086
SQLE	1.73685	10.0822	8.40952	7.00669e-12	8.01825e-11	16.6022
CYP27B1	1.73643	5.09858	9.71324	3.95519e-14	7.28906e-13	21.7484
BOP1	1.72617	8.44325	8.9738	7.35115e-13	1.02179e-11	18.8424
NUF2	1.72497	7.56014	9.42688	1.22032e-13	2.00426e-12	20.6278
HELLS	1.72424	7.0573	10.1307	7.75389e-15	1.67742e-13	23.3694
TOMM34	1.72171	10.0616	13.0122	1.72038e-19	1.33281e-17	34.0286
ZC3HAV1L	1.71957	5.37129	11.8559	1.12468e-17	5.30798e-16	29.8722
C8orf73	1.71618	7.54145	7.0359	1.75156e-09	1.19387e-08	11.1283
JPH1	1.71308	8.5423	11.2772	9.69563e-17	3.33419e-15	27.7291
TIMP1	1.71263	11.5553	8.43025	6.44792e-12	7.43266e-11	16.6848
PVRL4	1.70686	7.40613	6.15818	5.75147e-08	2.94825e-07	7.68177
GPT2	1.69938	9.71155	10.9265	3.64812e-16	1.09337e-14	26.4107
ZNF469	1.6909	6.38385	5.77531	2.56685e-07	1.15768e-06	6.21089
EXO1	1.69036	7.27961	9.40233	1.34448e-13	2.19065e-12	20.5315
SLC39A10	1.68893	8.58523	17.0896	2.62792e-25	1.5868e-22	47.3029
IER5L	1.68406	7.37352	7.56745	2.06873e-10	1.70635e-09	13.2435
RHBDF2	1.68232	9.0977	11.3519	7.32722e-17	2.62069e-15	28.0078
CHPF	1.68049	10.7872	12.499	1.07729e-18	6.68179e-17	32.205
FBXO41	1.67842	7.54327	7.25183	7.36154e-10	5.39952e-09	11.9861
SLC5A6	1.67084	10.145	10.1226	8.00426e-15	1.72613e-13	23.3378
ITGA2	1.66972	10.1103	10.5384	1.6062e-15	4.07605e-14	24.9358
KIF4A	1.66842	8.83017	9.42168	1.24559e-13	2.0376e-12	20.6074
PTK7	1.66722	9.7036	7.00639	1.97155e-09	1.32664e-08	11.0113
ANXA9	1.6653	5.80139	7.30249	6.0055e-10	4.47687e-09	12.1877
ATAD2	1.66434	9.35043	11.9986	6.65408e-18	3.34005e-16	30.3943
NUP62CL	1.66218	5.78	8.29015	1.13109e-11	1.23446e-10	16.1267
JAG2	1.66113	8.54935	7.31454	5.72161e-10	4.2933e-09	12.2356
C7orf40	1.65878	8.28954	10.9623	3.18434e-16	9.69947e-15	26.5459
CDC6	1.65664	8.72168	9.32861	1.79908e-13	2.84553e-12	20.2418
HAPLN3	1.65036	7.2672	7.68534	1.28723e-10	1.11925e-09	13.7138
TRPM2	1.64993	8.06662	6.16562	5.58539e-08	2.87029e-07	7.71062
PYCR1	1.647	10.6406	10.908	3.91323e-16	1.16433e-14	26.3408
RFC3	1.64684	8.72103	13.468	3.46933e-20	3.34481e-18	35.6196
AP1S3	1.6445	7.71215	9.07445	4.92668e-13	7.12287e-12	19.2402
KIAA1274	1.64271	8.7068	6.27434	3.63863e-08	1.93126e-07	8.13276
CEP55	1.63841	8.79931	9.94077	1.62419e-14	3.24996e-13	22.6338
KIF20A	1.63836	8.10582	8.82148	1.34871e-12	1.78064e-11	18.2392
E2F1	1.63639	8.34424	12.2132	3.03565e-18	1.67532e-16	31.1748
HECW2	1.63613	5.65781	7.28596	6.41808e-10	4.75508e-09	12.1219
PODNL1	1.63479	5.85866	7.24493	7.56843e-10	5.5256e-09	11.9587
GINS1	1.63462	8.56856	8.72762	1.96162e-12	2.50449e-11	17.8669
C15orf42	1.63404	7.14718	8.70301	2.16435e-12	2.73609e-11	17.7692
S100A11	1.63263	12.0753	11.8324	1.22662e-17	5.72332e-16	29.7859
HJURP	1.63139	8.07025	10.9005	4.02701e-16	1.19596e-14	26.3123
SP6	1.63041	7.61847	5.83138	2.06482e-07	9.49189e-07	6.42463
ACBD7	1.62952	5.04637	6.67916	7.29602e-09	4.39973e-08	9.71798
EME1	1.62903	5.63963	11.1745	1.42746e-16	4.75743e-15	27.3443
ASB9	1.62818	6.16484	5.87717	1.72796e-07	8.05885e-07	6.59962
ZP3	1.62753	7.7911	9.24556	2.49913e-13	3.84036e-12	19.915
MFI2	1.6274	8.30312	6.60467	9.81737e-09	5.77013e-08	9.42489
PDPN	1.62696	8.11754	5.97813	1.16533e-07	5.62261e-07	6.98689
OTUB2	1.62501	6.56971	9.74214	3.53151e-14	6.59708e-13	21.8611
EFNA3	1.62341	8.52729	7.6142	1.71399e-10	1.44378e-09	13.4299
LZTS1	1.62112	6.00916	6.57166	1.11956e-08	6.52046e-08	9.29521
C5orf34	1.61853	5.36178	10.9351	3.5302e-16	1.06365e-14	26.4433
FGFRL1	1.61761	9.306	9.20171	2.97329e-13	4.50492e-12	19.7423
CBX8	1.60923	7.16158	14.7748	4.08013e-22	7.09874e-20	40.0297
RAD54L	1.60873	7.49741	9.32725	1.80878e-13	2.85867e-12	20.2365
LIF	1.60286	8.48016	7.43416	3.53673e-10	2.76501e-09	12.7121
PPAT	1.60154	8.39625	14.3556	1.6573e-21	2.50179e-19	38.6392
SLC2A1	1.6001	11.3503	7.6671	1.38528e-10	1.19294e-09	13.641
ZSWIM4	1.59746	7.68638	11.9186	8.92863e-18	4.30293e-16	30.1018
CHTF18	1.59671	8.18957	9.93477	1.6626e-14	3.32359e-13	22.6105
MEGF6	1.59607	7.95046	7.02503	1.82957e-09	1.24087e-08	11.0852
CDH11	1.5956	9.24358	7.55396	2.18412e-10	1.78788e-09	13.1897
C16orf59	1.59495	6.38342	9.50006	9.144e-14	1.54261e-12	20.9148
ACCN2	1.59471	7.33925	5.85698	1.86922e-07	8.66256e-07	6.52241
LOXL2	1.59367	9.46604	7.07882	1.47455e-09	1.01688e-08	11.2986
NSUN5P2	1.58779	8.11374	9.68243	4.46341e-14	8.12356e-13	21.6282
BMP4	1.58717	9.54608	7.08834	1.41932e-09	9.82424e-09	11.3364
RAB36	1.58467	6.77518	6.1502	5.93485e-08	3.03392e-07	7.65086
ProSAPiP1	1.58401	8.38466	7.46642	3.10641e-10	2.4557e-09	12.8406
FCHO1	1.57826	7.35097	6.01872	9.94251e-08	4.86e-07	7.14305
DKC1	1.57637	10.9906	16.5885	1.2206e-24	5.96643e-22	45.7852
SPHK1	1.5761	6.7597	6.09169	7.46872e-08	3.74622e-07	7.42457
OVGP1	1.57102	6.01357	9.24605	2.49427e-13	3.83576e-12	19.9169
VEGFA	1.56649	10.8289	9.57021	6.93719e-14	1.20491e-12	21.1895
UTP14A	1.56427	9.32117	14.0311	4.98101e-21	6.42453e-19	37.547
C10orf2	1.56398	8.62403	16.3168	2.84224e-24	1.21565e-21	44.9493
LRRC6	1.56384	5.6245	5.95818	1.25984e-07	6.03043e-07	6.91021
TMEM206	1.56277	7.11294	13.8574	9.02295e-21	1.06392e-18	36.9572
TFAP4	1.56216	8.46192	19.4692	2.62737e-28	3.37124e-25	54.1092
FOXA2	1.55948	9.11615	6.15916	5.72919e-08	2.93854e-07	7.68559
CCND1	1.55871	11.4117	13.1874	9.26695e-20	7.73376e-18	34.6434
CDC45	1.55625	7.75904	7.68334	1.29762e-10	1.12596e-09	13.7058
RRP12	1.555	9.55248	11.6778	2.1735e-17	9.20173e-16	29.2168
FAM89A	1.55436	6.92783	10.2197	5.49189e-15	1.23628e-13	23.7126
COL5A2	1.55049	10.8673	5.47307	8.21592e-07	3.37751e-06	5.07
POLR3G	1.54452	6.12113	8.88323	1.05437e-12	1.42035e-11	18.4839
FKBP10	1.54449	10.0392	6.66268	7.79133e-09	4.6697e-08	9.65312
C19orf28	1.5442	9.60453	15.1065	1.36737e-22	2.89404e-20	41.1136
C20orf199	1.54403	10.4552	7.65628	1.44694e-10	1.24106e-09	13.5978
C20orf20	1.53606	8.92666	14.5547	8.49299e-22	1.3622e-19	39.3025
SPNS2	1.53429	9.51959	8.072	2.71692e-11	2.73963e-10	15.2568
IRAK2	1.53165	7.16586	6.77335	5.00976e-09	3.11857e-08	10.0893
REEP6	1.52932	7.82107	6.75431	5.40569e-09	3.34072e-08	10.0142
UBE2S	1.52697	8.60041	9.50921	8.82023e-14	1.499e-12	20.9507
CDCA5	1.52557	9.08609	10.5092	1.79667e-15	4.47642e-14	24.8243
E2F5	1.52522	7.66165	10.1444	7.3539e-15	1.60442e-13	23.4221
DDX12	1.52501	6.42524	9.19418	3.06335e-13	4.62431e-12	19.7126
LY6E	1.52465	10.5628	5.8252	2.11503e-07	9.70096e-07	6.40103
STX1A	1.52295	6.73042	8.62417	2.96614e-12	3.63987e-11	17.4561
CKAP2L	1.52282	7.19173	10.8644	4.61901e-16	1.34699e-14	26.1759
ZNF280C	1.5209	6.45737	12.3391	1.92126e-18	1.10796e-16	31.6297
CDCA7	1.52009	10.6993	8.40707	7.07597e-12	8.09301e-11	16.5925
KIF18A	1.51863	6.8849	9.72031	3.84708e-14	7.12179e-13	21.776
PGF	1.51702	6.95246	5.45612	8.76529e-07	3.57614e-06	5.00662
TYRO3	1.50528	7.15702	6.90597	2.94781e-09	1.91333e-08	10.6135
CBX4	1.501	8.82193	13.9532	6.49813e-21	7.95836e-19	37.2831
PMEPA1	1.49997	10.7383	6.12647	6.5151e-08	3.30423e-07	7.55903
FANCA	1.49532	8.49849	8.52359	4.43619e-12	5.27633e-11	17.0562
HSPH1	1.49397	11.2008	7.727	1.08855e-10	9.59959e-10	13.88
LOC541471	1.49144	6.58568	7.94616	4.50669e-11	4.31339e-10	14.7547
CCNF	1.49039	8.55689	10.2024	5.87151e-15	1.31024e-13	23.6461
CENPA	1.48923	7.06141	8.61208	3.11308e-12	3.8088e-11	17.4081
CDK1	1.48798	9.60186	9.07639	4.88879e-13	7.07806e-12	19.2479
CCDC113	1.48542	7.07486	7.74213	1.02422e-10	9.11853e-10	13.9404
NKRF	1.4849	8.29642	15.3846	5.52662e-23	1.31932e-20	42.0114
NCRNA00152	1.48466	6.46706	7.00909	1.95029e-09	1.31449e-08	11.022
NOP2	1.48298	9.72411	14.3279	1.81955e-21	2.66824e-19	38.5466
POP1	1.48265	7.58563	11.5313	3.74688e-17	1.4793e-15	28.675
CENPF	1.48085	9.6064	7.41974	3.74801e-10	2.91796e-09	12.6546
CKS2	1.48061	9.45145	7.73516	1.05335e-10	9.32528e-10	13.9126
FAM54A	1.47894	6.6598	8.90061	9.83815e-13	1.33583e-11	18.5527
TOP2A	1.47692	10.9996	10.0154	1.21441e-14	2.5028e-13	22.923
HSF4	1.47688	6.05437	7.24604	7.53503e-10	5.50513e-09	11.963
GRAMD2	1.47627	6.06328	5.54059	6.34518e-07	2.66231e-06	5.32312
DUSP14	1.47364	7.38933	8.78472	1.56178e-12	2.04095e-11	18.0934
CKAP2	1.46999	9.48902	13.5063	3.03672e-20	3.05607e-18	35.7519
MST1	1.4671	5.36363	6.38727	2.32791e-08	1.27581e-07	8.57302
NEK2	1.46634	8.40935	9.16855	3.39112e-13	5.06693e-12	19.6115
ALDH4A1	1.4647	8.80465	8.30469	1.06694e-11	1.16947e-10	16.1847
GTSE1	1.46461	7.96363	8.64974	2.67783e-12	3.32181e-11	17.5577
RUNX1	1.46375	9.92496	10.3612	3.17683e-15	7.51387e-14	24.2572
KIF21B	1.46287	8.77326	6.85715	3.58374e-09	2.28633e-08	10.4204
SORD	1.462	9.71043	7.56385	2.09891e-10	1.72915e-09	13.2291
POLQ	1.46135	7.0507	7.43533	3.52015e-10	2.75415e-09	12.7168
MELK	1.46085	8.47514	8.45837	5.76064e-12	6.69683e-11	16.7967
FOXM1	1.4601	9.86207	8.29329	1.11689e-11	1.22032e-10	16.1392
ZDHHC9	1.45943	10.9676	11.771	1.53908e-17	6.869e-16	29.5602
ASPM	1.45919	8.37239	8.29595	1.10506e-11	1.20803e-10	16.1498
AURKA	1.45914	9.20353	9.40073	1.353e-13	2.20022e-12	20.5252
C17orf53	1.45435	6.23596	9.23514	2.60443e-13	3.98725e-12	19.874
SHCBP1	1.45382	7.37392	8.61684	3.05441e-12	3.7437e-11	17.427
ANGPT2	1.45085	6.68544	7.98229	3.89715e-11	3.78469e-10	14.8988
C19orf48	1.44797	10.0753	11.2101	1.2482e-16	4.23562e-15	27.4778
NOD2	1.44702	6.20021	5.68287	3.67051e-07	1.60399e-06	5.85984
BUB1	1.44673	8.80057	8.16206	1.89189e-11	1.96065e-10	15.616
EVPL	1.44673	10.0784	6.78422	4.79692e-09	2.99634e-08	10.1322
KIF2C	1.44533	8.74373	9.73337	3.655e-14	6.79685e-13	21.8269
PLK1	1.43953	9.55957	9.22434	2.71827e-13	4.14299e-12	19.8314
SNHG1	1.43869	9.03061	10.5103	1.78922e-15	4.46871e-14	24.8284
SNHG3	1.43677	6.11588	8.78674	1.54924e-12	2.02714e-11	18.1015
GNB1L	1.43525	6.98249	9.74709	3.46364e-14	6.48209e-13	21.8804
ADAMTS14	1.43328	6.72883	5.84605	1.95037e-07	9.01825e-07	6.48066
CAD	1.43187	10.2571	10.7512	7.10995e-16	1.96193e-14	25.7467
KIF23	1.42851	8.36444	9.28168	2.16614e-13	3.37412e-12	20.0572
CDCA3	1.42801	7.89136	9.43698	1.17262e-13	1.93521e-12	20.6675
CHAC1	1.42657	6.64229	6.70057	6.69886e-09	4.07369e-08	9.80232
FERMT1	1.42531	11.659	7.1833	9.69452e-10	6.94204e-09	11.7136
LOC652276	1.42506	5.81249	9.04022	5.64452e-13	8.00323e-12	19.105
RPS6KL1	1.42485	6.74756	9.16134	3.48941e-13	5.19866e-12	19.5831
PRR11	1.42412	6.70085	8.57852	3.56058e-12	4.31515e-11	17.2746
HKDC1	1.42127	9.68028	5.51471	7.00661e-07	2.91895e-06	5.22596
RNF32	1.42061	5.71514	8.7695	1.65959e-12	2.1537e-11	18.0331
CSE1L	1.4201	11.13	14.0316	4.97154e-21	6.42453e-19	37.5489
C20orf151	1.41806	7.46442	6.77198	5.03732e-09	3.13383e-08	10.0839
PLEKHA9	1.41732	5.58895	13.7346	1.37697e-20	1.53637e-18	36.5374
DNA2	1.41625	7.11716	9.33808	1.73298e-13	2.75799e-12	20.279
CACNA1D	1.41456	7.38899	6.92999	2.67748e-09	1.75283e-08	10.7086
AHCY	1.41386	12.5122	10.4675	2.10927e-15	5.20854e-14	24.6647
KAT2A	1.41183	10.102	16.5557	1.3511e-24	6.45071e-22	45.6848
ESPL1	1.41091	8.20918	7.54324	2.28039e-10	1.85632e-09	13.1469
DTL	1.41044	8.22105	8.90226	9.7738e-13	1.32797e-11	18.5593
PLXNA1	1.40918	10.145	11.5392	3.63823e-17	1.44753e-15	28.7043
NME1	1.40799	10.5197	9.07396	4.93637e-13	7.12683e-12	19.2382
BYSL	1.40797	8.67087	15.8935	1.07963e-23	3.57496e-21	43.6286
NOTCH3	1.40617	9.85594	5.5563	5.97432e-07	2.51492e-06	5.38214
C3orf26	1.40526	8.37367	13.4807	3.31999e-20	3.24569e-18	35.6633
CLSPN	1.40365	6.42472	6.21462	4.60519e-08	2.40205e-07	7.90067
CYP2S1	1.40124	10.9479	6.46514	1.70955e-08	9.62356e-08	8.87752
TMEM97	1.40056	9.79292	9.93014	1.69292e-14	3.38091e-13	22.5925
MSH5	1.39993	7.66756	8.54884	4.00959e-12	4.79423e-11	17.1567
TAF1A	1.39976	6.25956	11.5206	3.89888e-17	1.52756e-15	28.6355
FAM72B	1.39945	6.47615	7.97028	4.08998e-11	3.94955e-10	14.8509
EDNRA	1.39885	7.14466	6.10057	7.21279e-08	3.62849e-07	7.45888
CENPE	1.39767	7.70264	7.73988	1.03356e-10	9.1817e-10	13.9314
XPOT	1.39752	10.449	16.1188	5.29159e-24	1.97521e-21	44.3344
ZNRF3	1.39659	9.20727	9.77044	3.16085e-14	5.94795e-13	21.9714
FANCI	1.39518	9.47124	9.45789	1.07979e-13	1.7979e-12	20.7495
QSOX2	1.394	8.84622	13.2624	7.12085e-20	6.19454e-18	34.9052
GPR157	1.39355	5.26432	7.72076	1.11624e-10	9.8179e-10	13.8551
PERP	1.39256	12.7331	9.62075	5.68688e-14	1.01084e-12	21.3872
ATAD5	1.38976	6.65556	9.24346	2.51999e-13	3.86662e-12	19.9067
NCAPG2	1.38628	9.13637	11.6549	2.36606e-17	9.85298e-16	29.1324
DBF4	1.3862	8.38995	11.4128	5.83233e-17	2.16916e-15	28.2348
F12	1.38393	7.70981	6.96157	2.3594e-09	1.56052e-08	10.8336
SLC12A2	1.37681	12.5674	8.26788	1.23682e-11	1.33853e-10	16.038
WDR90	1.3747	8.95473	10.069	9.85727e-15	2.07985e-13	23.1306
SCML1	1.37434	8.37524	8.88341	1.05364e-12	1.42031e-11	18.4846
C11orf84	1.37391	8.38921	11.1945	1.32353e-16	4.44714e-15	27.4195
TH1L	1.37277	10.7764	12.6971	5.28551e-19	3.58124e-17	32.9129
RRM2	1.37063	10.3718	7.42253	3.70623e-10	2.88982e-09	12.6657
KLHL17	1.36855	6.21622	9.45371	1.09773e-13	1.82119e-12	20.7331
RIPK2	1.36069	8.41802	13.6131	2.09614e-20	2.24135e-18	36.1201
RPGRIP1L	1.35978	6.64368	10.0362	1.1199e-14	2.32707e-13	23.0036
PHF16	1.35748	8.22395	10.8754	4.42918e-16	1.30087e-14	26.2176
RBM28	1.35626	8.51141	14.8703	2.97438e-22	5.3565e-20	40.3431
GRAMD1A	1.35537	9.84043	11.8408	1.18896e-17	5.57292e-16	29.8169
MORC4	1.35528	8.91239	8.18342	1.73628e-11	1.81588e-10	15.7012
CCDC86	1.35493	9.32541	14.7162	4.95725e-22	8.41094e-20	39.8366
PDCD2L	1.3536	7.47576	12.9394	2.22694e-19	1.67469e-17	33.7721
CCDC64	1.35358	7.61729	8.02676	3.25897e-11	3.22286e-10	15.0763
MAD2L1	1.3525	9.1564	7.79778	8.18737e-11	7.45311e-10	14.1624
PYCRL	1.35231	8.48352	9.38816	1.42185e-13	2.30029e-12	20.4758
MKI67	1.35228	11.237	6.25871	3.87021e-08	2.04308e-07	8.07196
GTF3A	1.35225	11.0036	9.12441	4.0402e-13	5.963e-12	19.4374
IMPDH1	1.35084	10.1051	9.59515	6.28906e-14	1.10638e-12	21.2871
LOC151162	1.35062	11.1759	6.98919	2.11225e-09	1.41097e-08	10.9431
ACTR3B	1.34899	7.3614	11.8241	1.26499e-17	5.87563e-16	29.7553
NEIL3	1.34887	5.67398	7.3875	4.26693e-10	3.28311e-09	12.5262
ZNF697	1.34633	6.91994	8.75814	1.7366e-12	2.24652e-11	17.988
CBFB	1.34554	9.80138	15.7329	1.80126e-23	5.43823e-21	43.1218
SGOL1	1.34182	6.47705	7.99474	3.70674e-11	3.62034e-10	14.9485
EZH2	1.33951	8.77281	9.71116	3.98756e-14	7.34212e-13	21.7403
KIAA1524	1.33897	7.43388	9.62453	5.60306e-14	9.97666e-13	21.402
HES6	1.33889	9.35787	6.84898	3.7028e-09	2.35789e-08	10.3881
THSD1P1	1.33541	7.22662	7.21764	8.44546e-10	6.10082e-09	11.8501
PITX1	1.33474	8.76467	6.067	8.22867e-08	4.09936e-07	7.3292
DNAJC2	1.3347	9.37669	16.2237	3.8046e-24	1.50209e-21	44.6608
NOP56	1.33314	11.0314	11.8147	1.3092e-17	6.05359e-16	29.7211
ZNF692	1.33286	7.98991	11.4803	4.53294e-17	1.73946e-15	28.4856
FASN	1.33253	11.8119	6.89181	3.11974e-09	2.01347e-08	10.5575
NUDCD1	1.33169	8.92845	12.1204	4.25957e-18	2.2714e-16	30.8379
HMMR	1.33153	8.5851	6.73587	5.81871e-09	3.58181e-08	9.94146
CPNE1	1.33049	11.2489	8.89846	9.9228e-13	1.34643e-11	18.5442
B3GNTL1	1.32982	6.07198	10.6194	1.17694e-15	3.07804e-14	25.2452
CD3EAP	1.32672	8.54409	13.6809	1.6578e-20	1.82982e-18	36.3531
PSPH	1.32519	8.31682	10.8541	4.80359e-16	1.3929e-14	26.1369
BRIP1	1.32487	6.49015	7.9245	4.91705e-11	4.67781e-10	14.6682
SHMT2	1.32464	10.9661	11.5359	3.68331e-17	1.45981e-15	28.6921
ASNS	1.32445	9.57512	9.18026	3.23717e-13	4.85812e-12	19.6577
MTHFD2	1.32307	10.1217	8.12844	2.16548e-11	2.22398e-10	15.482
DDIT4	1.32217	10.6451	7.68159	1.30681e-10	1.13298e-09	13.6988
RAE1	1.32203	9.65101	11.1189	1.76034e-16	5.73647e-15	27.1357
HMGA1	1.32148	12.2079	10.6175	1.18565e-15	3.09688e-14	25.2378
MND1	1.31773	6.12255	7.01208	1.92705e-09	1.30054e-08	11.0338
SLC12A8	1.31714	8.26403	7.68383	1.29507e-10	1.12422e-09	13.7077
METTL1	1.31627	8.13505	12.612	7.17255e-19	4.65989e-17	32.6094
HSPD1	1.3136	13.219	11.976	7.22863e-18	3.55885e-16	30.3119
PSMC3IP	1.31142	5.93343	7.21595	8.50313e-10	6.13816e-09	11.8434
KIAA0895	1.31102	6.52787	7.46097	3.17521e-10	2.50527e-09	12.8189
PUS1	1.30775	8.93301	12.3943	1.57292e-18	9.22628e-17	31.8286
LOC642846	1.30695	6.90603	8.98904	6.91865e-13	9.66258e-12	18.9027
DDX21	1.30387	11.1135	12.8354	3.22414e-19	2.29037e-17	33.4043
UBE2T	1.30329	8.27408	8.67581	2.41283e-12	3.02046e-11	17.6612
TTK	1.30247	8.06101	8.846	1.22309e-12	1.6284e-11	18.3364
IL20RA	1.30225	8.45615	6.20044	4.86991e-08	2.52967e-07	7.84562
C2orf15	1.29989	6.03532	8.74638	1.82004e-12	2.34266e-11	17.9414
RAB15	1.29845	10.3963	8.15465	1.94903e-11	2.01479e-10	15.5865
NFKBIL2	1.29556	8.57741	7.57624	1.99686e-10	1.65371e-09	13.2785
DNMT3B	1.29552	5.70444	6.67062	7.54865e-09	4.5431e-08	9.68437
RAD51AP1	1.29324	7.87963	7.48248	2.912e-10	2.31539e-09	12.9047
BUB1B	1.29321	8.55174	7.44116	3.43856e-10	2.69339e-09	12.74
TRAF5	1.2922	9.43129	8.84275	1.239e-12	1.64745e-11	18.3235
PRIC285	1.29171	10.254	7.28151	6.53381e-10	4.83036e-09	12.1042
ADAT2	1.28815	7.64987	9.6972	4.21201e-14	7.72077e-13	21.6858
GPR56	1.28718	11.5594	8.33501	9.44713e-12	1.04894e-10	16.3055
PAFAH1B3	1.28575	9.16563	11.3092	8.59885e-17	3.01253e-15	27.8486
URB2	1.28561	8.4519	11.7717	1.53499e-17	6.86563e-16	29.5628
PHKA1	1.28405	7.96076	5.83523	2.03418e-07	9.36359e-07	6.43932
ZBTB12	1.28335	6.79994	8.79612	1.4923e-12	1.96264e-11	18.1387
EXOSC5	1.28247	8.92324	11.1069	1.84229e-16	5.94688e-15	27.0904
LOC349114	1.281	7.09768	6.37377	2.45579e-08	1.34196e-07	8.52029
GINS4	1.27513	7.32319	7.64511	1.51346e-10	1.29087e-09	13.5533
NUP210	1.27509	10.2314	6.69197	6.93266e-09	4.2059e-08	9.76844
CCNE1	1.27447	7.03925	8.71285	2.08087e-12	2.64195e-11	17.8083
CENPP	1.27402	5.84895	8.13195	2.13519e-11	2.19617e-10	15.4959
CCNB1	1.27296	9.93492	7.17904	9.86192e-10	7.057e-09	11.6967
TNFRSF10B	1.26834	10.2311	9.11742	4.15383e-13	6.12191e-12	19.4098
CDT1	1.26719	8.99504	7.89948	5.43778e-11	5.13276e-10	14.5683
WDR4	1.26648	7.80827	8.4611	5.69797e-12	6.64166e-11	16.8076
MFSD2B	1.26596	5.78907	9.42263	1.24096e-13	2.03327e-12	20.6111
CD44	1.26485	12.1644	11.659	2.32999e-17	9.72251e-16	29.1476
TMEM63A	1.26485	11.3069	9.51937	8.47426e-14	1.44379e-12	20.9905
STIL	1.26006	8.32166	8.53241	4.28229e-12	5.10246e-11	17.0913
BICD1	1.25961	5.96727	6.68116	7.23809e-09	4.37053e-08	9.72586
FAM92A1	1.25822	6.73236	5.75967	2.72731e-07	1.22277e-06	6.15135
LYAR	1.25752	8.66428	13.0206	1.67012e-19	1.30371e-17	34.0581
TIGD1	1.25555	6.28857	10.3943	2.79695e-15	6.68969e-14	24.3839
KPNA2	1.25499	10.8377	9.47288	1.01781e-13	1.70299e-12	20.8083
RNF24	1.25486	7.20094	8.8859	1.04322e-12	1.40718e-11	18.4945
TBC1D16	1.25374	8.32855	9.09748	4.4961e-13	6.57443e-12	19.3311
PILRB	1.25214	9.28734	7.41412	3.83369e-10	2.9764e-09	12.6322
RUVBL1	1.2517	9.86671	14.0005	5.52936e-21	6.96428e-19	37.4434
PAICS	1.25155	11.4668	11.6229	2.66502e-17	1.09207e-15	29.014
ZMYND19	1.25148	8.3472	13.8555	9.08406e-21	1.06392e-18	36.9505
IFITM3	1.25113	12.5513	6.85468	3.61938e-09	2.30764e-08	10.4106
DDX11	1.25092	8.88129	8.9116	9.41701e-13	1.28374e-11	18.5962
NMB	1.25039	6.02746	8.5825	3.50425e-12	4.25191e-11	17.2905
NCAPH	1.25024	8.37005	7.80186	8.054e-11	7.3521e-10	14.1787
C12orf48	1.24997	7.7902	7.03622	1.74926e-09	1.19271e-08	11.1296
TMEM67	1.24852	6.64618	9.17603	3.29194e-13	4.9295e-12	19.641
SLC7A1	1.24797	11.0879	9.13701	3.84307e-13	5.68841e-12	19.4871
MCM7	1.24618	11.694	13.339	5.44464e-20	4.88116e-18	35.1719
SAMD10	1.24612	7.37906	8.05294	2.93329e-11	2.93044e-10	15.1808
TRAP1	1.24538	11.3025	16.1566	4.69719e-24	1.7858e-21	44.4523
CMTM7	1.24491	7.87545	8.12971	2.15446e-11	2.21488e-10	15.487
ETV5	1.2437	7.74136	6.48213	1.59805e-08	9.03303e-08	8.94406
FAM60A	1.24333	10.8085	10.1864	6.24896e-15	1.38096e-13	23.5841
NXT1	1.24293	8.56343	7.60192	1.8008e-10	1.50654e-09	13.3809
DLEU2	1.24195	5.23286	7.96474	4.18214e-11	4.03095e-10	14.8288
WDR43	1.23964	10.0669	14.6566	6.04478e-22	1.00894e-19	39.6399
WNT5A	1.23799	8.18628	5.87114	1.76896e-07	8.23695e-07	6.57658
TTLL4	1.23792	8.88983	12.5518	8.90643e-19	5.64349e-17	32.3942
PTRH1	1.23647	7.19878	9.77323	3.1264e-14	5.90111e-13	21.9823
ARHGEF19	1.23486	7.77516	7.78935	8.46975e-11	7.67361e-10	14.1288
BLM	1.23363	7.32635	6.0629	8.36212e-08	4.15777e-07	7.31337
EPHB4	1.23304	11.1553	12.4332	1.3661e-18	8.1767e-17	31.9688
RRS1	1.23169	9.24385	10.7454	7.26985e-16	1.99799e-14	25.7246
?|155060	1.23162	6.7747	7.27582	6.68508e-10	4.93686e-09	12.0815
AEN	1.23106	9.20323	8.40373	7.17134e-12	8.19297e-11	16.5792
NLE1	1.23033	8.69092	13.5401	2.70027e-20	2.78575e-18	35.8685
INPP5D	1.23028	9.65429	6.41792	2.06171e-08	1.14335e-07	8.69277
RCN1	1.22963	11.2614	11.0012	2.74745e-16	8.53331e-15	26.6928
BIRC5	1.22865	8.38141	6.60309	9.87926e-09	5.80318e-08	9.41869
MCM2	1.22761	10.2528	10.3941	2.79905e-15	6.68969e-14	24.3832
C12orf11	1.22713	8.99851	12.0626	5.26177e-18	2.74871e-16	30.6278
GPR4	1.22595	6.40409	6.50377	1.46643e-08	8.34042e-08	9.02886
EPR1	1.22467	8.79751	6.09925	7.25034e-08	3.64559e-07	7.45377
KIF24	1.22418	6.93718	9.39071	1.40759e-13	2.279e-12	20.4858
F2R	1.22267	9.37852	7.2816	6.53151e-10	4.83036e-09	12.1046
RRP9	1.22123	9.09099	12.6094	7.23911e-19	4.68829e-17	32.6002
PLXNA3	1.22078	9.46885	8.45438	5.85351e-12	6.78941e-11	16.7808
PRKDC	1.2196	11.8084	7.15116	1.10299e-09	7.83002e-09	11.5859
DDX31	1.21863	8.05377	14.8758	2.92095e-22	5.35226e-20	40.3611
NOLC1	1.21683	11.3585	14.4527	1.19545e-21	1.84531e-19	38.9634
SPC25	1.21473	7.20662	7.67852	1.32308e-10	1.1466e-09	13.6865
PLOD3	1.21473	11.3492	10.4043	2.69072e-15	6.48361e-14	24.4224
MSL3L2	1.21433	6.86217	9.26003	2.35992e-13	3.64828e-12	19.972
PCNXL2	1.21296	7.33724	7.7683	9.21853e-11	8.28256e-10	14.0448
DHX34	1.21113	8.86985	12.3004	2.21064e-18	1.25026e-16	31.4902
CIT	1.20755	8.77015	6.69858	6.75228e-09	4.1001e-08	9.79447
NUFIP1	1.20628	7.69975	10.3057	3.93768e-15	9.14485e-14	24.0436
ABCC1	1.20537	10.286	8.49024	5.07013e-12	5.96845e-11	16.9235
MC1R	1.20279	5.84112	7.3435	5.09271e-10	3.86029e-09	12.351
GRINA	1.2009	11.418	9.06686	5.07748e-13	7.31001e-12	19.2102
SPIN4	1.1994	8.23981	10.4599	2.17237e-15	5.34756e-14	24.6353
C6orf167	1.19689	7.60238	11.8474	1.16074e-17	5.46559e-16	29.8408
RNASEH2A	1.1964	8.96366	11.5493	3.50413e-17	1.40234e-15	28.7417
XPO5	1.19557	9.95891	12.1352	4.03542e-18	2.15748e-16	30.8917
MMP14	1.19554	11.9575	6.39835	2.22794e-08	1.22594e-07	8.6163
C13orf37	1.19535	8.99811	8.96044	7.7525e-13	1.07395e-11	18.7895
DHCR7	1.19363	10.3268	8.09714	2.45576e-11	2.50083e-10	15.3571
RELT	1.19346	7.24381	7.89712	5.48958e-11	5.1769e-10	14.5589
DCAF13	1.19102	9.87102	11.8929	9.81435e-18	4.70715e-16	30.0077
PPP1R13L	1.19068	8.75868	7.7877	8.52608e-11	7.71783e-10	14.1222
TARBP1	1.19067	9.22049	10.3902	2.84075e-15	6.78147e-14	24.3684
FIGNL1	1.1886	8.14118	12.1701	3.55215e-18	1.92925e-16	31.0185
KNTC1	1.18803	8.52836	10.0151	1.21544e-14	2.5028e-13	22.9222
CENPN	1.18735	8.54575	9.58288	6.59984e-14	1.15217e-12	21.2391
MSI2	1.18689	8.11108	10.2689	4.53865e-15	1.03762e-13	23.9022
NANP	1.18655	7.53445	8.8562	1.17431e-12	1.56855e-11	18.3768
HSP90AB2P	1.18642	5.23572	6.08057	7.802e-08	3.8991e-07	7.3816
RBL1	1.18391	7.30625	7.56041	2.12823e-10	1.74771e-09	13.2154
GARS	1.18263	11.1766	13.3532	5.18062e-20	4.69548e-18	35.2212
NPM3	1.18257	8.92677	8.31075	1.0413e-11	1.14381e-10	16.2088
TEX10	1.18118	8.81263	12.2469	2.68513e-18	1.51029e-16	31.2968
KIAA0020	1.18043	9.44869	13.1443	1.07879e-19	8.96663e-18	34.4924
CHAF1B	1.17958	7.41715	9.37894	1.47457e-13	2.37807e-12	20.4396
CDR2L	1.17917	7.90128	6.77441	4.98858e-09	3.10821e-08	10.0935
NOP58	1.17838	10.3574	14.5798	7.81145e-22	1.26275e-19	39.3855
TRMT1	1.17823	9.21015	15.8351	1.2999e-23	4.23601e-21	43.4448
SNORA8	1.17604	8.07767	9.07155	4.9837e-13	7.18507e-12	19.2288
CMTM8	1.17508	7.31362	9.86162	2.21234e-14	4.29294e-13	22.3263
CDK4	1.17414	11.2439	11.3142	8.43996e-17	2.97208e-15	27.8671
POLR1B	1.17052	9.23851	15.6346	2.46756e-23	6.93958e-21	42.8101
C13orf23	1.16924	10.612	8.20371	1.60041e-11	1.68494e-10	15.7821
NELF	1.16563	10.3292	7.39726	4.10274e-10	3.16651e-09	12.565
YDJC	1.16423	8.65908	9.03865	5.67985e-13	8.04639e-12	19.0988
HAUS6	1.16321	8.68784	12.8522	3.03734e-19	2.1803e-17	33.4636
LIPG	1.16287	8.52947	6.01626	1.00385e-07	4.90458e-07	7.1336
CDCA2	1.16238	7.16314	5.46115	8.59862e-07	3.51513e-06	5.02542
TBX3	1.16207	8.86771	6.12986	6.42888e-08	3.26372e-07	7.57214
CHD7	1.16136	9.67938	8.0627	2.82041e-11	2.82868e-10	15.2197
BRCA1	1.16037	8.50736	8.64186	2.76357e-12	3.41372e-11	17.5264
SLC1A5	1.15568	12.0559	8.0936	2.49101e-11	2.53295e-10	15.343
CDCA4	1.15533	8.49307	9.06888	5.03699e-13	7.2568e-12	19.2182
TXNRD3IT1	1.15522	6.82049	8.64459	2.73359e-12	3.38076e-11	17.5372
KIFC2	1.15155	8.32963	6.18993	5.07576e-08	2.62747e-07	7.80484
EIF5A2	1.1497	7.24416	6.80363	4.43898e-09	2.7929e-08	10.2089
DLGAP5	1.14876	8.28552	6.75557	5.37848e-09	3.32595e-08	10.0192
EPHA1	1.14857	8.68641	6.70829	6.49572e-09	3.95601e-08	9.83273
AGAP3	1.14732	10.2554	15.0041	1.91357e-22	3.70619e-20	40.7805
GTPBP4	1.14689	9.97249	15.3128	6.97722e-23	1.60946e-20	41.7804
PPP2R3B	1.14647	7.01945	8.25455	1.30484e-11	1.40327e-10	15.9848
LMNB2	1.14599	11.2612	8.54469	4.07676e-12	4.8717e-11	17.1401
PRC1	1.14566	9.70444	7.66133	1.41786e-10	1.21896e-09	13.6179
FANCD2	1.14529	8.29674	7.35122	4.93703e-10	3.75815e-09	12.3817
FAM83H	1.14361	11.1912	6.15415	5.84337e-08	2.9894e-07	7.66616
POLD2	1.14314	10.9771	12.5948	7.62881e-19	4.9097e-17	32.5481
MGC72080	1.14308	6.50704	6.43304	1.94171e-08	1.08295e-07	8.75192
LIMK1	1.14301	9.50527	11.0284	2.47814e-16	7.79115e-15	26.7954
RCC1	1.14275	9.87013	8.4033	7.18377e-12	8.2026e-11	16.5775
RTEL1	1.14227	9.13198	5.78134	2.50755e-07	1.13267e-06	6.23384
NOL6	1.14139	10.1123	10.9349	3.53342e-16	1.06365e-14	26.4424
TRIM59	1.14127	7.29007	8.22381	1.47628e-11	1.56874e-10	15.8623
WDR77	1.14062	9.89424	10.5433	1.57602e-15	4.00938e-14	24.9547
CENPH	1.14042	7.59047	8.53876	4.17473e-12	4.98008e-11	17.1166
TCOF1	1.14029	10.3836	8.77562	1.61955e-12	2.10572e-11	18.0574
PPRC1	1.14005	9.90047	10.0875	9.17161e-15	1.9492e-13	23.2023
DCUN1D5	1.13921	8.40636	11.1582	1.5177e-16	5.02556e-15	27.2833
IRAK1	1.13851	11.7456	8.5151	4.58966e-12	5.44028e-11	17.0224
DEPDC1B	1.13849	7.8067	6.70512	6.57838e-09	4.00398e-08	9.82025
AMPD2	1.13809	9.68018	15.2077	9.82481e-23	2.14578e-20	41.4412
C8orf30A	1.13794	9.28942	9.5001	9.14247e-14	1.54261e-12	20.915
CDC25C	1.13701	6.86097	7.18236	9.73143e-10	6.96605e-09	11.7098
TMEM161A	1.13555	9.24146	13.92	7.28091e-21	8.74135e-19	37.1702
POLE2	1.13495	6.55735	6.32058	3.03107e-08	1.62913e-07	8.31281
NUSAP1	1.13483	9.41124	6.71937	6.21478e-09	3.8007e-08	9.87641
BRIX1	1.13289	9.35192	13.0183	1.68364e-19	1.30928e-17	34.0501
KIFC1	1.13146	9.25587	7.56045	2.12784e-10	1.74771e-09	13.2156
SLC35E4	1.13122	7.74574	7.24987	7.41987e-10	5.43647e-09	11.9783
NME1-NME2	1.13089	6.66481	6.54512	1.24423e-08	7.19346e-08	9.19101
TSPAN5	1.13017	6.22482	6.3993	2.21964e-08	1.223e-07	8.61998
UBE2CBP	1.12964	6.09978	9.86949	2.14535e-14	4.18669e-13	22.3569
SFXN3	1.12911	9.49041	9.96623	1.47061e-14	2.97162e-13	22.7326
CNN2	1.12895	11.4934	10.0645	1.00308e-14	2.11214e-13	23.1132
C1orf112	1.12828	7.23956	9.56119	7.18794e-14	1.2453e-12	21.1542
CBX3	1.12822	11.741	11.7004	1.9988e-17	8.60278e-16	29.3002
ADCY3	1.12517	9.96338	8.14357	2.0378e-11	2.10231e-10	15.5423
PLAGL2	1.12455	10.3367	6.20071	4.86466e-08	2.52775e-07	7.84668
CDC25A	1.12427	8.05726	6.65286	8.10244e-09	4.83978e-08	9.61445
MEST	1.12418	10.2912	8.17437	1.80056e-11	1.87642e-10	15.6651
C16orf55	1.12304	7.09015	12.4144	1.46229e-18	8.62667e-17	31.9012
BHLHE40	1.12297	11.1901	7.55201	2.20136e-10	1.79912e-09	13.1819
LAS1L	1.12137	9.77677	10.6676	9.78806e-16	2.61652e-14	25.4286
NT5DC2	1.12135	9.41895	8.32232	9.94072e-12	1.10018e-10	16.2549
SLC3A2	1.12101	11.2401	12.8687	2.86344e-19	2.08463e-17	33.5222
ZNF121	1.1198	5.53822	7.77865	8.84224e-11	7.9794e-10	14.0861
CCT6A	1.11979	12.0019	14.3722	1.56729e-21	2.38344e-19	38.6947
KCTD14	1.11839	8.68263	7.12984	1.20154e-09	8.46814e-09	11.5012
PIF1	1.11726	5.84899	5.68809	3.59732e-07	1.57503e-06	5.8796
WDHD1	1.11601	7.72779	8.42733	6.52397e-12	7.50768e-11	16.6731
PTTG1	1.1154	8.90667	7.08495	1.43871e-09	9.94165e-09	11.3229
TAF1D	1.11472	9.21232	12.4907	1.10986e-18	6.86308e-17	32.1754
NOC3L	1.11218	8.3569	12.7137	4.97941e-19	3.40758e-17	32.9722
WDR75	1.11195	9.46487	14.1166	3.72189e-21	5.027e-19	37.8363
DSN1	1.1117	8.77425	11.0177	2.58126e-16	8.06596e-15	26.7549
NBEAL2	1.11147	10.6774	7.13182	1.19203e-09	8.40398e-09	11.5091
MCM8	1.1111	8.05735	8.3379	9.33825e-12	1.03938e-10	16.317
SNHG12	1.11089	7.55967	6.33274	2.88879e-08	1.55743e-07	8.3602
SLC25A22	1.11044	9.10201	8.25836	1.28501e-11	1.38414e-10	16
NPRL3	1.11031	9.37501	11.9814	7.08754e-18	3.5062e-16	30.3315
MIF	1.10835	11.9177	6.45808	1.75813e-08	9.88344e-08	8.84988
RTKN	1.10731	9.89923	11.7826	1.47417e-17	6.637e-16	29.603
NOB1	1.10727	10.4355	13.7485	1.31255e-20	1.4786e-18	36.585
PSRC1	1.10673	7.2731	7.92662	4.87521e-11	4.64446e-10	14.6767
EIF2C2	1.10616	7.94955	8.14203	2.05044e-11	2.11323e-10	15.5361
NR2C2AP	1.10566	8.68793	12.1526	3.78686e-18	2.0513e-16	30.9549
FTSJ1	1.10476	9.39009	11.417	5.74097e-17	2.14685e-15	28.2505
RPP40	1.10471	6.82219	8.35826	8.60587e-12	9.64402e-11	16.3981
HSP90AB1	1.10418	14.4213	15.7599	1.65229e-23	5.06292e-21	43.2073
LOC100130776	1.10281	7.01159	7.90661	5.28395e-11	4.99445e-10	14.5968
C4orf21	1.10221	6.05585	7.31812	5.63988e-10	4.23661e-09	12.2499
GNL3L	1.10178	9.58888	10.4391	2.35287e-15	5.73686e-14	24.5559
DDX10	1.10172	9.01271	13.8047	1.08158e-20	1.24049e-18	36.7772
ICA1	1.10076	9.89501	8.14239	2.04749e-11	2.11125e-10	15.5376
CTPS	1.10059	9.31271	7.47228	3.03403e-10	2.40111e-09	12.864
ALKBH2	1.09928	7.80189	9.3968	1.37417e-13	2.23193e-12	20.5097
ARHGAP39	1.09885	8.21874	8.07019	2.73674e-11	2.75688e-10	15.2496
IPO4	1.09878	9.93981	9.09585	4.5252e-13	6.61226e-12	19.3247
C22orf29	1.09847	8.7913	9.82266	2.5764e-14	4.9387e-13	22.1748
KIAA0406	1.098	9.28852	10.069	9.85683e-15	2.07985e-13	23.1306
GLA	1.09785	8.96926	7.57431	2.01242e-10	1.66526e-09	13.2708
AGRN	1.09777	11.4603	7.22286	8.27047e-10	5.99891e-09	11.8709
CASC5	1.09659	7.48701	5.65693	4.0569e-07	1.76048e-06	5.76165
HAUS5	1.09619	8.15234	12.3502	1.84518e-18	1.06709e-16	31.6699
NAT10	1.09541	10.3887	13.531	2.78634e-20	2.84595e-18	35.8374
POLR1C	1.09503	8.98397	12.2031	3.14914e-18	1.72866e-16	31.1383
PODXL2	1.09481	9.18769	6.8745	3.34351e-09	2.1444e-08	10.489
SRM	1.09433	9.98193	10.067	9.932e-15	2.09347e-13	23.1231
CCNB1IP1	1.09383	9.51122	8.10878	2.34351e-11	2.39694e-10	15.4035
KCNJ11	1.09376	5.71966	5.92226	1.44949e-07	6.86692e-07	6.77234
PABPC3	1.09272	8.44388	10.8139	5.59909e-16	1.59652e-14	25.9844
ZC3H8	1.09248	7.16128	10.2718	4.48851e-15	1.0273e-13	23.9133
TCFL5	1.09157	8.20511	7.81204	7.73048e-11	7.06935e-10	14.2194
HEATR1	1.08966	9.71533	11.886	1.00677e-17	4.80673e-16	29.9824
POLR1A	1.08765	9.7894	8.36849	8.25977e-12	9.30941e-11	16.4389
HM13	1.08619	11.5777	9.36563	1.55417e-13	2.50056e-12	20.3873
GPSM2	1.08593	10.0559	6.88382	3.22105e-09	2.07104e-08	10.5259
OTUD6B	1.08358	8.19624	8.90343	9.72852e-13	1.32269e-11	18.5639
CIRH1A	1.08261	9.83492	12.9443	2.18844e-19	1.65179e-17	33.7894
WDR74	1.08161	9.19734	16.8049	6.26608e-25	3.38533e-22	46.4443
C7orf47	1.08157	8.03516	9.78637	2.9697e-14	5.63474e-13	22.0335
GPX2	1.08113	13.1165	5.78427	2.47924e-07	1.12087e-06	6.24499
ZNF485	1.07942	5.89008	8.8511	1.19844e-12	1.59766e-11	18.3566
SLC25A32	1.07877	9.11142	11.1202	1.75144e-16	5.71713e-15	27.1408
PALB2	1.0776	8.24956	15.4962	3.85315e-23	9.82087e-21	42.3687
NCAPD3	1.07685	9.47085	10.62	1.17429e-15	3.07804e-14	25.2474
CDKN3	1.07657	7.86212	5.90815	1.53147e-07	7.21953e-07	6.71826
TRAIP	1.07472	6.82037	8.4862	5.15287e-12	6.0589e-11	16.9075
PRR22	1.07391	5.19521	5.55452	6.01529e-07	2.53113e-06	5.37544
PPAN	1.07301	9.12919	12.2967	2.24082e-18	1.26385e-16	31.4767
TIMELESS	1.07241	9.48887	9.07704	4.87629e-13	7.06495e-12	19.2504
ZNF367	1.07227	7.73652	7.91377	5.13387e-11	4.86828e-10	14.6254
UGGT2	1.07191	8.41019	8.41709	6.79732e-12	7.78733e-11	16.6324
FAM57A	1.07114	8.75898	6.25787	3.88304e-08	2.04828e-07	8.0687
TGDS	1.07053	8.24685	7.52181	2.48576e-10	2.00679e-09	13.0615
GNL3	1.06929	10.6753	10.9536	3.2907e-16	9.99379e-15	26.5132
PDCD11	1.06845	10.0536	8.84547	1.22566e-12	1.63078e-11	18.3343
RAD18	1.0683	8.0828	13.104	1.24342e-19	1.00899e-17	34.3513
CDCA8	1.06688	9.28726	7.59454	1.85504e-10	1.54562e-09	13.3515
PDRG1	1.06668	8.84555	8.02538	3.2771e-11	3.23923e-10	15.0708
SNHG11	1.06499	7.33475	8.07499	2.68446e-11	2.71221e-10	15.2687
HYAL3	1.06417	6.06464	7.2637	7.01875e-10	5.1684e-09	12.0333
DDX27	1.06361	10.4868	7.09392	1.38786e-09	9.62265e-09	11.3585
DNTTIP1	1.06325	9.85042	7.8005	8.098e-11	7.38569e-10	14.1733
SPRY4	1.06319	9.5231	8.22307	1.48068e-11	1.5726e-10	15.8593
RIN1	1.06305	8.36151	7.40007	4.05657e-10	3.13678e-09	12.5763
MCM4	1.06204	10.5973	8.2821	1.1682e-11	1.27029e-10	16.0946
ECE2	1.0619	7.92354	8.07475	2.68705e-11	2.71348e-10	15.2678
CDK2	1.06095	9.38226	13.468	3.47026e-20	3.34481e-18	35.6193
CHEK1	1.05932	8.16282	11.4148	5.78812e-17	2.15662e-15	28.2424
FAM188B	1.05777	7.09491	5.54966	6.12841e-07	2.57504e-06	5.35718
CCDC41	1.05636	7.72579	10.1491	7.21966e-15	1.57848e-13	23.4404
DUS4L	1.05618	6.95559	12.4223	1.42133e-18	8.45662e-17	31.9294
PNO1	1.0538	9.06869	9.28769	2.11518e-13	3.30225e-12	20.0809
NCAPG	1.05319	8.42526	6.34916	2.70702e-08	1.46597e-07	8.42426
POLA1	1.05307	8.8818	8.69317	2.2511e-12	2.83355e-11	17.7302
EIF3B	1.05214	12.072	11.4577	4.93155e-17	1.8749e-15	28.4017
SLC7A6	1.0496	10.0518	8.42801	6.5061e-12	7.49132e-11	16.6759
TGS1	1.04879	9.22242	12.4634	1.22512e-18	7.46344e-17	32.0771
PRDX4	1.04704	10.833	7.05092	1.64919e-09	1.1286e-08	11.1879
RFWD3	1.04617	9.72783	12.5747	8.20068e-19	5.24486e-17	32.4762
WDR12	1.04535	9.05566	10.6488	1.05165e-15	2.78226e-14	25.3572
SDCCAG3	1.04524	9.43415	12.0263	6.01102e-18	3.04338e-16	30.4954
ATXN7L2	1.04419	6.18955	8.50343	4.8093e-12	5.6875e-11	16.976
RRP1	1.04379	9.15885	12.098	4.62338e-18	2.44005e-16	30.7564
FAM111B	1.04278	8.13743	5.95859	1.25783e-07	6.02221e-07	6.91178
NPHP4	1.04102	7.83054	7.56239	2.11133e-10	1.7373e-09	13.2233
METTL11A	1.04078	8.92999	9.83167	2.48719e-14	4.79006e-13	22.2098
MKI67IP	1.04078	9.69624	13.5443	2.66122e-20	2.77241e-18	35.883
LRP11	1.03859	9.9396	8.74053	1.86311e-12	2.3921e-11	17.9181
CDC7	1.03853	7.07567	5.76429	2.67893e-07	1.20294e-06	6.16892
FAM84B	1.03816	10.1143	7.26074	7.10265e-10	5.22269e-09	12.0216
SUV39H1	1.03812	8.24879	10.0508	1.05805e-14	2.20749e-13	23.0601
GALK1	1.03793	8.3992	8.00665	3.53341e-11	3.47252e-10	14.9961
GSG2	1.03769	6.15137	6.19296	5.01553e-08	2.59825e-07	7.8166
NOP16	1.03768	8.5202	9.11204	4.24348e-13	6.22826e-12	19.3886
IL1RAP	1.03712	7.13765	9.57608	6.77891e-14	1.17842e-12	21.2125
GGCT	1.03623	10.1636	9.92531	1.72513e-14	3.4352e-13	22.5738
RCL1	1.03479	8.36335	11.6777	2.17381e-17	9.20173e-16	29.2167
GTPBP3	1.03335	8.3071	11.7567	1.62263e-17	7.164e-16	29.5076
ARMC10	1.03262	9.55273	12.0667	5.1832e-18	2.72151e-16	30.6427
HAUS7	1.02976	8.49214	8.36392	8.41272e-12	9.45855e-11	16.4206
C8orf55	1.02856	9.91778	7.25313	7.32337e-10	5.37536e-09	11.9913
DBF4B	1.02797	6.95796	8.16919	1.83845e-11	1.90913e-10	15.6445
SERPINH1	1.02722	11.5433	6.92928	2.68515e-09	1.75673e-08	10.7058
PRMT3	1.02707	8.49556	10.5198	1.7248e-15	4.33416e-14	24.8649
C20orf134	1.02671	6.17691	5.57794	5.49811e-07	2.32975e-06	5.46356
RACGAP1	1.0265	9.8884	10.5094	1.79546e-15	4.47642e-14	24.825
FMNL2	1.02617	9.36365	9.52593	8.25818e-14	1.41155e-12	21.0162
E2F3	1.02613	8.82161	10.8696	4.52876e-16	1.32444e-14	26.1955
LOC146880	1.02607	8.17302	6.77964	4.88545e-09	3.04766e-08	10.1142
C14orf79	1.02586	6.81026	9.35368	1.62935e-13	2.61333e-12	20.3403
ZNF598	1.02572	10.0635	11.3275	8.02758e-17	2.84873e-15	27.917
PABPC1	1.02518	14.8408	11.1401	1.62478e-16	5.36084e-15	27.2154
CCDC99	1.02497	7.71396	9.7843	2.99383e-14	5.67528e-13	22.0254
EIF2S2	1.02464	11.016	9.87219	2.1228e-14	4.15454e-13	22.3674
CEBPB	1.02463	9.4478	7.56961	2.05088e-10	1.69367e-09	13.2521
KIF15	1.02461	8.003	6.89268	3.10882e-09	2.00705e-08	10.5609
LTB4R	1.02452	6.31089	6.18089	5.25973e-08	2.71312e-07	7.76978
DDX56	1.02452	10.3962	15.6693	2.20795e-23	6.29573e-21	42.9202
URB1	1.02428	9.65012	7.85747	6.43915e-11	5.96821e-10	14.4007
TIMM16	1.02406	7.97202	7.86824	6.16607e-11	5.73322e-10	14.4437
EIF4EBP1	1.02399	9.50062	7.33489	5.27211e-10	3.98367e-09	12.3167
KIF11	1.02308	9.28562	6.50179	1.47805e-08	8.39167e-08	9.02108
DDX55	1.02253	8.60333	11.7398	1.72723e-17	7.58684e-16	29.4454
CLCN5	1.02147	8.4179	6.45011	1.81463e-08	1.01677e-07	8.81868
ARHGAP11B	1.02117	5.0805	5.49119	7.6663e-07	3.16615e-06	5.13782
TXLNG	1.02117	7.72967	6.20685	4.74837e-08	2.4717e-07	7.87051
SLC19A1	1.02043	8.70116	6.14717	6.006e-08	3.06572e-07	7.63913
AMMECR1	1.02043	8.78356	9.9283	1.70513e-14	3.40198e-13	22.5854
DNMT1	1.02032	10.5409	8.12687	2.17917e-11	2.23692e-10	15.4757
RFC4	1.01924	8.29037	10.5791	1.37359e-15	3.5516e-14	25.0915
ATP6V1E2	1.019	5.01134	6.61961	9.25015e-09	5.46334e-08	9.48365
PLK4	1.01756	7.67126	7.10559	1.32437e-09	9.22296e-09	11.4049
ZNF74	1.01666	7.92715	10.0481	1.06928e-14	2.22867e-13	23.0496
RANGAP1	1.01612	10.9753	11.2915	9.19113e-17	3.1874e-15	27.7823
MCM3	1.01578	11.2141	11.8242	1.26411e-17	5.87563e-16	29.7559
TMEM41A	1.01572	9.20254	13.7998	1.10016e-20	1.25479e-18	36.7603
ZNF593	1.01493	8.66658	7.86503	6.2461e-11	5.79975e-10	14.4309
IARS	1.0149	11.3787	10.7607	6.85651e-16	1.90222e-14	25.7828
LRRC61	1.01468	8.44996	9.18536	3.17239e-13	4.77137e-12	19.6778
PASK	1.01421	7.74285	7.887	5.7177e-11	5.36737e-10	14.5185
MTAP	1.01408	9.31403	11.6702	2.23576e-17	9.38728e-16	29.1887
CEP250	1.01263	9.42221	5.92148	1.45387e-07	6.88532e-07	6.76938
FOXRED2	1.01182	8.43075	7.28774	6.37247e-10	4.72811e-09	12.129
KIF20B	1.01179	8.42745	7.15089	1.10421e-09	7.83599e-09	11.5848
DPY19L1	1.01079	9.7709	9.54762	7.58228e-14	1.307e-12	21.1011
CXCL16	1.01052	10.4163	7.05439	1.62638e-09	1.11367e-08	11.2016
PPA1	1.00856	12.0655	8.95602	7.89013e-13	1.09154e-11	18.7721
WDR3	1.00789	9.56215	10.9681	3.11506e-16	9.5451e-15	26.5678
SNHG6	1.00721	9.64642	6.35369	2.659e-08	1.44264e-07	8.44191
CLPB	1.00693	8.00942	9.61871	5.73251e-14	1.01807e-12	21.3793
TM4SF1	1.0063	10.9479	5.89086	1.6382e-07	7.68384e-07	6.65205
PTCD1	1.00513	8.96389	13.4011	4.38234e-20	4.08952e-18	35.3875
NOM1	1.00497	8.95647	12.3292	1.99123e-18	1.1419e-16	31.5941
GPR172A	1.00468	10.8097	7.4223	3.70959e-10	2.89134e-09	12.6648
CD46	1.00466	12.7797	8.34866	8.94387e-12	9.98464e-11	16.3598
ZMIZ2	1.00335	11.2721	9.31723	1.88194e-13	2.95836e-12	20.197
SUV39H2	1.00323	7.65937	11.2845	9.43373e-17	3.26601e-15	27.7564
PRPS1	1.002	9.36836	8.17979	1.76177e-11	1.83693e-10	15.6868
FOXP4	1.00165	11.0424	8.35977	8.55392e-12	9.59545e-11	16.4041
NSUN5	1.00003	9.36531	13.3601	5.05681e-20	4.61405e-18	35.2453
CA1	-9.25241	9.41417	-12.6985	5.25906e-19	3.57511e-17	32.9179
OTOP2	-8.72576	5.46436	-26.5383	7.57273e-36	7.77341e-32	71.0093
AQP8	-8.4509	8.66272	-11.9882	6.91312e-18	3.43778e-16	30.3563
CLCA4	-7.98189	9.59397	-12.0332	5.86182e-18	3.00048e-16	30.5204
MS4A12	-7.73592	8.42204	-12.0431	5.65132e-18	2.91512e-16	30.5567
TMIGD1	-7.72142	6.73173	-15.0471	1.6618e-22	3.37791e-20	40.9203
CA4	-7.65188	8.6767	-11.6174	2.71918e-17	1.10984e-15	28.994
ZG16	-7.62968	10.3523	-10.2045	5.82526e-15	1.30275e-13	23.6539
PYY	-7.61896	6.74621	-14.1621	3.18894e-21	4.39388e-19	37.9897
GUCA2B	-7.54818	6.7028	-14.8632	3.0452e-22	5.43635e-20	40.3198
CA7	-7.43307	7.20408	-22.294	1.52648e-31	6.26774e-28	61.4042
GCG	-6.77881	6.45408	-12.3965	1.56042e-18	9.17923e-17	31.8366
SLC26A3	-6.67127	12.3449	-9.46408	1.05373e-13	1.75783e-12	20.7738
CD177	-6.62605	9.47286	-10.6698	9.70699e-16	2.59823e-14	25.4369
CHGA	-6.51392	9.05506	-10.5971	1.28203e-15	3.33166e-14	25.1601
BEST4	-6.50555	6.87838	-23.205	1.61159e-32	8.2715e-29	63.594
CLDN8	-6.37504	6.37539	-9.68152	4.47929e-14	8.14525e-13	21.6246
GUCA2A	-6.35339	9.71612	-13.38	4.71674e-20	4.32298e-18	35.3144
SLC6A19	-6.17501	5.61836	-10.3264	3.63453e-15	8.51792e-14	24.1233
PLP1	-6.06943	6.05678	-15.081	1.48677e-22	3.08318e-20	41.0306
SLC4A4	-5.99512	9.29243	-13.0446	1.53373e-19	1.21573e-17	34.1428
SCGN	-5.98375	5.38769	-17.8734	2.52086e-26	2.07013e-23	49.6165
SST	-5.95046	5.05679	-15.7271	1.83499e-23	5.45976e-21	43.1034
BMP3	-5.82713	7.11053	-13.6465	1.86678e-20	2.01711e-18	36.2352
CEACAM7	-5.72434	12.3775	-11.9903	6.85876e-18	3.4344e-16	30.3641
CA2	-5.69882	11.7	-15.1892	1.04341e-22	2.25487e-20	41.3816
CWH43	-5.64249	6.67718	-11.1656	1.47597e-16	4.90318e-15	27.311
ADH1B	-5.59944	8.98339	-11.3523	7.31638e-17	2.62069e-15	28.0093
CDKN2BAS	-5.57395	6.42644	-12.6232	6.88988e-19	4.49045e-17	32.6494
ADH1C	-5.50316	10.0012	-10.1388	7.51422e-15	1.63073e-13	23.4006
ATP1A2	-5.48837	6.51459	-10.426	2.47473e-15	5.99838e-14	24.5057
SCNN1B	-5.47103	8.39269	-10.9957	2.80556e-16	8.67441e-15	26.6719
ABCA8	-5.37723	6.96268	-13.915	7.40625e-21	8.84013e-19	37.1532
MT1M	-5.3408	7.20748	-11.9209	8.85142e-18	4.28584e-16	30.1104
MAMDC2	-5.34069	6.46831	-14.2881	2.08105e-21	2.96694e-19	38.4133
SPIB	-5.3399	6.95797	-13.9531	6.50021e-21	7.95836e-19	37.2828
B4GALNT2	-5.33111	6.34859	-8.83712	1.26714e-12	1.68269e-11	18.3012
SCN7A	-5.28796	5.69595	-11.3892	6.37088e-17	2.34398e-15	28.1469
PRIMA1	-5.28506	5.91142	-13.2408	7.68041e-20	6.56995e-18	34.83
SCARA5	-5.27686	8.15416	-13.3276	5.66613e-20	5.05764e-18	35.1322
CADM3	-5.27573	6.81381	-13.5312	2.78465e-20	2.84595e-18	35.838
BEST2	-5.26175	6.401	-9.75021	3.42154e-14	6.40914e-13	21.8926
GPM6A	-5.217	5.32527	-10.1951	6.04003e-15	1.34492e-13	23.6179
CHP2	-5.18107	9.98412	-9.1926	3.08265e-13	4.64661e-12	19.7064
CLCA1	-5.17582	12.0215	-6.39853	2.22641e-08	1.22545e-07	8.61698
PI16	-5.16426	6.30005	-13.0697	1.40391e-19	1.13029e-17	34.2307
UGT2A3	-5.13901	8.4436	-10.6998	8.65262e-16	2.3457e-14	25.5513
C11orf86	-5.06492	6.42081	-10.944	3.41293e-16	1.03338e-14	26.477
CNTFR	-5.03761	5.19697	-11.9478	8.01764e-18	3.90979e-16	30.2088
FAM55D	-5.01963	9.35236	-9.06472	5.12089e-13	7.35702e-12	19.2018
UGT1A8	-4.98387	6.75227	-13.567	2.45897e-20	2.57564e-18	35.9615
OGN	-4.96309	7.44041	-10.6608	1.00452e-15	2.67133e-14	25.4028
TRPM6	-4.86152	8.03514	-10.5071	1.81164e-15	4.50824e-14	24.816
CASQ2	-4.86092	6.11626	-8.51378	4.61402e-12	5.466e-11	17.0172
SFRP1	-4.84141	7.78127	-10.3604	3.18705e-15	7.5207e-14	24.254
ALPI	-4.82941	6.52746	-12.6422	6.43402e-19	4.24728e-17	32.7175
AKR1B10	-4.76632	8.79568	-10.7341	7.589e-16	2.0746e-14	25.6818
DHRS9	-4.75551	8.93409	-10.779	6.39593e-16	1.80581e-14	25.852
ANGPTL1	-4.74899	6.57727	-11.0712	2.10812e-16	6.76244e-15	26.9563
IGJ	-4.69809	13.6881	-9.27707	2.20604e-13	3.43106e-12	20.039
PCOLCE2	-4.69683	5.55218	-11.3914	6.31964e-17	2.33349e-15	28.155
GBA3	-4.68945	5.23615	-10.9597	3.21585e-16	9.78094e-15	26.5361
WISP2	-4.67654	5.44488	-11.5145	3.9885e-17	1.5479e-15	28.6129
VSIG2	-4.66941	9.44611	-8.70561	2.14195e-12	2.71512e-11	17.7795
OSTBETA	-4.6557	7.12554	-12.1005	4.5803e-18	2.42354e-16	30.7657
NBLA00301	-4.65548	5.54266	-8.93102	8.71598e-13	1.19852e-11	18.6731
PRPH	-4.59602	5.66876	-12.7548	4.2998e-19	2.96224e-17	33.1181
NPTX1	-4.5836	5.89815	-8.10324	2.39632e-11	2.44394e-10	15.3814
ABCG2	-4.55927	7.4517	-12.3021	2.19707e-18	1.24602e-16	31.4963
FXYD1	-4.54938	5.31912	-12.9635	2.04468e-19	1.5605e-17	33.857
C16orf89	-4.52806	5.38392	-11.7759	1.51145e-17	6.78996e-16	29.5782
MYH11	-4.51754	13.6011	-8.39541	7.41473e-12	8.42882e-11	16.546
SLC26A2	-4.50091	12.2984	-11.6897	2.07938e-17	8.93088e-16	29.2609
ITLN1	-4.50014	10.315	-6.22699	4.38607e-08	2.29534e-07	7.94869
DES	-4.48376	12.2361	-7.10824	1.31036e-09	9.14093e-09	11.4154
PKIB	-4.48038	8.84608	-15.9125	1.01629e-23	3.42039e-21	43.6885
RSPO2	-4.46834	5.13359	-13.8261	1.00495e-20	1.15908e-18	36.8502
CNR1	-4.46553	5.17862	-12.48	1.15389e-18	7.0722e-17	32.1367
BCHE	-4.43267	5.94089	-11.3273	8.03418e-17	2.84873e-15	27.9161
GPT	-4.43081	8.02344	-12.7975	3.69052e-19	2.57709e-17	33.27
SLC9A3	-4.36236	8.48822	-6.46358	1.72016e-08	9.68063e-08	8.87141
LYVE1	-4.35787	7.80686	-13.2297	7.9864e-20	6.80335e-18	34.7912
PDE6A	-4.34643	5.14492	-12.8799	2.75156e-19	2.02471e-17	33.5619
C7	-4.33722	8.80304	-9.18795	3.13994e-13	4.72949e-12	19.688
SULT1A2	-4.2909	6.19861	-15.4635	4.28211e-23	1.07209e-20	42.2641
MT1H	-4.27673	6.64761	-9.04089	5.62946e-13	7.99719e-12	19.1076
SI	-4.27252	8.06233	-5.87388	1.75021e-07	8.15152e-07	6.58705
ANO5	-4.26378	6.00806	-14.1246	3.62262e-21	4.92532e-19	37.8631
ANPEP	-4.26088	11.3211	-10.4299	2.43767e-15	5.92254e-14	24.5207
SYNM	-4.23648	10.3276	-7.53666	2.34162e-10	1.90239e-09	13.1207
FABP1	-4.22755	13.2363	-8.57568	3.60123e-12	4.35927e-11	17.2634
DPT	-4.22109	8.88988	-9.63104	5.4614e-14	9.76677e-13	21.4274
HBA1	-4.21984	6.22377	-7.13898	1.15828e-09	8.18853e-09	11.5375
C6orf105	-4.20774	8.58457	-10.6996	8.6607e-16	2.3457e-14	25.5504
LOC646627	-4.20523	8.53313	-8.64577	2.72073e-12	3.36891e-11	17.5419
STMN2	-4.19651	7.04179	-11.6696	2.24051e-17	9.38728e-16	29.1866
GREM2	-4.16292	7.95202	-10.7577	6.9367e-16	1.91928e-14	25.7712
PLIN4	-4.15069	7.35266	-6.47077	1.67175e-08	9.42369e-08	8.89958
CLEC3B	-4.1474	8.61919	-18.57	3.32468e-27	3.25027e-24	51.6128
TMEM35	-4.13307	6.10239	-9.22846	2.67426e-13	4.08198e-12	19.8477
SLC25A34	-4.11611	6.09017	-15.4202	4.92556e-23	1.20383e-20	42.1254
UGT1A10	-4.0921	8.97607	-12.6289	6.7496e-19	4.41304e-17	32.6698
PDZRN4	-4.07073	5.45777	-8.03901	3.10226e-11	3.07529e-10	15.1252
GCNT2	-4.05167	6.75768	-19.8604	8.94127e-29	1.41203e-25	55.1678
FAM5C	-4.03512	5.16651	-7.46178	3.16491e-10	2.50002e-09	12.8221
PYGM	-4.0245	5.56581	-9.78774	2.95381e-14	5.60979e-13	22.0388
ABCC13	-3.93891	5.0619	-11.9353	8.39666e-18	4.07526e-16	30.1629
TMEM82	-3.93452	5.92937	-11.735	1.75794e-17	7.69519e-16	29.4279
LDB3	-3.929	6.10296	-8.73206	1.92718e-12	2.46665e-11	17.8845
HAND2	-3.92856	6.59386	-7.53875	2.32204e-10	1.88798e-09	13.129
VIP	-3.9126	8.08369	-9.99466	1.3164e-14	2.69448e-13	22.8428
TNXB	-3.89869	9.5537	-10.1737	6.56274e-15	1.44719e-13	23.5353
LMO3	-3.89313	6.76059	-7.24553	7.55023e-10	5.51427e-09	11.9611
USP2	-3.87388	6.90096	-14.1895	2.90615e-21	4.05872e-19	38.0819
FAM189A1	-3.8663	6.19838	-10.1893	6.17852e-15	1.37107e-13	23.5953
PTGDR	-3.85481	5.86522	-12.2231	2.92876e-18	1.62506e-16	31.2105
HMGCS2	-3.85145	11.7741	-8.30109	1.08248e-11	1.18462e-10	16.1703
CTSG	-3.84726	5.37883	-9.86862	2.15268e-14	4.19304e-13	22.3535
SCN9A	-3.84559	6.67378	-15.0273	1.77341e-22	3.46744e-20	40.8559
EPHA7	-3.84425	6.32855	-7.99942	3.63773e-11	3.5631e-10	14.9672
CHGB	-3.82502	6.38681	-8.8979	9.94515e-13	1.34857e-11	18.542
GDPD2	-3.81765	6.19524	-10.141	7.45063e-15	1.62035e-13	23.4091
LGALS2	-3.81011	7.44176	-7.64657	1.50462e-10	1.28445e-09	13.5591
FAM23A	-3.80469	8.65576	-10.7677	6.6757e-16	1.86465e-14	25.8094
FABP4	-3.80347	6.10087	-7.01782	1.88322e-09	1.27389e-08	11.0566
HSD17B2	-3.8026	9.13801	-9.49875	9.19123e-14	1.54923e-12	20.9097
PLAC9	-3.79656	5.58651	-13.067	1.41733e-19	1.13664e-17	34.2212
C1orf95	-3.79011	5.06391	-8.42596	6.55982e-12	7.54471e-11	16.6677
LRRN2	-3.78856	7.31996	-11.6833	2.12926e-17	9.12603e-16	29.2373
PSD	-3.77006	7.32393	-7.3699	4.57982e-10	3.50573e-09	12.4561
C2orf88	-3.76634	9.02581	-15.4944	3.87477e-23	9.82087e-21	42.3632
CNTN3	-3.76161	5.48177	-12.7863	3.84224e-19	2.67394e-17	33.23
DNASE1L3	-3.75314	6.87218	-8.20006	1.62403e-11	1.70632e-10	15.7676
EDN3	-3.75008	8.18013	-10.9642	3.16122e-16	9.6577e-15	26.5532
TMEM100	-3.74858	5.97909	-13.675	1.69154e-20	1.85707e-18	36.3331
HBB	-3.69846	9.06187	-10.5784	1.37744e-15	3.55709e-14	25.0887
MT1E	-3.69462	9.91052	-9.59296	6.34331e-14	1.11497e-12	21.2786
TNFRSF17	-3.69239	5.87468	-8.85629	1.1739e-12	1.56855e-11	18.3772
PLAC8	-3.69077	10.3378	-9.2762	2.21361e-13	3.43763e-12	20.0356
SLC17A4	-3.68857	7.38249	-10.2983	4.05121e-15	9.37671e-14	24.0153
MT1G	-3.68693	10.2325	-8.93025	8.74264e-13	1.20138e-11	18.6701
MYOM1	-3.68567	6.24861	-10.2452	4.97426e-15	1.12717e-13	23.811
CNN1	-3.68395	11.0806	-7.14913	1.11202e-09	7.88594e-09	11.5778
ADCY5	-3.68318	6.58298	-10.9436	3.41776e-16	1.03338e-14	26.4756
TACR2	-3.68185	7.00552	-6.86443	3.48096e-09	2.22422e-08	10.4492
PADI2	-3.67919	11.2449	-12.7012	5.20753e-19	3.55185e-17	32.9277
HSPB6	-3.67878	9.36451	-8.17081	1.82648e-11	1.89861e-10	15.6509
PNCK	-3.67522	5.17647	-5.76674	2.65362e-07	1.1921e-06	6.17824
ACTG2	-3.66848	12.251	-6.77215	5.03379e-09	3.13257e-08	10.0846
OSTalpha	-3.66374	6.11643	-6.75697	5.34854e-09	3.31039e-08	10.0247
SYNPO2	-3.65745	11.0481	-7.99375	3.72164e-11	3.63133e-10	14.9446
DPP10	-3.65376	5.02107	-6.94276	2.54405e-09	1.67455e-08	10.7591
ABI3BP	-3.65264	8.19196	-10.7391	7.44655e-16	2.04109e-14	25.7007
FABP2	-3.64571	8.09682	-7.97952	3.94079e-11	3.81985e-10	14.8878
MOGAT2	-3.63783	7.462	-8.29122	1.1262e-11	1.22984e-10	16.131
SLC13A2	-3.63151	7.21475	-6.52583	1.34338e-08	7.71675e-08	9.11534
CHRDL1	-3.60173	8.61963	-8.29661	1.10211e-11	1.20545e-10	16.1525
BMX	-3.56084	5.18607	-16.2479	3.52699e-24	1.44818e-21	44.7358
PIGR	-3.54705	15.5377	-6.16466	5.60665e-08	2.87977e-07	7.70688
CP	-3.51638	6.61	-10.0176	1.20391e-14	2.48711e-13	22.9317
B3GNT7	-3.50501	10.7215	-7.61353	1.71856e-10	1.4448e-09	13.4273
CILP	-3.50295	7.64695	-7.58273	1.94538e-10	1.61368e-09	13.3044
FAM55A	-3.49485	8.43568	-7.73261	1.06425e-10	9.40906e-10	13.9024
GRIK3	-3.48499	5.33468	-11.31	8.5725e-17	3.00844e-15	27.8516
MMP28	-3.48298	8.30394	-11.4257	5.55865e-17	2.09186e-15	28.2826
BTNL8	-3.48291	8.49267	-8.84946	1.20631e-12	1.60712e-11	18.3501
LDHD	-3.47996	8.56177	-12.1429	3.92338e-18	2.11409e-16	30.9197
SPEG	-3.4757	7.43243	-7.35027	4.95601e-10	3.7684e-09	12.3779
GFRA2	-3.47233	5.43005	-14.0056	5.43308e-21	6.9105e-19	37.4608
PRKAA2	-3.4715	5.93999	-8.91467	9.3024e-13	1.27065e-11	18.6084
LMOD1	-3.44906	10.2938	-8.43661	6.28559e-12	7.26185e-11	16.7101
HIF3A	-3.44614	5.6743	-9.94672	1.5869e-14	3.18776e-13	22.6569
MMRN1	-3.44212	7.60023	-10.4706	2.0844e-15	5.15575e-14	24.6765
MADCAM1	-3.43962	5.07291	-10.3837	2.9136e-15	6.92757e-14	24.3432
HPGDS	-3.43587	5.10601	-13.3513	5.21465e-20	4.69548e-18	35.2147
LOC389332	-3.43573	6.10679	-8.4963	4.94861e-12	5.8374e-11	16.9476
MASP1	-3.43183	7.10006	-6.97992	2.19218e-09	1.45743e-08	10.9063
HRASLS2	-3.42655	5.19439	-9.65128	5.04405e-14	9.09169e-13	21.5065
FCGBP	-3.42545	14.3592	-5.8368	2.02177e-07	9.31692e-07	6.44533
RBPMS2	-3.42138	6.74765	-8.2474	1.34281e-11	1.43958e-10	15.9563
FAM107A	-3.42048	7.46532	-13.6283	1.9883e-20	2.13716e-18	36.1725
CFD	-3.41914	9.51395	-13.391	4.53875e-20	4.19733e-18	35.3527
WSCD1	-3.40058	7.88035	-12.0766	4.99911e-18	2.63158e-16	30.6787
PDZD4	-3.39967	5.81865	-11.5067	4.10709e-17	1.58792e-15	28.5837
SGCA	-3.38853	5.45537	-8.45919	5.74178e-12	6.67868e-11	16.8
GNAO1	-3.38497	7.43571	-8.87881	1.07313e-12	1.44468e-11	18.4664
PCSK1N	-3.37824	5.05513	-7.41955	3.75082e-10	2.91904e-09	12.6539
GFRA1	-3.36218	7.04891	-9.45051	1.11167e-13	1.83905e-12	20.7206
LRRC19	-3.36217	9.61469	-10.6817	9.27244e-16	2.50144e-14	25.4825
GALNTL1	-3.35635	5.03269	-9.55331	7.41428e-14	1.28019e-12	21.1234
PGM5	-3.35393	9.28369	-8.11704	2.26701e-11	2.32244e-10	15.4365
ANK2	-3.35064	7.65818	-10.5215	1.71396e-15	4.31221e-14	24.8712
EYA2	-3.3496	6.65199	-8.72736	1.96367e-12	2.50554e-11	17.8659
RETNLB	-3.34401	6.83498	-5.58709	5.3081e-07	2.25669e-06	5.49803
ADAMDEC1	-3.34032	10.4875	-9.83652	2.44046e-14	4.70889e-13	22.2287
BTNL3	-3.34029	8.50033	-8.19534	1.65509e-11	1.73539e-10	15.7488
HPGD	-3.33806	10.2478	-13.208	8.61935e-20	7.28211e-18	34.7154
FHL1	-3.31392	10.4866	-9.94389	1.60452e-14	3.21373e-13	22.6459
HSPB8	-3.30882	8.8463	-7.56308	2.10541e-10	1.73312e-09	13.2261
CHST5	-3.30155	8.80597	-6.35718	2.62254e-08	1.42376e-07	8.45552
HHLA2	-3.30151	10.114	-9.75102	3.41063e-14	6.39454e-13	21.8958
LIFR	-3.2944	7.61584	-13.4132	4.19979e-20	3.95512e-18	35.4298
CCL14	-3.28918	7.07104	-11.4255	5.56107e-17	2.09186e-15	28.2822
KCNMA1	-3.27586	9.2396	-8.4205	6.70489e-12	7.69863e-11	16.646
PCK1	-3.27403	10.5602	-8.10365	2.3924e-11	2.44116e-10	15.383
RELN	-3.2697	5.52507	-8.38072	7.86464e-12	8.90083e-11	16.4875
PLN	-3.26832	8.33174	-7.02333	1.84208e-09	1.24894e-08	11.0784
HEPACAM2	-3.26768	9.09713	-5.75459	2.78146e-07	1.24489e-06	6.13205
ADAMTSL3	-3.25662	6.69614	-8.35744	8.63437e-12	9.67068e-11	16.3948
SLC23A1	-3.25563	5.13965	-10.4992	1.8676e-15	4.64187e-14	24.7858
OSR1	-3.25009	5.34106	-9.51385	8.66043e-14	1.47428e-12	20.9689
C10orf99	-3.2437	10.7212	-7.16192	1.05635e-09	7.52496e-09	11.6286
MT1F	-3.23814	8.1419	-9.50233	9.06271e-14	1.5326e-12	20.9237
ABCA6	-3.23131	5.29103	-8.72389	1.99112e-12	2.53898e-11	17.8521
OMD	-3.22603	5.09305	-7.61294	1.72269e-10	1.44768e-09	13.4249
AFF3	-3.21146	5.79041	-9.96988	1.44988e-14	2.93551e-13	22.7467
DCLK1	-3.20866	6.12935	-10.3097	3.87719e-15	9.0248e-14	24.059
TPSG1	-3.17436	7.05718	-6.34318	2.77191e-08	1.49677e-07	8.40091
PLAC2	-3.17101	5.21903	-10.744	7.30918e-16	2.00612e-14	25.7192
GSTA1	-3.16133	5.76238	-6.46042	1.74186e-08	9.79738e-08	8.85905
NCAM1	-3.15972	7.35118	-9.55524	7.35799e-14	1.27369e-12	21.131
SEMA6D	-3.15938	8.19735	-11.0339	2.42743e-16	7.66694e-15	26.816
GSTM5	-3.15818	5.99374	-11.3735	6.75604e-17	2.47681e-15	28.0885
CLEC10A	-3.15528	6.76651	-9.24263	2.52826e-13	3.87642e-12	19.9035
FER1L6	-3.15442	6.82983	-5.78075	2.51334e-07	1.13454e-06	6.23157
ASB2	-3.1448	7.48863	-10.101	8.70434e-15	1.8634e-13	23.2543
KCNMB1	-3.14137	7.83985	-7.41406	3.83467e-10	2.9764e-09	12.632
CHAD	-3.13625	5.0987	-8.25879	1.2828e-11	1.38318e-10	16.0017
GHR	-3.12932	6.7138	-11.6303	2.59239e-17	1.07007e-15	29.0415
PDK4	-3.12107	10.1165	-11.3147	8.42231e-17	2.97208e-15	27.8692
MFAP5	-3.10369	8.28653	-8.56084	3.82166e-12	4.60979e-11	17.2043
C1QTNF7	-3.10224	5.76411	-10.5157	1.75279e-15	4.39912e-14	24.8489
MYOCD	-3.08845	7.20044	-8.42405	6.61032e-12	7.59853e-11	16.6601
TSPAN7	-3.08006	9.70785	-12.7773	3.96656e-19	2.75113e-17	33.1983
CIDEC	-3.07757	5.75812	-7.63115	1.60091e-10	1.35813e-09	13.4976
FLJ32063	-3.07514	7.1324	-5.73813	2.96452e-07	1.31821e-06	6.06948
FOXP2	-3.06646	6.02441	-7.14303	1.13962e-09	8.07048e-09	11.5535
SEMA3D	-3.06489	5.37505	-9.59235	6.35851e-14	1.11668e-12	21.2762
KRT20	-3.06281	13.2127	-8.01988	3.35039e-11	3.30372e-10	15.0488
JPH2	-3.05604	7.50796	-7.12518	1.22424e-09	8.60444e-09	11.4827
THRB	-3.05335	7.95303	-8.34675	9.01264e-12	1.0056e-10	16.3522
DPF3	-3.05002	5.35675	-15.5908	2.84052e-23	7.88053e-21	42.6707
GCNT3	-3.04117	11.1545	-7.62963	1.61078e-10	1.36537e-09	13.4915
BMP5	-3.04042	5.21103	-9.22405	2.72137e-13	4.14463e-12	19.8303
MYLK	-3.03896	12.2934	-7.97185	4.06418e-11	3.92648e-10	14.8572
MUSTN1	-3.02782	5.08439	-11.2759	9.74446e-17	3.34538e-15	27.7241
GPM6B	-3.02454	6.50162	-9.5073	8.88694e-14	1.5066e-12	20.9432
NEGR1	-3.01887	7.5467	-10.0614	1.01505e-14	2.12991e-13	23.1014
MAB21L2	-3.01143	8.58661	-6.718	6.24879e-09	3.82036e-08	9.87102
B3GALT5	-3.00715	7.84567	-7.74607	1.00812e-10	8.98299e-10	13.9561
LGI4	-3.00438	6.86142	-11.0339	2.42729e-16	7.66694e-15	26.8161
RNF150	-2.99676	5.24066	-7.10691	1.31736e-09	9.1835e-09	11.4101
CLDN23	-2.99496	9.27639	-11.6729	2.21284e-17	9.32845e-16	29.199
SRPX	-2.99082	7.83155	-10.9303	3.59537e-16	1.08072e-14	26.4251
CALB2	-2.98423	6.31243	-7.22272	8.27503e-10	5.99891e-09	11.8703
NEU4	-2.98304	7.89395	-7.79485	8.28444e-11	7.52565e-10	14.1508
SULT1B1	-2.95217	8.25514	-11.4374	5.32057e-17	2.01162e-15	28.3262
C15orf48	-2.95175	11.9739	-9.04741	5.48557e-13	7.83708e-12	19.1334
IGSF10	-2.94976	5.73567	-7.19164	9.37535e-10	6.72757e-09	11.7467
UCHL1	-2.94496	6.97424	-8.14786	2.00295e-11	2.0674e-10	15.5594
SEMA6A	-2.94477	9.52735	-11.033	2.43578e-16	7.68149e-15	26.8126
SCIN	-2.94058	8.75665	-8.64129	2.76989e-12	3.41947e-11	17.5241
NAALADL1	-2.93752	7.12267	-10.7723	6.56156e-16	1.84029e-14	25.8266
NPY1R	-2.92841	5.43939	-8.07651	2.66815e-11	2.69838e-10	15.2748
CORO2B	-2.92109	5.18319	-9.71855	3.87372e-14	7.16464e-13	21.7691
HBA2	-2.9076	8.66271	-7.98985	3.78043e-11	3.68529e-10	14.929
HLF	-2.90331	6.26827	-8.58457	3.47535e-12	4.22547e-11	17.2987
GPER	-2.90155	6.39466	-9.71465	3.93343e-14	7.25546e-13	21.7539
CD79A	-2.89375	7.92538	-6.17853	5.30879e-08	2.73568e-07	7.76064
CPM	-2.89174	9.38321	-12.8544	3.01284e-19	2.1703e-17	33.4717
LGALS9B	-2.88693	5.97253	-7.37007	4.57677e-10	3.5047e-09	12.4567
HSPB7	-2.88461	7.42981	-5.77397	2.58027e-07	1.16322e-06	6.20577
FAM129A	-2.87838	9.47664	-8.83926	1.25637e-12	1.66947e-11	18.3097
P2RY1	-2.87752	6.80307	-13.0398	1.56013e-19	1.2319e-17	34.1258
RICH2	-2.87288	9.10201	-11.5158	3.9703e-17	1.54375e-15	28.6174
PDE2A	-2.87278	7.18197	-10.0624	1.01123e-14	2.12492e-13	23.1052
NR3C2	-2.87055	9.6898	-12.6474	6.31549e-19	4.18248e-17	32.7359
L1CAM	-2.87039	7.89533	-5.96716	1.2164e-07	5.83882e-07	6.94472
SDPR	-2.85909	8.67774	-10.1723	6.59996e-15	1.45383e-13	23.5297
SLC38A4	-2.85842	5.95049	-6.1329	6.35261e-08	3.2306e-07	7.58389
PTN	-2.84586	6.84304	-10.9924	2.84052e-16	8.7693e-15	26.6596
TMEM37	-2.84077	9.09898	-10.5473	1.55219e-15	3.95857e-14	24.9698
KIAA1644	-2.83893	6.70742	-7.19699	9.17592e-10	6.60203e-09	11.768
SNCG	-2.83682	5.84725	-10.5611	1.47182e-15	3.77922e-14	25.0227
SHISA3	-2.83468	5.6861	-7.0818	1.45704e-09	1.0064e-08	11.3104
PEG3	-2.82928	5.86315	-8.92509	8.92434e-13	1.22308e-11	18.6496
PGR	-2.82238	5.32731	-8.77979	1.59282e-12	2.07405e-11	18.0739
EPB41L3	-2.82129	9.30282	-11.4497	5.08159e-17	1.92481e-15	28.3719
TTLL6	-2.82126	5.986	-8.89465	1.00746e-12	1.36343e-11	18.5291
CHL1	-2.81518	7.05701	-10.4461	2.29066e-15	5.59183e-14	24.5826
PRELP	-2.81455	9.23942	-7.1048	1.3286e-09	9.24932e-09	11.4017
C14orf176	-2.81195	7.69182	-11.6113	2.7824e-17	1.1305e-15	28.9711
ADAM6	-2.80816	15.5587	-6.15177	5.8982e-08	3.01594e-07	7.65696
RBM24	-2.80275	5.3224	-8.66286	2.54098e-12	3.16735e-11	17.6098
F13A1	-2.79461	9.19277	-8.1294	2.15718e-11	2.21656e-10	15.4858
NKX2-3	-2.79218	7.39331	-11.6781	2.17066e-17	9.20173e-16	29.2181
TMEM220	-2.78847	6.80775	-11.537	3.66883e-17	1.45689e-15	28.696
PDE3A	-2.788	8.27197	-8.27664	1.19408e-11	1.29638e-10	16.0729
ISX	-2.77899	9.33654	-6.31263	3.12778e-08	1.67834e-07	8.28185
CCL28	-2.77328	8.05459	-9.09275	4.58127e-13	6.68848e-12	19.3125
TRIM40	-2.77265	5.7597	-7.61181	1.73051e-10	1.45306e-09	13.4204
LGALS9C	-2.77207	8.29248	-9.27678	2.20856e-13	3.43238e-12	20.0379
NTN1	-2.77008	7.84753	-10.853	4.82366e-16	1.39675e-14	26.1327
AGPAT9	-2.76957	8.10537	-13.5816	2.33776e-20	2.48675e-18	36.0117
MYL9	-2.76389	12.8982	-6.38571	2.34239e-08	1.28272e-07	8.5669
DHRS11	-2.76101	10.115	-14.7466	4.48175e-22	7.73196e-20	39.9366
SEPP1	-2.75556	13.3417	-10.4145	2.58724e-15	6.24895e-14	24.4614
FAM132A	-2.75217	5.17586	-8.44881	5.98569e-12	6.93097e-11	16.7587
SECTM1	-2.74655	9.75754	-10.0017	1.28102e-14	2.6273e-13	22.8699
XDH	-2.74096	9.31044	-9.42656	1.22186e-13	2.00517e-12	20.6266
CXCL12	-2.72997	10.2078	-10.2955	4.09477e-15	9.45621e-14	24.0046
TUBAL3	-2.72629	7.52494	-8.02912	3.22818e-11	3.19395e-10	15.0857
REP15	-2.72413	7.6089	-6.51021	1.42939e-08	8.15603e-08	9.0541
LILRB5	-2.72149	6.83943	-8.52557	4.40124e-12	5.23811e-11	17.0641
NECAB1	-2.71976	5.27953	-7.66864	1.37676e-10	1.1866e-09	13.6471
FRMD3	-2.71821	6.04764	-9.08466	4.73083e-13	6.87846e-12	19.2805
PDE9A	-2.71217	9.58101	-10.7237	7.89656e-16	2.14724e-14	25.6423
SLC16A9	-2.70967	8.40307	-7.79311	8.34258e-11	7.57176e-10	14.1438
CCL13	-2.70221	6.04976	-6.51244	1.41681e-08	8.08874e-08	9.06283
POPDC2	-2.70098	6.38608	-5.51206	7.07791e-07	2.94686e-06	5.21604
S100B	-2.70056	6.55227	-8.26316	1.26052e-11	1.36274e-10	16.0191
MST1P9	-2.69694	5.81238	-7.09943	1.35754e-09	9.42518e-09	11.3804
SCUBE2	-2.69658	7.19197	-8.06513	2.79309e-11	2.80676e-10	15.2294
CCDC69	-2.69343	9.86802	-9.77292	3.1302e-14	5.90111e-13	21.9811
MPZ	-2.69252	5.90361	-9.34511	1.6855e-13	2.69286e-12	20.3067
IL6R	-2.69088	8.36653	-13.1299	1.13474e-19	9.31844e-18	34.4422
ADAM33	-2.69024	6.64858	-7.72846	1.08218e-10	9.54752e-10	13.8858
SLC22A18AS	-2.68975	7.70047	-10.7467	7.23283e-16	1.99048e-14	25.7296
NBEA	-2.68885	6.23023	-7.54431	2.2706e-10	1.84908e-09	13.1512
HOXD1	-2.68512	5.50255	-11.0066	2.69161e-16	8.38524e-15	26.7132
ENTPD8	-2.68426	9.0845	-7.20266	8.96937e-10	6.46109e-09	11.7906
JAM2	-2.67924	6.73203	-9.45409	1.09611e-13	1.82064e-12	20.7346
LOC401093	-2.67783	7.38281	-8.7378	1.88353e-12	2.41529e-11	17.9073
IL1R2	-2.67089	8.24338	-7.91255	5.15921e-11	4.89005e-10	14.6205
NR5A2	-2.6679	8.43555	-11.8127	1.31896e-17	6.08501e-16	29.7137
CKB	-2.66302	13.4104	-9.62631	5.564e-14	9.92432e-13	21.4089
RNF152	-2.65868	5.22668	-13.5429	2.67383e-20	2.77241e-18	35.8783
EEF1A2	-2.65762	5.07664	-7.1412	1.14802e-09	8.12158e-09	11.5463
LRMP	-2.65681	6.76555	-8.36049	8.52908e-12	9.57365e-11	16.407
DARC	-2.65679	7.978	-8.32714	9.75022e-12	1.08084e-10	16.2741
FGL2	-2.6522	9.93796	-12.1984	3.20465e-18	1.74977e-16	31.1209
CDKN2B	-2.64613	9.70531	-11.0586	2.21123e-16	7.04915e-15	26.9088
IGFBP6	-2.64176	8.14796	-11.5464	3.54248e-17	1.41492e-15	28.7309
MAOB	-2.63757	7.90043	-7.48484	2.88451e-10	2.29442e-09	12.9141
METTL7A	-2.63249	10.8575	-12.4619	1.23154e-18	7.48035e-17	32.0719
RUNDC3B	-2.63029	5.84541	-11.2002	1.2954e-16	4.36691e-15	27.4409
ITM2C	-2.62668	14.0598	-12.9719	1.98465e-19	1.52602e-17	33.8866
MAPT	-2.62477	5.49565	-6.66575	7.69672e-09	4.61893e-08	9.66518
PTGS1	-2.62267	9.6748	-9.30484	1.97647e-13	3.09275e-12	20.1483
GNG7	-2.61557	6.93858	-15.5833	2.90977e-23	7.965e-21	42.6469
PHGR1	-2.61199	11.6785	-9.86684	2.16772e-14	4.21831e-13	22.3466
REEP2	-2.60605	5.62171	-7.73805	1.04121e-10	9.23373e-10	13.9241
LTK	-2.6058	6.6641	-5.64126	4.30944e-07	1.8618e-06	5.70241
FAM46B	-2.60393	5.81572	-6.67574	7.3962e-09	4.45682e-08	9.70451
GPX3	-2.60216	10.2877	-9.10268	4.40422e-13	6.44926e-12	19.3516
DEFB1	-2.60121	6.02843	-6.62367	9.10188e-09	5.38196e-08	9.4996
LYNX1	-2.60009	6.69911	-8.60971	3.14278e-12	3.84283e-11	17.3986
AHCYL2	-2.59216	11.8544	-11.7838	1.46803e-17	6.62386e-16	29.6072
SLIT3	-2.5915	8.68829	-8.20935	1.56454e-11	1.65142e-10	15.8046
AMN	-2.5879	9.42258	-7.95917	4.27699e-11	4.10888e-10	14.8066
CLU	-2.58585	11.2768	-8.74675	1.81736e-12	2.34215e-11	17.9428
LPAR1	-2.58554	8.12145	-12.8989	2.57173e-19	1.90605e-17	33.629
CCL21	-2.58468	9.15822	-7.14576	1.12715e-09	7.98772e-09	11.5644
SLC2A4	-2.58381	6.98633	-6.93215	2.65445e-09	1.73886e-08	10.7171
ADAMTSL1	-2.58296	6.97641	-10.2187	5.51206e-15	1.23946e-13	23.7089
SDCBP2	-2.58097	10.7258	-10.0067	1.25628e-14	2.58172e-13	22.8893
ST6GALNAC6	-2.57369	10.8548	-10.1691	6.68234e-15	1.46726e-13	23.5174
LPHN3	-2.57263	5.85086	-10.2934	4.12872e-15	9.52389e-14	23.9964
KIAA0125	-2.5725	5.42523	-6.04939	8.81695e-08	4.35125e-07	7.26126
P2RY14	-2.56888	6.77905	-11.7444	1.69811e-17	7.48114e-16	29.4624
HRCT1	-2.56634	7.64762	-9.57809	6.72551e-14	1.17012e-12	21.2204
MEP1A	-2.5661	11.4525	-7.58381	1.93691e-10	1.60731e-09	13.3087
KCNG1	-2.56501	5.02267	-7.70533	1.18773e-10	1.03939e-09	13.7935
PPP1R14A	-2.56372	7.14099	-8.66724	2.49687e-12	3.12185e-11	17.6272
KCNIP4	-2.56356	5.35939	-9.58379	6.5762e-14	1.15e-12	21.2427
CD36	-2.56032	8.63385	-9.58289	6.59966e-14	1.15217e-12	21.2391
MGC29506	-2.5603	8.28669	-5.72633	3.10298e-07	1.37264e-06	6.02467
CLDN11	-2.55883	5.61351	-7.68438	1.29221e-10	1.12268e-09	13.7099
CHRNA3	-2.55533	6.10448	-7.46156	3.16771e-10	2.50031e-09	12.8213
KIF5C	-2.55473	5.80169	-8.34248	9.1682e-12	1.0224e-10	16.3352
ZBTB7C	-2.55372	9.22277	-7.74817	9.99653e-11	8.91137e-10	13.9645
FXYD6	-2.54623	9.26398	-7.30496	5.94621e-10	4.43912e-09	12.1975
PPP1R12B	-2.54466	11.2481	-7.99364	3.72331e-11	3.63133e-10	14.9441
MAPK10	-2.54237	5.55404	-10.4025	2.70995e-15	6.51467e-14	24.4153
SULT1A1	-2.54091	9.48706	-10.0787	9.49289e-15	2.0154e-13	23.1681
SLC9A2	-2.53393	9.54371	-9.38385	1.44626e-13	2.3361e-12	20.4589
CRYAB	-2.53381	8.47383	-7.28386	6.47259e-10	4.792e-09	12.1135
PRKCB	-2.53096	7.77794	-8.70547	2.14312e-12	2.71512e-11	17.779
BVES	-2.52969	6.26747	-6.71744	6.26284e-09	3.82781e-08	9.8688
FAM70A	-2.52871	5.18329	-8.20849	1.56996e-11	1.65629e-10	15.8012
BCAS1	-2.52761	10.6148	-9.17526	3.30202e-13	4.941e-12	19.638
GGT6	-2.52725	10.5682	-6.25913	3.86387e-08	2.04026e-07	8.07358
SCG2	-2.52709	7.15595	-9.15247	3.61439e-13	5.37706e-12	19.5481
LAMA1	-2.52426	6.64509	-7.64656	1.50468e-10	1.28445e-09	13.559
FLNC	-2.52323	10.8722	-5.73523	2.99796e-07	1.33019e-06	6.05847
CA12	-2.50945	11.9551	-8.45138	5.92443e-12	6.86778e-11	16.7689
KIT	-2.50354	7.87836	-10.238	5.11555e-15	1.15536e-13	23.7832
RGMA	-2.49974	8.19043	-7.39576	4.12757e-10	3.18209e-09	12.5591
WDR78	-2.49662	6.52546	-9.72464	3.7822e-14	7.00799e-13	21.7929
CD163L1	-2.49086	7.89273	-8.17272	1.81256e-11	1.88605e-10	15.6585
REEP1	-2.49066	7.03953	-5.58686	5.31274e-07	2.25819e-06	5.49718
TSPAN1	-2.48855	13.4389	-9.89299	1.95719e-14	3.85986e-13	22.4482
TP53INP2	-2.48723	10.7781	-13.4931	3.17976e-20	3.1637e-18	35.7062
CES3	-2.48715	10.1982	-9.51289	8.69324e-14	1.47864e-12	20.9651
LOC339524	-2.48437	5.07138	-10.2589	4.71784e-15	1.07262e-13	23.8637
SELENBP1	-2.48354	12.929	-10.7693	6.63689e-16	1.85634e-14	25.8152
RHBDL2	-2.48317	7.93366	-7.10945	1.30401e-09	9.09974e-09	11.4202
HAPLN1	-2.47977	6.77087	-9.18147	3.22168e-13	4.83841e-12	19.6625
BARX2	-2.4739	7.12457	-5.83568	2.03064e-07	9.34943e-07	6.44103
GDPD3	-2.47371	8.13529	-9.42583	1.22536e-13	2.00931e-12	20.6237
GLDN	-2.4725	6.13406	-6.09868	7.2667e-08	3.65113e-07	7.45155
FOXF2	-2.46477	7.69944	-8.7235	1.99425e-12	2.5414e-11	17.8505
DMD	-2.45738	8.45842	-6.5709	1.12294e-08	6.5364e-08	9.29224
CAPN13	-2.45672	7.47148	-6.40314	2.18609e-08	1.20614e-07	8.635
SMPDL3A	-2.45434	9.63319	-12.8471	3.09314e-19	2.21262e-17	33.4455
C1orf115	-2.45011	9.80953	-11.4828	4.49048e-17	1.7264e-15	28.4949
P2RX1	-2.45008	6.16323	-9.68807	4.36575e-14	7.96757e-13	21.6502
RERG	-2.44936	6.80635	-6.95816	2.39186e-09	1.58046e-08	10.8201
GGTA1	-2.44917	6.58053	-9.9645	1.48061e-14	2.98888e-13	22.7258
KLF4	-2.4457	11.6536	-10.1063	8.52639e-15	1.83103e-13	23.2749
CDHR2	-2.44141	9.86949	-6.26281	3.80812e-08	2.01445e-07	8.0879
RDH5	-2.43477	7.61686	-12.3208	2.05252e-18	1.17377e-16	31.564
ADH6	-2.42821	7.29161	-8.07148	2.72263e-11	2.74401e-10	15.2547
CLDN5	-2.42783	7.97015	-10.1202	8.07767e-15	1.74013e-13	23.3287
AOX1	-2.42661	6.48805	-6.48768	1.56322e-08	8.85076e-08	8.9658
LIMS2	-2.42462	9.30785	-7.01025	1.94123e-09	1.30967e-08	11.0266
ATP1B2	-2.4219	5.11373	-9.75812	3.3171e-14	6.23057e-13	21.9234
PPARGC1A	-2.41642	8.4445	-8.2438	1.36241e-11	1.45843e-10	15.942
MFSD4	-2.40998	8.77271	-7.41058	3.8887e-10	3.0172e-09	12.6181
DACT3	-2.40735	7.2495	-7.04621	1.68064e-09	1.14897e-08	11.1692
ARL14	-2.40721	8.26725	-9.46381	1.05487e-13	1.75783e-12	20.7727
AQP7	-2.40564	5.72476	-7.99761	3.66427e-11	3.58397e-10	14.96
MRGPRF	-2.39855	8.53542	-6.77397	4.99749e-09	3.11187e-08	10.0918
FOLR2	-2.39816	7.89896	-7.67459	1.34418e-10	1.16167e-09	13.6708
CNTN4	-2.39765	6.51895	-10.8544	4.79799e-16	1.3929e-14	26.138
GPR44	-2.3964	5.93562	-9.72731	3.74293e-14	6.94777e-13	21.8033
ARHGAP20	-2.38813	5.46245	-9.64484	5.17323e-14	9.30819e-13	21.4814
MT1X	-2.38757	9.37485	-9.8731	2.1153e-14	4.14381e-13	22.371
FGFR2	-2.38729	9.1914	-7.34721	5.01728e-10	3.80934e-09	12.3657
TNS1	-2.38298	11.8091	-6.25915	3.86346e-08	2.04026e-07	8.07368
HSD11B2	-2.37555	12.104	-11.664	2.28774e-17	9.56565e-16	29.1659
ENTPD5	-2.37543	9.64482	-11.7643	1.57749e-17	6.99478e-16	29.5356
SLC9A9	-2.36998	6.71002	-11.0779	2.055e-16	6.60237e-15	26.9817
FAM95B1	-2.36919	5.13516	-8.00109	3.61339e-11	3.54602e-10	14.9738
TRHDE	-2.36713	5.45785	-8.20644	1.58291e-11	1.66909e-10	15.793
AOC3	-2.36629	10.1934	-6.75452	5.40106e-09	3.33886e-08	10.015
PRKACB	-2.36535	10.7538	-12.5228	9.88548e-19	6.22543e-17	32.2905
MT2A	-2.36235	10.8485	-10.2456	4.96812e-15	1.12702e-13	23.8123
SYNGR1	-2.3597	6.80637	-7.5207	2.49693e-10	2.01501e-09	13.057
SGK2	-2.3545	8.78054	-6.6724	7.49525e-09	4.51386e-08	9.69138
GPR128	-2.35017	6.80099	-5.81267	2.22051e-07	1.01553e-06	6.35323
CDHR5	-2.34988	11.8606	-10.6734	9.57266e-16	2.56856e-14	25.4508
PRKAR2B	-2.34962	7.98824	-10.7824	6.31316e-16	1.79018e-14	25.865
SPINK5	-2.33427	6.89502	-6.61928	9.26234e-09	5.46896e-08	9.48235
CCDC152	-2.33256	6.5307	-9.80283	2.78436e-14	5.31253e-13	22.0976
ACADS	-2.33202	10.6594	-12.9944	1.83241e-19	1.41426e-17	33.9659
PDE7B	-2.32859	5.80531	-10.7769	6.44641e-16	1.81543e-14	25.8442
GABRA2	-2.32786	5.06156	-6.78114	4.85619e-09	3.03032e-08	10.1201
ADCY2	-2.32173	5.00813	-6.35073	2.69029e-08	1.45807e-07	8.43037
IRF4	-2.32119	7.17877	-6.61332	9.48471e-09	5.58901e-08	9.45893
CASP5	-2.32081	7.11578	-6.62135	9.18644e-09	5.42727e-08	9.49047
MFAP4	-2.31926	10.7539	-7.81627	7.60026e-11	6.96889e-10	14.2362
TMEM61	-2.30323	5.44918	-6.93481	2.62638e-09	1.72179e-08	10.7276
LRCH2	-2.29585	5.53626	-7.17221	1.0136e-09	7.24302e-09	11.6695
CCDC68	-2.29479	8.57858	-11.1823	1.38602e-16	4.62682e-15	27.3736
PBLD	-2.29333	9.29795	-10.0976	8.81922e-15	1.88603e-13	23.2413
SLIT2	-2.29105	6.63634	-6.03182	9.44508e-08	4.64115e-07	7.19355
LOC728264	-2.28857	8.39616	-5.96841	1.21046e-07	5.81442e-07	6.94952
NACAD	-2.28491	5.69207	-7.78253	8.7055e-11	7.8733e-10	14.1016
TMEM171	-2.28467	9.03344	-9.72606	3.76123e-14	6.97543e-13	21.7984
PLCE1	-2.28281	9.62711	-12.4345	1.36002e-18	8.16412e-17	31.9733
LEPREL1	-2.28028	8.32699	-8.19856	1.63386e-11	1.71488e-10	15.7616
SCN4B	-2.27966	6.30292	-10.1463	7.29965e-15	1.59428e-13	23.4294
MS4A8B	-2.2782	7.18909	-5.61926	4.69036e-07	2.01324e-06	5.61934
FLJ40330	-2.27436	5.23656	-5.82889	2.08495e-07	9.57585e-07	6.4151
KLRB1	-2.2703	6.02494	-8.36459	8.39023e-12	9.43843e-11	16.4233
SOSTDC1	-2.2699	7.17272	-5.73526	2.99769e-07	1.33019e-06	6.05856
CCBP2	-2.26917	5.01683	-9.94946	1.57001e-14	3.15693e-13	22.6675
COL28A1	-2.26789	5.30673	-6.00418	1.05245e-07	5.12374e-07	7.08709
PLCL2	-2.26516	7.99337	-9.16201	3.48027e-13	5.18881e-12	19.5857
C7orf58	-2.26172	8.45808	-7.05466	1.62458e-09	1.11324e-08	11.2027
PDLIM3	-2.26087	9.5393	-6.70943	6.46603e-09	3.94027e-08	9.83726
CFL2	-2.25903	8.96375	-6.94786	2.4926e-09	1.64174e-08	10.7793
PROM2	-2.255	9.12147	-6.53517	1.29439e-08	7.45411e-08	9.152
TCF21	-2.25368	8.08887	-9.55402	7.39358e-14	1.27771e-12	21.1262
ITGA8	-2.2441	5.64885	-9.07399	4.93577e-13	7.12683e-12	19.2384
MAP6	-2.24349	5.48038	-7.00273	2.00065e-09	1.3449e-08	10.9968
SALL2	-2.2427	6.12465	-7.35076	4.94622e-10	3.76261e-09	12.3799
TINAG	-2.23431	7.29539	-6.02557	9.67908e-08	4.74252e-07	7.16947
SYP	-2.23213	6.57752	-11.7106	1.92429e-17	8.29952e-16	29.338
CAND2	-2.23129	5.53244	-8.78452	1.56299e-12	2.04123e-11	18.0927
EDIL3	-2.23002	8.67583	-10.345	3.38189e-15	7.96217e-14	24.1949
PALM	-2.22814	7.72869	-7.82086	7.46097e-11	6.85034e-10	14.2546
NGFR	-2.22769	6.44183	-6.39852	2.22646e-08	1.22545e-07	8.61696
MSRB3	-2.22684	9.51329	-6.15002	5.93906e-08	3.03532e-07	7.65017
CYS1	-2.22602	6.39928	-7.87183	6.07753e-11	5.67144e-10	14.458
VAT1L	-2.22465	6.41244	-10.8244	5.37891e-16	1.54015e-14	26.0243
PPP2R3A	-2.22415	8.13199	-14.9016	2.68283e-22	5.00714e-20	40.4454
UBE2QL1	-2.2208	5.18052	-7.40105	4.04065e-10	3.12564e-09	12.5801
GALNTL2	-2.22052	6.41347	-6.99906	2.03027e-09	1.36258e-08	10.9822
CCR2	-2.21879	6.00639	-7.22365	8.24405e-10	5.98347e-09	11.874
RET	-2.21835	5.75613	-6.36033	2.58996e-08	1.40862e-07	8.46784
GEFT	-2.21778	8.05004	-6.36333	2.55941e-08	1.39376e-07	8.47954
CCL8	-2.2152	5.65941	-5.57318	5.59946e-07	2.36976e-06	5.44565
FAM46C	-2.21466	9.59582	-7.90306	5.36003e-11	5.06403e-10	14.5826
AKR1C2	-2.21163	6.96842	-8.23786	1.39528e-11	1.49116e-10	15.9183
ZNF415	-2.21018	6.05355	-7.22024	8.35798e-10	6.04827e-09	11.8604
GLIPR2	-2.20611	9.48489	-11.1506	1.56162e-16	5.16265e-15	27.2549
ZNF471	-2.19812	5.22152	-7.75759	9.62466e-11	8.60978e-10	14.002
GPAT2	-2.19742	5.16952	-6.95918	2.38206e-09	1.575e-08	10.8242
CES1	-2.19676	8.33204	-5.71704	3.21657e-07	1.41983e-06	5.98939
TMOD1	-2.19547	7.53271	-8.30494	1.06586e-11	1.16892e-10	16.1857
DTNA	-2.18974	6.83098	-5.47808	8.06028e-07	3.31751e-06	5.08873
FAM55B	-2.18803	5.9016	-5.88837	1.65415e-07	7.74452e-07	6.64252
SPARCL1	-2.18593	11.6049	-7.61002	1.74301e-10	1.46236e-09	13.4133
CES2	-2.18535	12.7838	-9.53641	7.92424e-14	1.36188e-12	21.0572
ARL4D	-2.17904	6.59343	-7.19146	9.3821e-10	6.73007e-09	11.746
ITM2A	-2.17781	8.29876	-8.45752	5.7804e-12	6.716e-11	16.7933
SGK1	-2.17732	10.5168	-7.30272	5.99999e-10	4.47438e-09	12.1886
VIPR2	-2.17318	5.15485	-5.6887	3.5888e-07	1.57163e-06	5.88193
TCEAL7	-2.1704	5.69399	-7.34518	5.05851e-10	3.8364e-09	12.3576
MGP	-2.1661	10.6994	-6.0737	8.01506e-08	4.00266e-07	7.35508
SNCA	-2.16591	5.61279	-6.76676	5.14331e-09	3.19589e-08	10.0634
OLFM1	-2.16553	7.35641	-8.74455	1.83339e-12	2.35836e-11	17.9341
EML1	-2.1612	8.21713	-6.56537	1.14792e-08	6.67047e-08	9.27053
LRRN4CL	-2.15841	6.5259	-8.06298	2.81731e-11	2.82833e-10	15.2208
PPYR1	-2.15782	5.96871	-7.50717	2.6366e-10	2.11691e-09	13.0031
BEX4	-2.15669	8.0795	-9.35039	1.65065e-13	2.6413e-12	20.3274
HDAC9	-2.15536	6.90821	-8.78839	1.53904e-12	2.01894e-11	18.108
FILIP1	-2.15143	6.16382	-6.28714	3.45932e-08	1.84275e-07	8.18256
C7orf10	-2.14836	5.75866	-7.95956	4.27018e-11	4.10617e-10	14.8081
PAQR5	-2.14265	9.12376	-7.97309	4.04403e-11	3.91438e-10	14.8621
CAP2	-2.14219	7.21173	-5.71074	3.29588e-07	1.4514e-06	5.96548
SYNC	-2.14042	7.24451	-7.67454	1.34444e-10	1.16167e-09	13.6707
CFP	-2.14034	5.88607	-8.35136	8.84744e-12	9.88241e-11	16.3706
KIAA1683	-2.13844	5.86972	-7.75996	9.53311e-11	8.53531e-10	14.0115
RGS2	-2.13402	9.45738	-7.92477	4.91161e-11	4.67479e-10	14.6693
PLCD1	-2.13368	9.30644	-13.1896	9.19806e-20	7.7076e-18	34.6509
DNAJB5	-2.13339	7.61796	-6.42936	1.97028e-08	1.09739e-07	8.73751
MALL	-2.13138	11.8228	-9.98414	1.37149e-14	2.7961e-13	22.802
ROR1	-2.12571	5.38478	-8.32882	9.68495e-12	1.07419e-10	16.2808
TUB	-2.12048	5.82745	-6.90744	2.93056e-09	1.90334e-08	10.6193
CPNE8	-2.11658	7.74388	-10.4461	2.2903e-15	5.59183e-14	24.5827
GPA33	-2.11633	12.7382	-8.70117	2.18024e-12	2.7511e-11	17.7619
FMO5	-2.11114	8.90989	-9.22946	2.6637e-13	4.06888e-12	19.8516
CLIP4	-2.1095	7.16936	-7.42084	3.73145e-10	2.90727e-09	12.659
MEIS1	-2.10935	7.77744	-6.65439	8.05326e-09	4.8118e-08	9.62047
DISP2	-2.10749	7.08698	-7.82604	7.3072e-11	6.71817e-10	14.2752
ASAM	-2.10727	7.30822	-6.38943	2.30815e-08	1.26701e-07	8.58143
PER3	-2.10524	8.09697	-7.96764	4.13359e-11	3.9879e-10	14.8404
MPP2	-2.1004	5.51778	-6.95014	2.46998e-09	1.62737e-08	10.7884
CACNB2	-2.10004	6.5549	-9.83476	2.45729e-14	4.73693e-13	22.2219
DCN	-2.09981	12.7247	-7.25957	7.13631e-10	5.24368e-09	12.0169
MAOA	-2.09743	12.039	-9.4833	9.76857e-14	1.6425e-12	20.8491
PTPRH	-2.09448	10.3933	-9.91662	1.78468e-14	3.54346e-13	22.54
TMCC3	-2.09271	9.72779	-11.1391	1.63135e-16	5.36726e-15	27.2114
TCEA3	-2.09234	10.2766	-6.06965	8.1435e-08	4.05989e-07	7.33944
KLHL13	-2.09158	6.48937	-6.88788	3.16912e-09	2.04212e-08	10.5419
LY9	-2.08949	5.4221	-7.00775	1.96084e-09	1.32074e-08	11.0166
RASD2	-2.08902	8.17654	-8.01966	3.35334e-11	3.30504e-10	15.048
CD209	-2.08882	7.92232	-7.98375	3.87427e-11	3.76604e-10	14.9047
WBSCR17	-2.0859	5.19431	-5.57437	5.57403e-07	2.35997e-06	5.45011
KANK4	-2.08491	5.15745	-7.37801	4.43293e-10	3.4009e-09	12.4884
PID1	-2.08388	9.1696	-8.96445	7.62995e-13	1.05911e-11	18.8054
RTN1	-2.08115	6.39623	-7.54596	2.25562e-10	1.83834e-09	13.1578
ST8SIA1	-2.07729	5.5211	-7.65675	1.4442e-10	1.24056e-09	13.5997
CCDC80	-2.07493	10.2971	-6.36148	2.57822e-08	1.40289e-07	8.47232
C14orf132	-2.07288	7.6346	-7.38831	4.25301e-10	3.27511e-09	12.5294
APLP1	-2.07198	5.07633	-8.27648	1.19487e-11	1.29655e-10	16.0722
AKR1C1	-2.06821	7.25389	-8.20549	1.58897e-11	1.67461e-10	15.7892
CPNE5	-2.06248	7.33301	-8.56439	3.76774e-12	4.5501e-11	17.2185
RASGRP2	-2.06057	6.38603	-7.02853	1.80404e-09	1.22598e-08	11.0991
ALDH1A1	-2.05962	10.6818	-6.18529	5.16937e-08	2.67121e-07	7.78685
PIGZ	-2.05792	9.52938	-7.6839	1.29471e-10	1.12422e-09	13.708
NAP1L3	-2.0575	5.3633	-6.82006	4.15681e-09	2.62663e-08	10.2738
ADRA2A	-2.05511	8.16218	-6.1661	5.57483e-08	2.86558e-07	7.71248
KL	-2.05395	5.32305	-7.60581	1.7728e-10	1.48585e-09	13.3965
ZNF575	-2.05356	6.46927	-11.7942	1.41241e-17	6.43243e-16	29.6456
SERTAD4	-2.05242	5.48719	-6.97367	2.24779e-09	1.48958e-08	10.8816
SLC22A17	-2.04821	7.22972	-7.94905	4.45457e-11	4.2655e-10	14.7662
SSBP2	-2.04727	7.1183	-9.26344	2.32827e-13	3.60478e-12	19.9854
SORBS2	-2.04664	9.46991	-6.88604	3.19256e-09	2.05594e-08	10.5346
SCARA3	-2.04537	7.94102	-7.77452	8.99057e-11	8.08482e-10	14.0696
RAB6B	-2.04177	6.84897	-8.94689	8.18237e-13	1.12892e-11	18.7359
UGP2	-2.04158	11.8731	-20.1554	4.00701e-29	6.85533e-26	55.9554
FAM82A1	-2.03823	7.39811	-12.8734	2.81625e-19	2.05757e-17	33.5388
COLEC12	-2.03704	7.63576	-7.77809	8.86222e-11	7.98559e-10	14.0839
CD27	-2.03435	7.13911	-6.91714	2.81891e-09	1.83605e-08	10.6577
PHYHD1	-2.03433	5.47192	-6.49606	1.51206e-08	8.57531e-08	8.99863
SCUBE1	-2.03306	5.99803	-7.69339	1.24623e-10	1.08642e-09	13.7459
MEIS3P1	-2.03071	7.54475	-10.0175	1.20418e-14	2.48711e-13	22.9314
LANCL3	-2.02814	5.00601	-7.8522	6.57706e-11	6.08778e-10	14.3797
SPON1	-2.02613	10.1406	-5.53175	6.56399e-07	2.74625e-06	5.28989
DDR2	-2.022	7.52322	-5.67254	3.81979e-07	1.66568e-06	5.82073
ACACB	-2.02137	9.26708	-9.489	9.55139e-14	1.60861e-12	20.8715
LGALS4	-2.02093	14.9892	-12.8124	3.5004e-19	2.45267e-17	33.3226
RSPO3	-2.01979	6.53999	-6.51476	1.40381e-08	8.02122e-08	9.07192
NDN	-2.01963	8.3033	-9.25229	2.43338e-13	3.75054e-12	19.9415
FLVCR2	-2.01808	7.77628	-8.06735	2.76821e-11	2.78448e-10	15.2382
CAV1	-2.01638	10.6491	-7.59432	1.85673e-10	1.5464e-09	13.3506
SH3BGR	-2.01462	5.82301	-7.00382	1.99194e-09	1.33949e-08	11.0011
NLGN4X	-2.01405	5.62014	-8.086	2.56825e-11	2.60892e-10	15.3127
IQGAP2	-2.01224	10.1449	-7.69628	1.23178e-10	1.07473e-09	13.7574
TUBB2B	-1.99287	5.70419	-6.1325	6.36262e-08	3.23394e-07	7.58234
KLF9	-1.98872	9.72102	-10.4199	2.53338e-15	6.13328e-14	24.4824
CD79B	-1.98517	6.56743	-5.97873	1.16264e-07	5.61359e-07	6.98917
NAAA	-1.98026	9.91609	-11.1352	1.65507e-16	5.42788e-15	27.1971
IGF1	-1.97776	6.9406	-6.53505	1.29502e-08	7.45562e-08	9.15152
RCAN2	-1.97401	8.2343	-11.959	7.69497e-18	3.76137e-16	30.2497
ADORA3	-1.97316	6.17963	-7.60307	1.79251e-10	1.50021e-09	13.3855
CYBRD1	-1.97103	10.5683	-8.31325	1.03093e-11	1.13546e-10	16.2188
FBXL22	-1.9694	5.66343	-6.31591	3.0875e-08	1.65803e-07	8.29463
UST	-1.96819	6.27586	-6.93743	2.59893e-09	1.70521e-08	10.738
PHLPP2	-1.9675	9.53493	-9.86344	2.19672e-14	4.27071e-13	22.3334
GSN	-1.96643	13.4943	-13.5004	3.09981e-20	3.10435e-18	35.7315
TOX	-1.96633	8.14408	-7.39585	4.12608e-10	3.18209e-09	12.5594
NBEAL1	-1.96488	7.41514	-11.2944	9.08988e-17	3.15762e-15	27.7933
AKAP6	-1.96318	6.5736	-6.48801	1.56117e-08	8.84163e-08	8.96709
MS4A2	-1.96293	5.60876	-6.7233	6.11786e-09	3.74589e-08	9.89193
PTPRR	-1.95741	7.8762	-5.50306	7.32605e-07	3.03846e-06	5.18228
PLA2G10	-1.95348	7.94657	-7.86922	6.14166e-11	5.7157e-10	14.4476
KIAA0513	-1.9532	8.98645	-10.7624	6.81253e-16	1.89257e-14	25.7892
KCNN3	-1.95078	5.28515	-7.38684	4.27823e-10	3.28713e-09	12.5236
ZSCAN18	-1.94758	8.45965	-6.88447	3.21272e-09	2.06762e-08	10.5284
KCNAB1	-1.9437	5.22225	-7.84651	6.72924e-11	6.22023e-10	14.357
C6orf174	-1.94316	5.68116	-6.71659	6.28408e-09	3.83736e-08	9.86545
FAM13C	-1.9428	6.29757	-6.99041	2.10194e-09	1.40471e-08	10.9479
UGDH	-1.93934	11.0196	-12.5998	7.49443e-19	4.83839e-17	32.5658
GYPC	-1.93514	8.13218	-8.55648	3.88881e-12	4.67363e-11	17.187
C14orf139	-1.93476	6.05072	-8.58784	3.43024e-12	4.17692e-11	17.3117
NPR1	-1.9344	6.90814	-7.03271	1.7741e-09	1.20763e-08	11.1156
ITIH5	-1.92932	9.44144	-6.52546	1.34538e-08	7.72478e-08	9.11388
CSRP1	-1.92749	13.1766	-6.99469	2.0662e-09	1.38398e-08	10.9649
ARMCX1	-1.92511	7.19924	-7.34345	5.09378e-10	3.86029e-09	12.3507
FGF2	-1.92342	7.0533	-6.62469	9.06473e-09	5.36154e-08	9.50364
MATN2	-1.92226	10.4003	-7.01865	1.87695e-09	1.27006e-08	11.0599
EFNA5	-1.91899	6.74587	-6.92805	2.69846e-09	1.76431e-08	10.7009
FAM149A	-1.91785	6.74939	-7.29298	6.23955e-10	4.63619e-09	12.1498
GNG2	-1.91636	8.5785	-10.0418	1.09561e-14	2.28122e-13	23.0254
LRRK2	-1.91382	6.5137	-6.36646	2.52792e-08	1.37807e-07	8.49175
NAT2	-1.91086	7.26815	-7.46618	3.1093e-10	2.45704e-09	12.8397
NR3C1	-1.91064	9.05792	-9.61674	5.77717e-14	1.02334e-12	21.3715
BMP2	-1.90927	9.02718	-7.32374	5.51375e-10	4.15098e-09	12.2723
PPAP2A	-1.90693	10.0597	-15.3071	7.10822e-23	1.61278e-20	41.762
CEACAM1	-1.90534	12.8878	-7.52012	2.50274e-10	2.01811e-09	13.0547
CLIC5	-1.90484	10.7217	-7.81236	7.72065e-11	7.0635e-10	14.2207
OR51E2	-1.90468	5.0451	-5.54727	6.1848e-07	2.5982e-06	5.3482
SETBP1	-1.90428	7.7169	-7.85861	6.40949e-11	5.94608e-10	14.4053
FBLN1	-1.90286	11.5835	-6.51523	1.40117e-08	8.0091e-08	9.07378
PAMR1	-1.90165	7.3285	-8.45682	5.79674e-12	6.73117e-11	16.7905
TLR3	-1.90131	7.96615	-10.9084	3.9071e-16	1.16419e-14	26.3424
C2orf74	-1.90047	5.28531	-6.45038	1.81268e-08	1.01595e-07	8.81974
TPSB2	-1.89666	9.30908	-7.21952	8.3819e-10	6.0613e-09	11.8576
PDE5A	-1.89483	9.72864	-9.73505	3.63092e-14	6.76432e-13	21.8335
MYO1A	-1.88843	11.1046	-8.36935	8.23162e-12	9.29055e-11	16.4422
PITPNM3	-1.88694	8.65442	-9.3638	1.56545e-13	2.51673e-12	20.3801
CDKL1	-1.88473	5.59794	-11.3628	7.03258e-17	2.56902e-15	28.0486
FAM3D	-1.88316	12.4285	-6.44154	1.87741e-08	1.04937e-07	8.78513
KLK1	-1.88205	9.27926	-5.66631	3.91277e-07	1.70297e-06	5.79713
SSTR1	-1.88129	7.40167	-5.56504	5.77721e-07	2.44045e-06	5.41502
ZC3H12C	-1.88017	8.26415	-7.89584	5.51786e-11	5.19641e-10	14.5538
MEIS2	-1.88005	7.01089	-5.5938	5.17289e-07	2.20514e-06	5.52333
C1QTNF2	-1.8795	5.35662	-10.6803	9.32341e-16	2.50864e-14	25.477
C17orf91	-1.87813	7.55681	-9.61101	5.90867e-14	1.04573e-12	21.3491
APBB1	-1.87363	7.83367	-7.00198	2.00665e-09	1.34717e-08	10.9938
MAP2	-1.87265	5.48399	-6.34706	2.72966e-08	1.47649e-07	8.41605
ITPKA	-1.87003	8.11431	-6.66263	7.79295e-09	4.6697e-08	9.65291
TNFAIP8L3	-1.86541	6.70171	-7.11646	1.26785e-09	8.86547e-09	11.448
MFSD6L	-1.85723	6.18209	-6.87641	3.31802e-09	2.13005e-08	10.4965
CNGA1	-1.85679	5.84093	-5.68742	3.60663e-07	1.57877e-06	5.87706
ATP2A3	-1.85646	11.847	-7.17442	1.00465e-09	7.18405e-09	11.6783
KIAA0495	-1.8522	6.87599	-7.72884	1.0805e-10	9.53685e-10	13.8873
PTGER4	-1.84925	9.52042	-8.74657	1.81869e-12	2.34239e-11	17.9421
HIGD1A	-1.84683	11.9615	-12.4384	1.34095e-18	8.07322e-17	31.9873
C20orf194	-1.84633	7.45785	-6.5867	1.05451e-08	6.16084e-08	9.3543
VILL	-1.84233	10.4438	-9.0209	6.09513e-13	8.58251e-12	19.0286
FOXA1	-1.84112	8.64118	-6.05841	8.51048e-08	4.22171e-07	7.29607
C4orf34	-1.84085	9.67934	-11.2973	8.99179e-17	3.13415e-15	27.8041
ZNF626	-1.84055	5.09891	-8.01249	3.45147e-11	3.39609e-10	15.0193
ETFDH	-1.83706	9.29169	-16.6749	9.34776e-25	4.92076e-22	46.049
HSPA2	-1.83344	9.62348	-5.65831	4.03535e-07	1.75298e-06	5.76687
CLIP3	-1.83069	8.45757	-6.05163	8.73976e-08	4.32043e-07	7.26991
PDE1A	-1.83035	6.36065	-5.76255	2.69704e-07	1.21028e-06	6.16231
FXYD3	-1.83017	13.3889	-8.28953	1.13389e-11	1.23495e-10	16.1242
PRICKLE2	-1.82979	7.97799	-6.38804	2.32082e-08	1.27277e-07	8.57602
HHIP	-1.82754	5.51826	-5.74747	2.85929e-07	1.27639e-06	6.10496
ABHD3	-1.82501	10.1103	-10.7643	6.76299e-16	1.88391e-14	25.7965
COX7A1	-1.82397	6.71396	-6.56591	1.14546e-08	6.65805e-08	9.27264
GPRASP1	-1.82392	6.96382	-6.23227	4.29572e-08	2.25092e-07	7.9692
FCGR2B	-1.82267	6.87245	-5.76834	2.63723e-07	1.18577e-06	6.18433
APOB48R	-1.8212	10.4488	-6.72531	6.06898e-09	3.72262e-08	9.89986
ASAP3	-1.82051	8.71132	-9.23025	2.65535e-13	4.05914e-12	19.8547
DAAM2	-1.81544	8.40073	-8.66072	2.56286e-12	3.18882e-11	17.6013
EIF4E3	-1.81455	9.52928	-13.9434	6.71971e-21	8.16305e-19	37.2498
CCRL1	-1.81195	5.20801	-5.70842	3.32549e-07	1.46365e-06	5.9567
CMAH	-1.81166	7.1321	-6.78686	4.74663e-09	2.96737e-08	10.1427
ETHE1	-1.80956	11.868	-10.7732	6.53788e-16	1.83615e-14	25.8302
RILP	-1.80746	8.09125	-11.3021	8.83014e-17	3.08304e-15	27.8222
DSEL	-1.80504	6.23223	-7.48517	2.8807e-10	2.29228e-09	12.9154
TMEM200B	-1.80501	6.11058	-5.59891	5.07229e-07	2.1654e-06	5.54258
KCNK10	-1.80463	5.58616	-6.1637	5.62786e-08	2.88994e-07	7.70316
PPP1R14D	-1.80436	9.63915	-6.87006	3.40343e-09	2.17875e-08	10.4714
ZNF304	-1.80185	6.59889	-6.65599	8.00205e-09	4.7826e-08	9.62676
PAPSS2	-1.80161	11.4934	-8.74862	1.80383e-12	2.32617e-11	17.9503
ACVRL1	-1.80008	10.8431	-10.189	6.18415e-15	1.37107e-13	23.5944
LOC643008	-1.79901	5.21277	-7.4032	4.00589e-10	3.10109e-09	12.5887
TDP2	-1.79869	11.5551	-10.3232	3.67975e-15	8.61405e-14	24.111
EPB41L4A	-1.79829	7.44085	-10.2341	5.19281e-15	1.17152e-13	23.7683
GNAI1	-1.79808	8.57244	-9.18	3.24056e-13	4.85965e-12	19.6567
FKBP1B	-1.79006	6.09815	-7.12056	1.24718e-09	8.74771e-09	11.4643
ABP1	-1.78817	12.7018	-8.71599	2.05493e-12	2.61386e-11	17.8208
ZNF549	-1.78605	5.92509	-7.07117	1.52048e-09	1.04574e-08	11.2682
ADAMTS1	-1.78449	9.67718	-6.1697	5.49648e-08	2.82814e-07	7.72642
PIK3CG	-1.78418	6.55884	-7.07685	1.48626e-09	1.02358e-08	11.2908
RIMS3	-1.78305	7.48694	-7.34864	4.98852e-10	3.79172e-09	12.3714
MOCS1	-1.77748	8.21555	-8.55013	3.989e-12	4.77517e-11	17.1618
DPYD	-1.77392	7.99582	-8.39379	7.46284e-12	8.47881e-11	16.5396
FNBP1	-1.77379	10.3362	-8.30703	1.05697e-11	1.15979e-10	16.194
ZNF671	-1.7704	5.61304	-7.40881	3.91645e-10	3.03758e-09	12.6111
HSPB2	-1.76981	5.93797	-6.32056	3.0313e-08	1.62913e-07	8.31273
FOXD2	-1.76759	7.98282	-7.5413	2.29831e-10	1.87017e-09	13.1392
LOC441869	-1.76753	5.57077	-5.93578	1.37499e-07	6.53891e-07	6.82422
LOXL4	-1.76264	5.79117	-5.83976	1.99869e-07	9.21906e-07	6.45661
SEMA3G	-1.76	7.60038	-6.66715	7.65374e-09	4.59852e-08	9.67071
SGCE	-1.75794	7.8098	-6.60876	9.65872e-09	5.68992e-08	9.44098
TIAM1	-1.75422	6.50821	-6.55615	1.19079e-08	6.91176e-08	9.23434
RBP5	-1.7523	5.83362	-7.88879	5.67664e-11	5.3337e-10	14.5257
MEI1	-1.75116	5.90318	-6.08757	7.59062e-08	3.80179e-07	7.40863
ZNF256	-1.75056	5.24646	-6.22648	4.39481e-08	2.29932e-07	7.94673
CYP4F12	-1.75018	8.55174	-7.88104	5.85651e-11	5.48264e-10	14.4947
LRRC66	-1.74954	7.52553	-6.98713	2.1297e-09	1.41957e-08	10.9349
PDCD4	-1.74949	11.9485	-12.8434	3.13391e-19	2.234e-17	33.4325
TEF	-1.7473	9.2179	-11.3996	6.12816e-17	2.27096e-15	28.1856
HGD	-1.74727	7.63079	-6.50635	1.45153e-08	8.26396e-08	9.03894
TPSAB1	-1.74706	8.56743	-6.93444	2.63022e-09	1.72354e-08	10.7262
SLC39A5	-1.74435	10.665	-6.13614	6.27206e-08	3.1928e-07	7.59645
RGAG4	-1.74265	6.28146	-6.76129	5.25691e-09	3.26055e-08	10.0418
RASL12	-1.74055	7.69553	-5.95079	1.29672e-07	6.18721e-07	6.88184
KANK2	-1.73539	10.9292	-6.81409	4.25714e-09	2.68672e-08	10.2502
ATP2B4	-1.73349	11.0148	-5.51314	7.04873e-07	2.9353e-06	5.22009
AIFM3	-1.72855	9.12189	-6.18158	5.24532e-08	2.70841e-07	7.77248
MPEG1	-1.72832	9.84786	-7.10987	1.30182e-09	9.08751e-09	11.4219
ACAA2	-1.72787	11.7515	-9.63234	5.43365e-14	9.7341e-13	21.4325
PCSK5	-1.72728	7.26113	-7.49119	2.81169e-10	2.24171e-09	12.9394
AKAP7	-1.72685	8.06731	-8.48061	5.26957e-12	6.17845e-11	16.8852
LOC644538	-1.72602	5.82976	-6.28956	3.42636e-08	1.82567e-07	8.19199
D4S234E	-1.72576	6.41694	-6.26021	3.84731e-08	2.03256e-07	8.07781
CD1D	-1.72459	6.38836	-7.89623	5.50934e-11	5.19077e-10	14.5554
CD48	-1.72294	8.03446	-6.00501	1.04907e-07	5.10848e-07	7.09026
FUCA1	-1.72283	11.4401	-12.1489	3.83822e-18	2.07365e-16	30.9415
GNAL	-1.71967	6.27916	-7.96802	4.12735e-11	3.98376e-10	14.8419
SLCO2A1	-1.71517	9.73486	-8.81692	1.37345e-12	1.81214e-11	18.2211
SHE	-1.71425	6.97761	-8.5782	3.56509e-12	4.31807e-11	17.2734
SLC1A1	-1.71336	8.80346	-6.1795	5.28856e-08	2.72731e-07	7.76439
RHOF	-1.71288	9.65535	-5.79645	2.36479e-07	1.07505e-06	6.2914
C16orf45	-1.71187	7.63797	-6.28027	3.55435e-08	1.88945e-07	8.15585
ZNF772	-1.71149	5.67079	-6.24904	4.0207e-08	2.11654e-07	8.03438
PVRL3	-1.71121	8.44146	-6.90532	2.95552e-09	1.91768e-08	10.6109
IL11RA	-1.71032	7.28657	-8.23823	1.39322e-11	1.48973e-10	15.9198
RIMKLB	-1.70918	6.76502	-6.10741	7.02164e-08	3.5384e-07	7.48532
DPEP2	-1.70903	5.23706	-6.09079	7.49519e-08	3.75858e-07	7.42108
ZNF793	-1.70871	5.35379	-5.57959	5.46329e-07	2.31691e-06	5.46978
NDRG2	-1.70833	11.0857	-13.9364	6.88225e-21	8.31133e-19	37.2261
HSD17B6	-1.70825	6.23197	-6.19539	4.9677e-08	2.57542e-07	7.82604
VIPR1	-1.70543	9.79518	-6.60438	9.82862e-09	5.77509e-08	9.42376
BCL2	-1.70079	8.17156	-8.39281	7.49228e-12	8.50755e-11	16.5357
ZNF528	-1.69913	6.35271	-6.47985	1.61261e-08	9.11032e-08	8.93511
CPA3	-1.69904	8.12931	-5.49334	7.60351e-07	3.14148e-06	5.14587
AMT	-1.69473	8.21955	-6.61586	9.38933e-09	5.53917e-08	9.4689
CNRIP1	-1.69446	7.11139	-8.1498	1.98741e-11	2.05239e-10	15.5671
SNX24	-1.69173	6.87221	-12.2431	2.72255e-18	1.523e-16	31.2831
FMO4	-1.68889	6.48752	-10.6372	1.09944e-15	2.9039e-14	25.313
RNF180	-1.68832	5.17223	-5.66733	3.89741e-07	1.69664e-06	5.80099
C3orf70	-1.68648	8.19113	-7.04498	1.68892e-09	1.15424e-08	11.1643
C7orf31	-1.68496	7.21797	-9.04517	5.53459e-13	7.88516e-12	19.1245
SGSM1	-1.68482	6.31968	-6.68732	7.06226e-09	4.27512e-08	9.75014
SPG20	-1.68412	8.26022	-6.8752	3.33408e-09	2.13902e-08	10.4918
PXMP2	-1.68309	9.11596	-11.1709	1.447e-16	4.81472e-15	27.3307
SIGLEC1	-1.68223	7.85101	-5.50689	7.21944e-07	3.00152e-06	5.19664
SQRDL	-1.68115	12.0702	-11.7912	1.42834e-17	6.48755e-16	29.6345
ZNF439	-1.67993	5.96637	-6.6697	7.57645e-09	4.55742e-08	9.68073
SPTLC3	-1.67986	6.81072	-5.94922	1.30472e-07	6.22202e-07	6.87579
ARHGEF37	-1.67891	8.58996	-10.4509	2.24857e-15	5.50872e-14	24.601
CTSF	-1.67658	8.52286	-6.18494	5.17642e-08	2.67418e-07	7.7855
C4orf19	-1.67227	9.58338	-8.79213	1.51623e-12	1.99157e-11	18.1229
PARM1	-1.67164	12.3682	-8.40053	7.26403e-12	8.28043e-11	16.5664
PDE1B	-1.67004	5.55993	-5.97815	1.16524e-07	5.62261e-07	6.98697
SMPD1	-1.66759	9.77573	-10.9865	2.90541e-16	8.94273e-15	26.6372
C5orf4	-1.66742	8.88052	-5.76308	2.6915e-07	1.20832e-06	6.16433
ZNF542	-1.66686	6.52073	-6.99314	2.07906e-09	1.39124e-08	10.9587
ACVR1C	-1.66568	7.25865	-6.72505	6.07543e-09	3.72546e-08	9.89881
SSPN	-1.66446	8.63028	-6.3897	2.30566e-08	1.26599e-07	8.58249
EBF1	-1.66353	6.38048	-6.50912	1.43563e-08	8.18708e-08	9.04981
LOC100130933	-1.66284	6.08845	-7.72583	1.09367e-10	9.63649e-10	13.8753
CCL14-CCL15	-1.66204	7.09499	-6.75929	5.29916e-09	3.28378e-08	10.0339
TMTC1	-1.66006	7.93514	-6.31094	3.14882e-08	1.68831e-07	8.27524
PRRT1	-1.65978	5.25197	-8.90672	9.60168e-13	1.30805e-11	18.5769
DCLK2	-1.65968	6.16606	-7.079	1.47347e-09	1.01671e-08	11.2993
ENDOD1	-1.6584	10.7421	-12.7196	4.87616e-19	3.34808e-17	32.9931
MEF2C	-1.65674	8.53337	-8.54929	4.00242e-12	4.78844e-11	17.1584
CMBL	-1.65569	11.2884	-8.0469	3.00538e-11	2.99081e-10	15.1567
CITED2	-1.65527	9.87972	-11.361	7.08042e-17	2.57732e-15	28.0419
AMICA1	-1.65349	7.69567	-7.13401	1.18162e-09	8.33629e-09	11.5177
SLC25A20	-1.65215	9.2645	-13.65	1.84425e-20	2.0033e-18	36.2472
RASGRP4	-1.65197	5.0545	-6.19145	5.04547e-08	2.61245e-07	7.81074
SPPL2A	-1.65148	10.0776	-14.8468	3.21456e-22	5.68922e-20	40.2661
SAMD13	-1.64819	7.56666	-7.50972	2.60967e-10	2.09775e-09	13.0133
ADAMTSL4	-1.6475	7.94848	-7.49421	2.77776e-10	2.21983e-09	12.9514
SVIL	-1.64616	11.4196	-5.90952	1.52333e-07	7.18941e-07	6.7235
PTPRCAP	-1.64616	7.60905	-5.73524	2.99784e-07	1.33019e-06	6.05851
STYK1	-1.64371	8.26773	-7.82221	7.42054e-11	6.81627e-10	14.26
TSPYL5	-1.64186	6.88865	-5.64719	4.21203e-07	1.8224e-06	5.72484
TSPAN11	-1.64146	8.31462	-5.97716	1.16978e-07	5.64145e-07	6.98314
KAT2B	-1.64099	8.65766	-11.7319	1.77816e-17	7.75068e-16	29.4165
VLDLR	-1.64072	7.44964	-5.79184	2.40746e-07	1.09179e-06	6.27384
ANK3	-1.63903	9.42144	-10.5716	1.41395e-15	3.64222e-14	25.0626
KIAA1211	-1.63287	9.14388	-7.82699	7.27927e-11	6.69549e-10	14.279
PLCG2	-1.63221	8.16393	-6.72962	5.96551e-09	3.66244e-08	9.91685
PCDH7	-1.6315	8.08234	-5.70263	3.40082e-07	1.49377e-06	5.93472
FAM50B	-1.62865	6.1985	-6.29579	3.34302e-08	1.78451e-07	8.21626
EPHX2	-1.62569	10.1591	-10.4862	1.96325e-15	4.8737e-14	24.7361
SLC2A13	-1.62146	8.79505	-12.1034	4.53277e-18	2.40459e-16	30.7761
RCSD1	-1.62054	8.05531	-8.48425	5.19326e-12	6.1029e-11	16.8997
TLR7	-1.62044	6.02671	-6.35291	2.66719e-08	1.4467e-07	8.43887
SIAE	-1.6203	11.5139	-9.47927	9.92486e-14	1.66741e-12	20.8333
RIMKLA	-1.61983	8.40969	-8.5044	4.79065e-12	5.66871e-11	16.9799
TCN2	-1.61962	9.43379	-9.47019	1.02867e-13	1.71836e-12	20.7977
B3GALT4	-1.61773	8.29981	-10.7253	7.84982e-16	2.1402e-14	25.6482
SLC44A4	-1.6164	12.8169	-9.0548	5.32681e-13	7.62619e-12	19.1626
ZNF423	-1.61548	6.84155	-6.06981	8.1383e-08	4.0591e-07	7.34007
CBX7	-1.6143	9.84811	-9.31317	1.9124e-13	3.00395e-12	20.1811
PLCD4	-1.61401	5.95525	-5.83348	2.04803e-07	9.42316e-07	6.43265
JAZF1	-1.61362	7.74647	-6.29065	3.41161e-08	1.81876e-07	8.19624
CX3CR1	-1.61195	5.01579	-5.79627	2.3665e-07	1.07559e-06	6.29069
TMEM25	-1.61128	6.6519	-5.64658	4.22192e-07	1.8263e-06	5.72254
ATOH8	-1.60899	6.73283	-5.81571	2.19442e-07	1.00382e-06	6.36484
AHNAK	-1.60652	14.1121	-7.10471	1.32908e-09	9.24951e-09	11.4014
KCTD12	-1.60248	10.8298	-6.59043	1.03898e-08	6.07697e-08	9.36895
SYT15	-1.6007	5.29223	-8.48284	5.22269e-12	6.13398e-11	16.8941
HIST1H1C	-1.60052	8.90262	-7.50171	2.69517e-10	2.16055e-09	12.9813
BTK	-1.5978	6.78829	-5.46982	8.31856e-07	3.41492e-06	5.05784
ZFPM2	-1.59753	5.76412	-5.62233	4.63534e-07	1.99192e-06	5.63092
DENND2A	-1.59516	7.79614	-7.67144	1.3613e-10	1.17573e-09	13.6583
EPHB6	-1.59299	5.67223	-5.64194	4.29811e-07	1.85769e-06	5.70499
WFDC1	-1.59088	7.98157	-5.86334	1.82353e-07	8.46799e-07	6.54673
ARHGAP15	-1.59071	5.87799	-6.62974	8.88428e-09	5.26391e-08	9.52349
STBD1	-1.58772	9.54715	-10.4035	2.69883e-15	6.49554e-14	24.4194
RETSAT	-1.5861	11.8391	-10.9299	3.60065e-16	1.08072e-14	26.4237
MIER3	-1.58562	10.2957	-11.0529	2.25886e-16	7.18969e-15	26.8876
RAI2	-1.58201	7.53186	-5.76763	2.64443e-07	1.18849e-06	6.18165
RNF125	-1.58154	8.25543	-6.55332	1.20431e-08	6.98065e-08	9.22319
NDRG4	-1.58069	6.58159	-5.80213	2.31324e-07	1.05441e-06	6.31305
PDGFD	-1.57945	7.58984	-8.79422	1.50369e-12	1.97636e-11	18.1311
PARK2	-1.57806	5.34607	-7.33366	5.2983e-10	4.00199e-09	12.3118
PGM1	-1.57335	10.9469	-13.3248	5.72162e-20	5.08505e-18	35.1226
PECI	-1.57197	9.62051	-10.0579	1.02908e-14	2.15581e-13	23.0878
OSBPL1A	-1.57112	9.33695	-8.89375	1.01109e-12	1.36744e-11	18.5256
GOLM1	-1.56408	12.7871	-9.50861	8.84132e-14	1.50134e-12	20.9483
GPR34	-1.56323	7.03205	-5.99446	1.09326e-07	5.30353e-07	7.04968
BDKRB1	-1.56173	5.86793	-7.86605	6.22048e-11	5.77857e-10	14.4349
TRANK1	-1.56126	9.95606	-7.66698	1.38594e-10	1.19301e-09	13.6405
FEZ1	-1.56053	7.30525	-6.69784	6.77206e-09	4.1109e-08	9.79158
PPP1R16B	-1.56023	7.95005	-7.03574	1.75268e-09	1.19424e-08	11.1277
EPHA4	-1.55927	7.55381	-5.60578	4.9402e-07	2.1134e-06	5.56846
GAS7	-1.55252	9.27895	-5.99567	1.08808e-07	5.28344e-07	7.05435
ARRDC4	-1.54921	10.0112	-12.1058	4.49253e-18	2.38942e-16	30.785
DSC2	-1.54896	11.3846	-8.50041	4.86779e-12	5.75004e-11	16.964
PLCD3	-1.54771	11.3969	-8.57476	3.61453e-12	4.3728e-11	17.2597
LPP	-1.54541	8.97646	-7.72332	1.10479e-10	9.72609e-10	13.8653
GIMAP7	-1.54304	7.50481	-7.554	2.18376e-10	1.78788e-09	13.1898
CD69	-1.54236	6.39326	-5.86585	1.8058e-07	8.39328e-07	6.55633
TUBB4	-1.54202	6.4317	-8.48913	5.09286e-12	5.99177e-11	16.9191
LTBP4	-1.54086	11.7222	-9.35514	1.62e-13	2.60186e-12	20.3461
PTPLAD2	-1.53574	7.34529	-7.0612	1.58256e-09	1.08626e-08	11.2287
ZNF788	-1.53545	5.3443	-6.23447	4.25863e-08	2.23205e-07	7.97774
NFASC	-1.53199	8.20999	-5.81832	2.17228e-07	9.948e-07	6.3748
C2orf72	-1.52934	9.33925	-6.96678	2.31065e-09	1.52926e-08	10.8543
AKR1C3	-1.52827	10.5383	-5.80595	2.27921e-07	1.04052e-06	6.3276
IL16	-1.52583	8.46384	-6.99814	2.03782e-09	1.3672e-08	10.9786
TMEM56	-1.52468	9.6927	-6.06303	8.35764e-08	4.15655e-07	7.3139
MEOX1	-1.52358	5.9133	-5.61763	4.71995e-07	2.02467e-06	5.61318
AHRR	-1.52247	5.20789	-7.81769	7.55676e-11	6.93519e-10	14.2419
GSTM2	-1.52227	8.14835	-6.17314	5.42251e-08	2.79288e-07	7.73976
SLC25A23	-1.52065	11.4934	-13.2753	6.80556e-20	5.94545e-18	34.9502
MOBKL2B	-1.52036	9.83529	-9.70632	4.064e-14	7.47616e-13	21.7214
ATP8B1	-1.51974	12.4838	-10.0032	1.27338e-14	2.61425e-13	22.8758
SLC41A2	-1.5195	8.70636	-8.11113	2.32152e-11	2.37591e-10	15.4129
SLC30A4	-1.51773	6.62473	-10.6731	9.5836e-16	2.56856e-14	25.4496
SYNPO	-1.5124	10.9034	-8.75898	1.73078e-12	2.24182e-11	17.9913
TTC28	-1.51223	7.97065	-6.51521	1.4013e-08	8.0091e-08	9.07369
OLFML3	-1.51129	9.09497	-6.18835	5.10737e-08	2.64183e-07	7.79873
SLC22A5	-1.50907	9.28778	-8.66387	2.53081e-12	3.15852e-11	17.6138
PEX26	-1.50815	9.94126	-11.2818	9.53026e-17	3.28834e-15	27.7462
TCF7L1	-1.50662	7.46394	-7.67088	1.36437e-10	1.17741e-09	13.6561
PLSCR4	-1.50522	9.1195	-10.5491	1.54136e-15	3.94073e-14	24.9768
ZDBF2	-1.50386	6.25465	-6.38335	2.36438e-08	1.29304e-07	8.55769
ST6GALNAC3	-1.50383	5.67695	-6.65226	8.12182e-09	4.84866e-08	9.61209
TPM1	-1.50341	13.4052	-6.16714	5.55206e-08	2.85459e-07	7.71651
C1orf210	-1.50329	9.44632	-9.64362	5.19802e-14	9.3446e-13	21.4766
CDC14A	-1.50213	7.88257	-8.63213	2.87319e-12	3.54061e-11	17.4877
C14orf50	-1.49892	6.25873	-6.3271	2.95393e-08	1.58963e-07	8.33821
WNT2B	-1.49809	6.10038	-6.49053	1.54564e-08	8.75606e-08	8.97696
ENPP2	-1.49731	9.07601	-7.98841	3.80236e-11	3.70491e-10	14.9233
RARRES2	-1.49438	10.2271	-6.43434	1.93175e-08	1.07798e-07	8.75698
GLTP	-1.49397	10.3448	-17.4079	1.00567e-25	6.66016e-23	48.2513
PTPRS	-1.49288	7.89143	-5.46382	8.51119e-07	3.48494e-06	5.03543
TRPC6	-1.49258	5.35883	-6.48076	1.60678e-08	9.07985e-08	8.93869
SYNE1	-1.49236	9.12704	-6.05839	8.51128e-08	4.22171e-07	7.29597
GIMAP5	-1.49168	8.20994	-7.79654	8.22815e-11	7.48113e-10	14.1575
TTC22	-1.49131	8.22288	-8.16064	1.90267e-11	1.96983e-10	15.6104
MFSD7	-1.48873	6.24138	-6.22387	4.44041e-08	2.322e-07	7.93656
PAG1	-1.48833	9.69036	-7.08818	1.4202e-09	9.82697e-09	11.3358
TST	-1.48697	12.0939	-9.11539	4.18742e-13	6.16256e-12	19.4018
POU2F2	-1.48656	6.365	-5.49875	7.44777e-07	3.0852e-06	5.16614
AKAP5	-1.48563	7.49694	-6.42017	2.0434e-08	1.13412e-07	8.70157
ACSF2	-1.48562	9.59057	-7.52413	2.46267e-10	1.9905e-09	13.0707
CASP7	-1.48295	11.0463	-10.8471	4.93252e-16	1.42226e-14	26.1105
BRP44L	-1.48098	9.7241	-11.2833	9.47599e-17	3.27512e-15	27.7519
FBXO32	-1.48071	9.2417	-6.29657	3.33271e-08	1.77993e-07	8.2193
PDZRN3	-1.47976	8.97394	-5.45759	8.71623e-07	3.55824e-06	5.01212
C16orf62	-1.47881	9.41899	-7.00682	1.96816e-09	1.32479e-08	11.013
RECK	-1.47616	7.47654	-7.3662	4.6485e-10	3.553e-09	12.4413
CFH	-1.47073	9.72467	-7.14623	1.12507e-09	7.97571e-09	11.5663
KCNS3	-1.47053	7.61253	-5.55222	6.06839e-07	2.55086e-06	5.36683
C17orf73	-1.46584	7.68641	-8.19488	1.65815e-11	1.73771e-10	15.7469
EPM2A	-1.45839	6.95555	-6.41302	2.10212e-08	1.16388e-07	8.67362
RAB37	-1.45833	7.03188	-5.6066	4.92453e-07	2.10714e-06	5.57157
ZFYVE28	-1.45621	8.03974	-8.04667	3.00824e-11	2.99122e-10	15.1557
LRRC31	-1.45576	8.54992	-5.86868	1.786e-07	8.30688e-07	6.56716
GNA11	-1.45104	10.3362	-12.0325	5.87528e-18	3.00048e-16	30.5181
SLC36A1	-1.4507	9.65759	-7.73105	1.07095e-10	9.45663e-10	13.8961
ZNF134	-1.44847	6.67683	-6.00115	1.06501e-07	5.17997e-07	7.07543
BCAR3	-1.44468	9.04312	-11.8421	1.18328e-17	5.55897e-16	29.8217
LMO2	-1.44274	7.32159	-8.62881	2.91162e-12	3.58152e-11	17.4745
JAM3	-1.44259	8.87298	-5.8629	1.82666e-07	8.47871e-07	6.54504
SLC46A3	-1.44239	9.51695	-9.52166	8.39809e-14	1.43212e-12	20.9995
FAS	-1.44154	8.89258	-7.5018	2.69419e-10	2.16055e-09	12.9817
C18orf18	-1.4376	6.38205	-6.55332	1.20428e-08	6.98065e-08	9.22322
DUSP1	-1.43484	11.391	-6.45524	1.77807e-08	9.97918e-08	8.83875
CNNM2	-1.43454	8.44141	-9.588	6.46822e-14	1.13304e-12	21.2592
TMEM54	-1.43427	12.2997	-8.73691	1.89018e-12	2.42231e-11	17.9038
RAB27A	-1.43294	9.61498	-10.0894	9.10407e-15	1.93847e-13	23.2097
MXD1	-1.43281	10.893	-7.08144	1.45913e-09	1.00726e-08	11.309
ARHGAP28	-1.43259	5.6086	-7.21461	8.54907e-10	6.16698e-09	11.8381
TRIM36	-1.43144	7.82812	-6.10825	6.99869e-08	3.52856e-07	7.48854
APPL2	-1.43143	10.8387	-10.2921	4.14947e-15	9.561e-14	23.9914
GPRIN2	-1.42992	8.70234	-6.01641	1.00326e-07	4.90288e-07	7.13418
GIMAP1	-1.42964	6.4174	-7.34023	5.16018e-10	3.90629e-09	12.3379
TNFRSF11A	-1.42959	8.89813	-5.78123	2.50863e-07	1.13291e-06	6.23341
CD96	-1.42714	6.53797	-5.85889	1.85536e-07	8.60414e-07	6.52972
FOXF1	-1.42401	8.91229	-6.11976	6.68929e-08	3.38421e-07	7.53305
ZZEF1	-1.42251	10.9986	-9.50478	8.97566e-14	1.52038e-12	20.9333
EMP1	-1.42249	11.6043	-6.27106	3.68604e-08	1.9549e-07	8.12
PAQR8	-1.4218	11.212	-7.2217	8.30882e-10	6.02118e-09	11.8663
ACAT1	-1.42065	10.6291	-11.5219	3.87994e-17	1.52304e-15	28.6403
PRDX6	-1.41991	12.4296	-12.8149	3.46843e-19	2.43859e-17	33.3317
ZEB2	-1.41832	9.25338	-6.67912	7.29716e-09	4.39973e-08	9.71783
BMP6	-1.4179	6.33189	-7.26139	7.08421e-10	5.21286e-09	12.0241
PGCP	-1.41646	8.77213	-6.23123	4.31327e-08	2.25896e-07	7.96518
CPEB3	-1.41563	6.95368	-13.576	2.38321e-20	2.52202e-18	35.9926
PBX1	-1.41557	10.2775	-6.66209	7.80969e-09	4.67716e-08	9.65079
MICALCL	-1.41395	6.17779	-6.89575	3.07083e-09	1.98502e-08	10.5731
PDE4D	-1.41357	9.07082	-8.72787	1.9597e-12	2.50359e-11	17.8679
CLIC2	-1.41312	7.59815	-7.25921	7.14639e-10	5.24921e-09	12.0155
FAM49A	-1.41173	5.82906	-5.60514	4.95233e-07	2.11771e-06	5.56605
ITPR1	-1.40641	8.61904	-5.97801	1.16587e-07	5.62392e-07	6.98643
CLCN2	-1.40574	9.53751	-6.91695	2.82101e-09	1.83683e-08	10.657
B3GNT8	-1.40536	9.21054	-7.77802	8.86467e-11	7.98559e-10	14.0836
MAGI2	-1.40451	6.4155	-7.49404	2.77965e-10	2.21997e-09	12.9507
ANKRD44	-1.40405	5.64575	-5.98991	1.11287e-07	5.39678e-07	7.03219
IKZF1	-1.40378	7.93704	-5.77269	2.59311e-07	1.16798e-06	6.20089
C4orf31	-1.40232	7.24466	-5.75721	2.75338e-07	1.23286e-06	6.14201
C10orf54	-1.40205	10.2623	-11.517	3.95274e-17	1.54057e-15	28.6218
P2RY13	-1.40057	6.1013	-5.57952	5.46476e-07	2.31705e-06	5.46952
TNFSF12	-1.39841	8.69718	-6.81815	4.18864e-09	2.64512e-08	10.2662
DIXDC1	-1.39795	8.97334	-6.05703	8.55674e-08	4.24016e-07	7.29073
STAB1	-1.39707	10.2307	-6.36337	2.55907e-08	1.39376e-07	8.47967
ZFP3	-1.39621	7.6	-6.91406	2.85391e-09	1.85649e-08	10.6455
FBXL7	-1.39547	7.30941	-5.54021	6.35446e-07	2.66511e-06	5.32168
TMEM47	-1.3929	8.76996	-5.52648	6.69784e-07	2.79769e-06	5.27012
RELL1	-1.39265	8.5359	-10.1813	6.37337e-15	1.40694e-13	23.5645
CPAMD8	-1.38969	5.1482	-6.82652	4.05076e-09	2.56278e-08	10.2993
TMOD2	-1.38894	7.9584	-5.57961	5.46287e-07	2.31691e-06	5.46986
C16orf5	-1.38851	8.46416	-5.94981	1.30168e-07	6.20897e-07	6.87809
OLFML1	-1.38475	7.41275	-6.12174	6.63744e-08	3.36155e-07	7.54071
LDOC1	-1.38415	6.39443	-6.01936	9.91755e-08	4.85126e-07	7.14553
C8orf42	-1.38404	5.92857	-5.47258	8.23147e-07	3.38255e-06	5.06815
GPR183	-1.38326	7.6385	-5.55795	5.9365e-07	2.50105e-06	5.38836
HMOX1	-1.38177	9.6481	-6.31226	3.13245e-08	1.68041e-07	8.28038
TSC22D3	-1.37936	10.3829	-6.103	7.14456e-08	3.59681e-07	7.46824
GIMAP8	-1.37643	7.76698	-7.56065	2.12617e-10	1.74741e-09	13.2163
BCL2L15	-1.37594	10.3162	-6.65019	8.18921e-09	4.8845e-08	9.60393
KLF2	-1.37378	8.38109	-6.68871	7.0232e-09	4.25454e-08	9.75562
GRAMD3	-1.37203	9.33621	-12.5019	1.06625e-18	6.63336e-17	32.2152
GLOD5	-1.36975	5.52335	-6.48326	1.59091e-08	8.99939e-08	8.94847
C3orf18	-1.36375	6.20821	-6.13599	6.27585e-08	3.19393e-07	7.59586
ATP8A1	-1.36166	9.81857	-7.14108	1.14856e-09	8.12261e-09	11.5458
PINK1	-1.36023	10.8626	-16.0279	7.05063e-24	2.53946e-21	44.0504
NLGN3	-1.35994	5.15549	-6.19801	4.91683e-08	2.55098e-07	7.83617
SRI	-1.35779	12.3153	-7.59204	1.87386e-10	1.5575e-09	13.3415
NIPAL1	-1.35628	7.90074	-6.25451	3.93482e-08	2.07452e-07	8.05565
FAM161B	-1.3519	6.09235	-8.70132	2.17894e-12	2.7511e-11	17.7625
GPD1L	-1.35051	10.8265	-15.6833	2.11117e-23	6.10456e-21	42.9646
EVI2B	-1.35015	8.3129	-5.80169	2.31724e-07	1.056e-06	6.31135
NAT1	-1.34844	8.17268	-7.19724	9.16669e-10	6.5986e-09	11.769
ATL1	-1.34769	7.59045	-9.13295	3.90544e-13	5.76825e-12	19.4711
TAGAP	-1.34764	7.19927	-5.74925	2.83962e-07	1.26801e-06	6.11173
PJA2	-1.34715	11.206	-12.9158	2.42191e-19	1.81467e-17	33.6887
BTC	-1.34686	6.00821	-5.80488	2.28872e-07	1.04416e-06	6.32351
GPR162	-1.34575	5.45399	-7.14252	1.14195e-09	8.0842e-09	11.5515
TMPRSS2	-1.34551	12.3649	-6.92574	2.72343e-09	1.77894e-08	10.6918
ZNF132	-1.34481	5.57121	-10.8495	4.88881e-16	1.41164e-14	26.1194
HECTD2	-1.34428	6.57734	-5.75988	2.72508e-07	1.22206e-06	6.15215
PTPN21	-1.33934	9.00944	-9.92337	1.73824e-14	3.45794e-13	22.5663
NEDD4L	-1.33384	10.7723	-9.45275	1.1019e-13	1.82435e-12	20.7293
LEPR	-1.33383	7.76187	-6.82597	4.05961e-09	2.56759e-08	10.2972
RIOK3	-1.3337	11.143	-10.9713	3.07729e-16	9.44345e-15	26.58
CCL15	-1.33297	8.89569	-7.16643	1.0374e-09	7.4002e-09	11.6466
CNNM4	-1.33253	11.2647	-8.18037	1.75766e-11	1.83451e-10	15.6891
P2RX4	-1.33199	9.90858	-8.23534	1.40948e-11	1.50398e-10	15.9082
CMKLR1	-1.33024	7.97537	-5.97165	1.19523e-07	5.75067e-07	6.96198
GIMAP6	-1.32696	8.4602	-6.77415	4.99378e-09	3.11051e-08	10.0925
EFHD1	-1.32668	6.11421	-6.32256	3.00738e-08	1.61754e-07	8.32054
PRSS36	-1.32522	5.69764	-7.11957	1.25212e-09	8.77637e-09	11.4604
SCN1B	-1.32514	6.2121	-5.79282	2.39834e-07	1.08837e-06	6.27757
ZNF347	-1.32428	5.95242	-5.97038	1.2012e-07	5.7753e-07	6.95708
FAM134B	-1.32301	9.79758	-6.00096	1.0658e-07	5.18257e-07	7.0747
PPAP2B	-1.31999	10.1095	-10.602	1.25856e-15	3.2748e-14	25.1785
C1orf21	-1.31522	10.3413	-7.05957	1.59293e-09	1.09228e-08	11.2222
GVIN1	-1.31275	6.24236	-5.69508	3.50144e-07	1.53534e-06	5.90611
NBPF1	-1.31218	9.33759	-8.70473	2.14947e-12	2.72063e-11	17.7761
SLC22A23	-1.31151	10.5547	-6.7199	6.20167e-09	3.79494e-08	9.87849
SOCS2	-1.3099	8.18692	-8.91883	9.14942e-13	1.25142e-11	18.6249
LIMA1	-1.30975	12.2676	-9.32282	1.84079e-13	2.9048e-12	20.219
LSP1	-1.30862	9.83876	-6.54224	1.25854e-08	7.266e-08	9.17972
GALNT12	-1.30811	10.7862	-7.98036	3.92752e-11	3.81059e-10	14.8911
SIPA1L2	-1.30611	10.1883	-8.86677	1.12587e-12	1.51271e-11	18.4187
SHD	-1.30534	6.68227	-6.19439	4.98728e-08	2.58492e-07	7.82216
TESK2	-1.30491	7.6917	-9.18176	3.21798e-13	4.83639e-12	19.6636
PPARGC1B	-1.30413	6.68129	-8.17343	1.80736e-11	1.88171e-10	15.6614
SMPD3	-1.3023	10.01	-7.53533	2.3542e-10	1.91073e-09	13.1154
HCFC2	-1.30203	7.94679	-8.15438	1.95115e-11	2.01596e-10	15.5854
EBI3	-1.30199	5.25922	-5.46369	8.51559e-07	3.48604e-06	5.03492
AXL	-1.30158	9.50912	-5.5628	5.82703e-07	2.45998e-06	5.4066
PHF7	-1.30151	6.08145	-7.99985	3.63141e-11	3.55861e-10	14.9689
MXI1	-1.29959	10.353	-11.0319	2.44578e-16	7.70121e-15	26.8085
P2RY8	-1.29893	6.94966	-5.64882	4.18575e-07	1.8118e-06	5.73097
CKMT1B	-1.29725	11.3909	-6.09343	7.41794e-08	3.72166e-07	7.43128
ABCC6P2	-1.29658	5.81986	-6.80728	4.3746e-09	2.75408e-08	10.2233
IL10RA	-1.29444	8.80392	-5.74555	2.8806e-07	1.28535e-06	6.09767
FAM162A	-1.29062	10.8814	-11.3143	8.43699e-17	2.97208e-15	27.8675
ATP5A1	-1.29032	13.4577	-13.2012	8.82786e-20	7.42771e-18	34.6917
GPR146	-1.28979	6.1864	-6.88261	3.23671e-09	2.0798e-08	10.5211
ZNF287	-1.28939	5.35389	-5.55742	5.94871e-07	2.50517e-06	5.38635
TBC1D9	-1.28612	8.55792	-6.51316	1.41276e-08	8.06784e-08	9.06566
MOSC2	-1.28249	7.65835	-10.9204	3.7334e-16	1.1173e-14	26.3877
SMARCD3	-1.28026	7.22457	-5.79568	2.37191e-07	1.07757e-06	6.28845
CHCHD10	-1.27781	10.2375	-8.70018	2.18889e-12	2.76032e-11	17.758
VAMP2	-1.27773	10.1953	-12.4891	1.11643e-18	6.883e-17	32.1695
NTN4	-1.27772	8.7834	-6.77828	4.91214e-09	3.06244e-08	10.1088
MAF	-1.27573	9.12199	-5.94648	1.31872e-07	6.28735e-07	6.8653
CDKN1A	-1.27542	11.8742	-6.38463	2.3524e-08	1.28718e-07	8.5627
ARHGEF6	-1.27358	8.28063	-6.45059	1.81115e-08	1.01537e-07	8.82057
VWA5A	-1.27331	10.1856	-8.38903	7.60668e-12	8.62791e-11	16.5206
LGR4	-1.27325	10.9976	-8.82731	1.31772e-12	1.74309e-11	18.2623
EPB41L4B	-1.27323	11.3731	-7.93428	4.72737e-11	4.51199e-10	14.7072
TEK	-1.27022	7.60259	-6.04065	9.12399e-08	4.49306e-07	7.22757
EDNRB	-1.27018	8.40499	-7.09686	1.37162e-09	9.51649e-09	11.3702
KLF8	-1.26901	6.00133	-6.34605	2.74061e-08	1.48182e-07	8.41211
APBA1	-1.26901	7.53516	-6.14688	6.01274e-08	3.06763e-07	7.63803
CPT2	-1.26768	10.3629	-10.7244	7.87539e-16	2.14432e-14	25.645
HSBP1L1	-1.26485	7.34426	-6.9135	2.86025e-09	1.86002e-08	10.6433
GCOM1	-1.2645	8.63011	-7.87071	6.10501e-11	5.68933e-10	14.4535
DOCK10	-1.26367	7.71434	-5.55939	5.90388e-07	2.48884e-06	5.39376
RCAN1	-1.26038	9.9599	-8.70217	2.1716e-12	2.74357e-11	17.7659
KITLG	-1.25515	9.76853	-7.95921	4.27615e-11	4.10888e-10	14.8067
ABCA5	-1.2539	8.64797	-5.9964	1.08498e-07	5.27213e-07	7.05715
TNFSF10	-1.25274	10.9984	-8.48268	5.22599e-12	6.13434e-11	16.8935
TXNIP	-1.25167	13.8184	-5.77217	2.59833e-07	1.16956e-06	6.19892
CYTSB	-1.2506	9.21145	-6.97469	2.23854e-09	1.48489e-08	10.8857
SUCLG2	-1.24955	11.6389	-12.369	1.72364e-18	1.00245e-16	31.7377
MAGEH1	-1.24662	7.71588	-6.0311	9.4718e-08	4.65206e-07	7.19077
CROT	-1.24636	8.49407	-6.23124	4.31322e-08	2.25896e-07	7.96519
TP53I3	-1.24546	9.54742	-8.68858	2.29278e-12	2.87894e-11	17.7119
ABLIM3	-1.24517	7.45342	-5.56504	5.77712e-07	2.44045e-06	5.41503
IGSF9	-1.24402	9.24385	-5.56216	5.84148e-07	2.46558e-06	5.40417
2018-03-08	-1.24045	8.16038	-10.2026	5.86821e-15	1.31024e-13	23.6466
KIAA1737	-1.24043	9.91155	-15.9805	8.19105e-24	2.85021e-21	43.902
C2orf7	-1.2383	8.97792	-9.11501	4.19383e-13	6.16758e-12	19.4003
CHP	-1.23756	12.0742	-8.74896	1.80143e-12	2.32454e-11	17.9516
LXN	-1.23657	8.89381	-6.08793	7.57997e-08	3.79738e-07	7.41001
MYL6	-1.23567	14.2692	-8.27964	1.17981e-11	1.28224e-10	16.0848
RPS6KA5	-1.23408	7.88004	-8.24409	1.36081e-11	1.45811e-10	15.9431
NEURL1B	-1.23383	10.772	-7.49015	2.82346e-10	2.25022e-09	12.9353
CCNYL1	-1.23321	9.52093	-11.2067	1.26409e-16	4.28247e-15	27.4652
CPT1A	-1.23127	11.8768	-8.85245	1.192e-12	1.5901e-11	18.362
RGL1	-1.23044	8.74434	-6.21367	4.62249e-08	2.40984e-07	7.89698
C17orf76	-1.22614	9.13417	-8.03631	3.13622e-11	3.10596e-10	15.1144
GNG11	-1.22139	8.49108	-5.52146	6.82771e-07	2.8502e-06	5.2513
2018-09-06	-1.21882	9.45694	-5.78998	2.42489e-07	1.09945e-06	6.26676
TCEAL3	-1.21522	7.4861	-5.50926	7.15417e-07	2.97559e-06	5.20554
RBKS	-1.21457	6.73314	-7.71255	1.15373e-10	1.01179e-09	13.8223
SLC6A9	-1.21289	8.72217	-6.67116	7.53241e-09	4.53491e-08	9.68649
CYP26B1	-1.2125	6.29737	-5.52744	6.6731e-07	2.78963e-06	5.27374
SLC25A4	-1.21012	9.79818	-7.61447	1.71209e-10	1.44291e-09	13.431
LOC282997	-1.20999	5.8482	-8.92636	8.87932e-13	1.21772e-11	18.6547
TAL1	-1.20786	5.26431	-6.31184	3.13761e-08	1.68273e-07	8.27876
RNASEL	-1.20652	8.54649	-10.864	4.62629e-16	1.3472e-14	26.1743
EPHX1	-1.20578	10.3003	-7.97539	4.00677e-11	3.88197e-10	14.8713
RNASE1	-1.20512	11.7838	-5.47165	8.26072e-07	3.39389e-06	5.06468
EAF2	-1.20347	6.25488	-5.80522	2.28571e-07	1.04302e-06	6.32481
ANTXR2	-1.20213	10.9319	-7.79443	8.29829e-11	7.53489e-10	14.1491
EMP3	-1.20098	8.85352	-5.54683	6.19517e-07	2.60202e-06	5.34656
SLMAP	-1.19948	10.783	-6.53931	1.27328e-08	7.34283e-08	9.16823
FCGRT	-1.19879	12.4384	-6.42093	2.03726e-08	1.13132e-07	8.70453
OCEL1	-1.19563	8.17589	-8.9858	7.00841e-13	9.77463e-12	18.8898
RHOU	-1.19529	9.94155	-8.07675	2.66553e-11	2.69706e-10	15.2758
ACADM	-1.19316	10.2401	-9.30503	1.97496e-13	3.09275e-12	20.1491
F2RL1	-1.19065	11.3559	-6.50708	1.44728e-08	8.24447e-08	9.04184
PDGFRA	-1.18957	10.2574	-5.64198	4.29745e-07	1.85769e-06	5.70514
HSD17B11	-1.1886	11.585	-8.83649	1.27032e-12	1.68583e-11	18.2987
MPPE1	-1.18808	9.11839	-12.6877	5.46599e-19	3.67924e-17	32.8796
FAM107B	-1.18465	10.5352	-6.58684	1.05393e-08	6.1592e-08	9.35484
C14orf159	-1.18328	9.82533	-8.33026	9.62918e-12	1.06858e-10	16.2865
GIMAP4	-1.1814	8.55989	-6.15554	5.81145e-08	2.97455e-07	7.67155
ST3GAL3	-1.18047	6.74246	-5.7139	3.25585e-07	1.43624e-06	5.97747
RBM47	-1.18028	11.9685	-8.85534	1.17837e-12	1.57295e-11	18.3734
MAN1C1	-1.17894	7.31663	-5.46896	8.34579e-07	3.42336e-06	5.05464
CLMN	-1.17693	10.6299	-6.86447	3.48041e-09	2.22422e-08	10.4493
TENC1	-1.17644	9.92788	-6.55186	1.2113e-08	7.01692e-08	9.21748
LGALS3	-1.17642	14.336	-7.07894	1.47382e-09	1.01671e-08	11.2991
CHFR	-1.17627	8.68173	-5.55726	5.95221e-07	2.50613e-06	5.38577
C5orf30	-1.17477	9.6853	-8.30432	1.06854e-11	1.17061e-10	16.1832
RAB30	-1.17417	6.54111	-6.91066	2.89293e-09	1.88068e-08	10.6321
ACOX1	-1.17119	11.3876	-7.04075	1.71777e-09	1.1724e-08	11.1476
GAB1	-1.17066	9.57331	-9.81428	2.66235e-14	5.0892e-13	22.1421
IL6ST	-1.16862	9.12228	-7.3539	4.88426e-10	3.7235e-09	12.3923
2018-03-02	-1.16527	9.07994	-8.01328	3.44044e-11	3.38763e-10	15.0225
PDLIM2	-1.16432	8.96836	-6.88283	3.2339e-09	2.07865e-08	10.5219
A2M	-1.16252	13.0902	-5.97901	1.16133e-07	5.60991e-07	6.99027
ECHDC2	-1.16064	9.05899	-5.68685	3.61457e-07	1.5819e-06	5.87491
CD302	-1.16023	9.326	-8.31554	1.02148e-11	1.12687e-10	16.2279
TJP3	-1.15812	10.9708	-6.59402	1.02423e-08	5.99838e-08	9.38306
TOM1L2	-1.1581	10.3731	-11.1398	1.62679e-16	5.36084e-15	27.2142
OPN3	-1.15623	9.06741	-6.14917	5.95885e-08	3.04468e-07	7.64689
PELI2	-1.15603	8.00595	-6.1242	6.57353e-08	3.33221e-07	7.55024
TMEM20	-1.15142	7.9964	-6.68001	7.27123e-09	4.38796e-08	9.72134
GPR37L1	-1.15072	5.17768	-5.86995	1.7772e-07	8.26783e-07	6.57201
RAP1A	-1.15039	10.7489	-10.431	2.42741e-15	5.90458e-14	24.5249
CASD1	-1.14884	9.39593	-9.85295	2.28867e-14	4.43267e-13	22.2926
LIPH	-1.14829	10.088	-5.58176	5.41796e-07	2.2991e-06	5.47795
ZBTB7B	-1.147	11.1921	-8.91749	9.19859e-13	1.2573e-11	18.6195
MYCT1	-1.14474	6.87136	-6.42543	2.0012e-08	1.11341e-07	8.72215
A1CF	-1.14432	7.6907	-5.69992	3.43659e-07	1.50819e-06	5.92445
[truncated: 116 more rows]
